# Supplementary material
Source: HighWire-hosted journal article supplement (https://rmdopen.bmj.com/content/8/2/e002216)
Supplement: inline-supplementary-material-2 [file inline-supplementary-material-2.pdf]

**PTC-1:** Measurement of biopharmaceutical blood concentrations should be performed in a validated laboratory.

| Study                        | Study design                                        | Population                               | Scope/Intervention                                                                                                                                                                | Study population                   | Results                                                                                                                                                                                                                                                                                                                                                                                                                                                                                                                                                                                                                                                                                                                                                                                                                                                          | Tool used for RoB assessment                                 | Risk of Bias               |
|------------------------------|-----------------------------------------------------|------------------------------------------|-----------------------------------------------------------------------------------------------------------------------------------------------------------------------------------|------------------------------------|------------------------------------------------------------------------------------------------------------------------------------------------------------------------------------------------------------------------------------------------------------------------------------------------------------------------------------------------------------------------------------------------------------------------------------------------------------------------------------------------------------------------------------------------------------------------------------------------------------------------------------------------------------------------------------------------------------------------------------------------------------------------------------------------------------------------------------------------------------------|--------------------------------------------------------------|----------------------------|
| Bodio C. et al, 2020         | Observational cross-sectional study.                | RA patients treated with Ifx, Ada or Etn | Bridging ELISA vs. RGA Serum samples                                                                                                                                              | 163 samples                        | Agreement between methods: $k=0.57$ [0.42-0.71]                                                                                                                                                                                                                                                                                                                                                                                                                                                                                                                                                                                                                                                                                                                                                                                                                  | Quality Assessment of Diagnostic Accuracy Studies (QUADAS-2) | MODERATE (3x low, 1x high) |
| Clarke WT. et al, 2019       | Observational prospective and cross-sectional study | IBD patients treated with IFX or ADA     | Direct ELISA (non-specific detection) vs. HMSA (specific detection) Serum samples                                                                                                 | IFX: 45 samples<br>ADA: 30 samples | - Measured concentrations were higher by HMSA:<br>IFX: HMSA>ELISA (12.6 [10-17.3] vs 5.7 [4.8-9] $\mu\text{g/mL}$ ) $p<0.001$<br>ADA: HMSA>ELISA (19.9 [15.6-26] vs 10.3[8.5-14] $\mu\text{g/mL}$ ) $p<0.001$<br>- Good correlations:<br>IFX: $r=0.861$ ; $p<0.001$<br>ADA: $r=0.935$ ; $p<0.001$<br>- Weak Intraclass correlations:<br>IFX (ICC): 0.356 (95% CI=-0.069 to 0.720)<br>ADA (ICC): 0.395 (95% CI=-0.073 to 0.759)<br>- Qualitative agreement:<br>IFX:<br>concentration>5 $\mu\text{g/mL}$ ( $k=0.106$ ; $p=0.113$ )<br>concentration>7 $\mu\text{g/mL}$ ( $k=0.050$ ; $p=0.283$ )<br>concentration>10 $\mu\text{g/mL}$ ( $k=0.095$ ; $p=0.134$ )<br>ADA:<br>concentration>5 $\mu\text{g/mL}$ ( $k=0.651$ ; $p<0.001$ )<br>concentration>7 $\mu\text{g/mL}$ ( $k=0.651$ ; $p<0.001$ )<br>concentration>10 $\mu\text{g/mL}$ ( $k=0.133$ ; $p=0.143$ ) | Quality Assessment of Diagnostic Accuracy Studies (QUADAS-2) | LOW (3x low, 1x unclear)   |
| Hock BD. et al, 2019         | Observational study                                 | IBD patients treated with ADA            | Direct ELISA (non-specific detection) vs. HMSA (specific detection) Serum samples                                                                                                 | 82 random samples                  | Pearson's correlation: $r=0.91$<br>ICC: 0.88 (95% CI=0.80-0.93)                                                                                                                                                                                                                                                                                                                                                                                                                                                                                                                                                                                                                                                                                                                                                                                                  | Quality Assessment of Diagnostic Accuracy Studies (QUADAS-2) | LOW (4x low)               |
| Laserna-Mendieta et al, 2019 | Observational study                                 | IBD patients treated with ADA            | - Direct ELISA (non-specific detection) vs. QB<br>Sandwich ELISA (specific detection) vs. QB<br><br>-Direct ELISA (non-specific detection) vs sandwich ELISA (specific detection) | 50 samples                         | <b>ELISA vs. POC</b><br><u>Quantitative analyses (Bland-Altman limits of agreement):</u><br>-Direct ELISA vs QB: 3.1 (-6.6 to 12.8), $p<0.001$<br>-Sandwich ELISA vs QB: 3.9 (-5.4 to 13.2), $p<0.001$<br><u>Qualitative analyses</u><br>Subtherapeutic levels=5 $\mu\text{g/mL}$<br>-Direct ELISA vs QB: 80% agreement; kappa (95%CI): 0.688 (0.515-0.860)<br>-Sandwich ELISA vs QB: 68% agreement; kappa (95%CI): 0.531 (0.351-0.710)<br>Subtherapeutic levels=7.5 $\mu\text{g/mL}$<br>-Direct ELISA vs QB: 78% agreement; kappa (95%CI): 0.660 (0.489-0.832)<br>-Sandwich ELISA vs QB: 62% agreement; kappa (95%CI): 0.454 (0.278-0.630)<br><br><b>ELISA vs. ELISA</b><br>Bland-Altman limits of agreement: 0.8 (-3.9 to 5.4), $p>0.05$                                                                                                                       | Quality Assessment of Diagnostic Accuracy Studies (QUADAS-2) | LOW (4x low)               |

|                             |                                                   |                                            |                                                                                                                                                                                                                                                                                                                                                                                                                                      |             |                                                                                                                                                                                                                                                                                                                                                                                                                                                                                                                                                                                                                                                                                                                                                                                                                                                                                                                                                                                                                                                                                                                                                                                                                                                                                                          |                                                              |                            |
|-----------------------------|---------------------------------------------------|--------------------------------------------|--------------------------------------------------------------------------------------------------------------------------------------------------------------------------------------------------------------------------------------------------------------------------------------------------------------------------------------------------------------------------------------------------------------------------------------|-------------|----------------------------------------------------------------------------------------------------------------------------------------------------------------------------------------------------------------------------------------------------------------------------------------------------------------------------------------------------------------------------------------------------------------------------------------------------------------------------------------------------------------------------------------------------------------------------------------------------------------------------------------------------------------------------------------------------------------------------------------------------------------------------------------------------------------------------------------------------------------------------------------------------------------------------------------------------------------------------------------------------------------------------------------------------------------------------------------------------------------------------------------------------------------------------------------------------------------------------------------------------------------------------------------------------------|--------------------------------------------------------------|----------------------------|
| Novakovic et al, 2019       | Observational study                               | IBD patients treated with IFX              | Sandwich ELISA (specific detection) vs. QB                                                                                                                                                                                                                                                                                                                                                                                           | 30 samples  | Correlation: $r=0.92$ , $p<0.001$<br>The Bland-Altman plot: the mean difference between Promonitor IFX and QB was $-0.57 \mu\text{g/mL}$ ( $p=0.2$ )                                                                                                                                                                                                                                                                                                                                                                                                                                                                                                                                                                                                                                                                                                                                                                                                                                                                                                                                                                                                                                                                                                                                                     | Quality Assessment of Diagnostic Accuracy Studies (QUADAS-2) | LOW (4x low)               |
| Van den Bossche et al, 2019 | Observational study                               | IBD patients treated with IFX              | Sandwich ELISA (specific detection) vs. QB<br>Sandwich ELISA (specific detection) vs. LFA                                                                                                                                                                                                                                                                                                                                            | 150 samples | Spearman's correlation:<br>- Sandwich ELISA (specific detection) vs QB: $r=0.888$ (0.849–0.918)<br>- Sandwich ELISA (specific detection) vs LFA: $r=0.962$ (0.948–0.973)<br><br>Clinical agreement:<br>- Sandwich ELISA (specific detection) vs QB: Cohen's $\kappa$ score (95% CI)= 0.782 (0.715–0.849)<br>- Sandwich ELISA (specific detection) vs LFA: Cohen's $\kappa$ score (95% CI)= 0.852 (0.795–0.910)<br><br>Therapeutic ranges (3-7mg/L):<br>- Agreement (ELISA vs QB)=74.7%<br>- Agreement (ELISA vs LFA)=84.7%                                                                                                                                                                                                                                                                                                                                                                                                                                                                                                                                                                                                                                                                                                                                                                               | Quality Assessment of Diagnostic Accuracy Studies (QUADAS-2) | LOW (3x low, 1x unclear)   |
| Nasser et al, 2018          | Observational study                               | CD patients treated with IFX               | - Direct ELISA (non-specific detection) vs. QB<br>Direct ELISA (non-specific detection) vs. LFA<br>Direct ELISA (specific detection) vs. QB<br>Direct ELISA (specific detection) vs. LFA<br>Sandwich ELISA (specific detection) vs. QB<br><br>- QB vs. LFA<br>Sandwich ELISA (specific detection) vs. LFA<br><br>- Direct ELISA (non-specific detection) vs direct ELISA (specific detection) vs sandwich ELISA (specific detection) | 85 patients | <b>ELISA vs. POC</b><br>Spearman's correlation:<br>- Direct ELISA (non-specific detection) vs LFA: $r=0.97$<br>- Direct ELISA (non-specific detection) vs QB: $r=0.96$<br>- Direct ELISA (specific detection) vs LFA: $r=0.99$<br>- Direct ELISA (specific detection) vs QB: $r=0.98$<br>- Sandwich ELISA (specific detection, Sanquin) vs LFA: $r=0.95$<br>- Sandwich ELISA (specific detection, Sanquin) vs QB: $r=0.95$<br>- Sandwich ELISA (specific detection, Grifols) vs LFA: $r=0.97$<br>- Sandwich ELISA (specific detection, Grifols) vs QB: $r=0.97$<br><br><b>POC vs. POC</b><br>Spearman's correlation: $r=0.98$<br><br><b>ELISA vs. ELISA</b><br>Spearman's correlation:<br>- Direct ELISA (non-specific detection) vs direct ELISA (specific detection): $r=0.97$<br>- Direct ELISA (non-specific detection) vs sandwich ELISA (specific detection, Sanquin): $r=0.93$<br>- Direct ELISA (non-specific detection) vs sandwich ELISA (specific detection, Grifols): $r=0.95$<br>- Direct ELISA (specific detection) vs sandwich ELISA (specific detection, Sanquin): $r=0.94$<br>- Direct ELISA (specific detection) vs sandwich ELISA (specific detection, Grifols): $r=0.97$<br>- Sandwich ELISA (specific detection, Sanquin) vs Sandwich ELISA (specific detection, Grifols): $r=0.94$ | Quality Assessment of Diagnostic Accuracy Studies (QUADAS-2) | LOW (3x low, 1x unclear)   |
| Teixeira et al, 2018        | Observational cross-sectional multicentric study. | IBD patients in remission treated with IFX | Direct ELISA (specific detection) vs. QB                                                                                                                                                                                                                                                                                                                                                                                             | 49 samples  | ELISA: AUC: $0.966\pm 0.02$ (95% CI: 0.87-0.99).<br>QB: AUC: $0.827\pm 0.06$ (95% CI: 0.69-0.92).<br>Difference between AUC ( $p=0.03$ ).                                                                                                                                                                                                                                                                                                                                                                                                                                                                                                                                                                                                                                                                                                                                                                                                                                                                                                                                                                                                                                                                                                                                                                | Quality Assessment of Diagnostic                             | MODERATE (3x low, 1x high) |

|                       |                                     |                                                             |                                                                                                                                                                                                          |              |                                                                                                                                                                                                                                                                                                                                                                                              | Accuracy Studies (QUADAS-2)                                  |                               |
|-----------------------|-------------------------------------|-------------------------------------------------------------|----------------------------------------------------------------------------------------------------------------------------------------------------------------------------------------------------------|--------------|----------------------------------------------------------------------------------------------------------------------------------------------------------------------------------------------------------------------------------------------------------------------------------------------------------------------------------------------------------------------------------------------|--------------------------------------------------------------|-------------------------------|
| Verstockt et al, 2018 | Observational retrospective study   | CD pts treated with ADA                                     | Direct ELISA (specific detection) vs. LFA Serum samples                                                                                                                                                  | 116 samples  | ICC (after 4 weeks of treatment): 0.92, p<0.001<br>ICC (after 12 weeks of treatment): 0.97, p<0.001                                                                                                                                                                                                                                                                                          | Quality Assessment of Diagnostic Accuracy Studies (QUADAS-2) | LOW<br>(3x low, 1x unclear)   |
| Yang et al, 2018      | Observational study                 | Patients treated with ADA (different diseases)              | RGA vs. LC-MS/MS                                                                                                                                                                                         | 43 samples   | Passing-Bablok regression slope is r=0.866. 12% positive bias for LC-MS/MS                                                                                                                                                                                                                                                                                                                   | Quality Assessment of Diagnostic Accuracy Studies (QUADAS-2) | MODERATE<br>(2x low, 2x high) |
| Bader et al, 2017     | Observational cross-sectional study | 107 pts treated with IFX (78 rheumatology & 29 dermatology) | - Sandwich ELISA (specific detection) vs. IFMA (specific detection)<br><br>- Sandwich ELISA (specific detection) vs. RGA<br><br>- RGA vs. IFMA (specific detection)<br><br>Serum samples                 | 107 samples  | <b>ELISA vs. IFMA</b><br>Bland-Altman plots:<br>Therapeutic ranges<br>- 3-8mg/L: agreement=80%<br>- 1.5-12mg/L: agreement=84%<br><b>ELISA vs. RGA</b><br>Bland-Altman plots:<br>Therapeutic ranges<br>- 3-8mg/L: agreement=64%<br>- 1.5-12mg/L: agreement=65%<br><b>RGA vs. IFMA</b><br>Bland-Altman plots:<br>Therapeutic ranges<br>- 3-8mg/L: agreement=50%<br>- 1.5-12mg/L: agreement=56% | Quality Assessment of Diagnostic Accuracy Studies (QUADAS-2) | LOW<br>(4x low)               |
| Afonso J et al, 2016  | Observational study                 | IBD patients treated with IFX                               | - Sandwich ELISA (specific detection) vs. QB<br>Direct ELISA (non-specific detection) vs. QB<br><br>- Sandwich ELISA (specific detection) vs. direct ELISA (non-specific detection)<br><br>Serum samples | 299 patients | <b>ELISA vs. POC</b><br>- ICC (sandwich ELISA vs QB)=0.939 (0.924-0.952)<br>- ICC (direct ELISA vs QB)=0.889 (0.861-0.911)<br><b>ELISA vs. ELISA</b><br>Spearman's correlation: r=0.919, p<0.001                                                                                                                                                                                             | Quality Assessment of Diagnostic Accuracy Studies (QUADAS-2) | LOW<br>(4x low)               |

|                           |                                   |                                                                                                                       |                                                                                                                                                                                                            |                                                                          |                                                                                                                                                                                                                                                                                                                                                                                                                                                                                                                                                                                                      |                                                              |                               |
|---------------------------|-----------------------------------|-----------------------------------------------------------------------------------------------------------------------|------------------------------------------------------------------------------------------------------------------------------------------------------------------------------------------------------------|--------------------------------------------------------------------------|------------------------------------------------------------------------------------------------------------------------------------------------------------------------------------------------------------------------------------------------------------------------------------------------------------------------------------------------------------------------------------------------------------------------------------------------------------------------------------------------------------------------------------------------------------------------------------------------------|--------------------------------------------------------------|-------------------------------|
| van Bezooijen et al, 2016 | Observational study               | IFX: 40 pts with sarcoidosis, uveitis or Behcet's disease<br>ADA: 40 pts with psoriasis<br>ETN: 40 pts with psoriasis | - Sandwich ELISA (specific detection) vs. RGA<br>Direct ELISA (non-specific detection) vs. RGA<br><br>- Sandwich ELISA (specific detection) vs. direct ELISA (non-specific detection)<br><br>Serum samples | 120 samples:<br>-40 pts with IFX<br>-40 pts with ADA<br>-40 pts with ETN | <b>ELISA vs. RGA</b><br>IFX (Pearson's Correlation):<br>- Sandwich ELISA vs. RGA: $r^2=0.99$ , $p=0.0001$<br>- Direct ELISA vs. RGA: $r^2=0.92$ , $p=0.0001$<br>ADA (Pearson's Correlation):<br>- Sandwich ELISA vs. RGA: $r^2=0.86$ , $p=0.002$<br>- Direct ELISA vs. RGA: $r^2=0.78$ , $p=0.0007$<br>ETN (Pearson's Correlation):<br>- Sandwich ELISA vs. RGA: $r^2=0.85$ , $p=0.0002$<br>- Direct ELISA vs. RGA: $r^2=0.86$ , $p=0.0004$<br><br><b>ELISA vs. ELISA</b><br>Pearson's correlations:<br>IFX: $r^2=0.77$ , $p=0.0001$<br>ADA: $r^2=0.88$ , $p=0.0001$<br>ETN: $r^2=0.82$ , $p=0.0001$ | Quality Assessment of Diagnostic Accuracy Studies (QUADAS-2) | MODERATE<br>(2x low, 2x high) |
| Bodini G. et al, 2015     | Observational study               | CD patients treated with ADA                                                                                          | Sandwich ELISA vs. HMSA (specific detection)<br>Serum samples                                                                                                                                              | 23 patients                                                              | Correlation after 48 weeks of treatment: $r=0.691$ , $p=0.0003$<br>Correlation after 96 weeks of treatment: $r=0.822$ , $p=0.0001$                                                                                                                                                                                                                                                                                                                                                                                                                                                                   | Quality Assessment of Diagnostic Accuracy Studies (QUADAS-2) | LOW<br>(4x low)               |
| Martin et al, 2015        | Observational retrospective study | Patients with rheumatic diseases treated with golimumab                                                               | Sandwich ELISA (specific detection in 2 steps) vs sandwich ELISA (specific detection in 1 step)<br>Serum samples                                                                                           | 48 patients (102 samples)                                                | Spearman's correlation: $r=0.98$ , $p<0.0001$                                                                                                                                                                                                                                                                                                                                                                                                                                                                                                                                                        | Quality Assessment of Diagnostic Accuracy Studies (QUADAS-2) | MODERATE<br>(3x low, 1x high) |
| Steenholdt et al, 2015    | post hoc analysis of a RCT        | 42 CD pts treated with Ifx                                                                                            | RGA vs. HMSA<br>Serum samples                                                                                                                                                                              | 41 samples                                                               | Pearson's correlation: $r=0.96$ [0.93-0.97], $p<0.0001$                                                                                                                                                                                                                                                                                                                                                                                                                                                                                                                                              | Quality Assessment of Diagnostic Accuracy Studies (QUADAS-2) | LOW<br>(3x low, 1x unclear)   |
| Willrich et al, 2015      | Observational study               | Rheumatology and gastroenterology patients treated with IFX                                                           | LC-MS/MS vs ECLIA                                                                                                                                                                                          | 51 patients                                                              | Passing-Bablok regression slope is $r=0.967$ (95% CI: 0.894 to 1.034)                                                                                                                                                                                                                                                                                                                                                                                                                                                                                                                                | Quality Assessment of Diagnostic Accuracy Studies (QUADAS-2) | MODERATE<br>(3x low, 1x high) |

|                          |                                     |                                            |                                                                                                                                                 |             |                                                                                                                                                                                                                                          |                                                              |                             |
|--------------------------|-------------------------------------|--------------------------------------------|-------------------------------------------------------------------------------------------------------------------------------------------------|-------------|------------------------------------------------------------------------------------------------------------------------------------------------------------------------------------------------------------------------------------------|--------------------------------------------------------------|-----------------------------|
| Steenholdt C et al, 2014 | Post hoc analysis of RCT            | CD patients treated with IFX               | - Direct ELISA (non-specific detection) vs. HMSA (specific detection)<br><br>-Direct ELISA (no specific detection) vs. RGA<br><br>Serum samples | 66 patients | <b>ELISA vs. HMSA</b><br>Different IFX detection: 76% by ELISA and 88% by HMSA<br>ICC: 0.96 (0.94-0.98), p<0.0001<br><br><b>ELISA vs. RGA</b><br>Different IFX detection: 76% by ELISA and 74% by RGA<br>ICC: 0.72 (0.23-0.88), p<0.0001 | Quality Assessment of Diagnostic Accuracy Studies (QUADAS-2) | LOW<br>(3x low, 1x unclear) |
| Corstjens et al, 2013    | Observational cross-sectional study | CD pts in maintenance and treated with IFX | Sandwich ELISA (specific detection) vs. LFA<br>Serum samples                                                                                    | 84 samples  | Spearman's correlation: r <sup>2</sup> =0.85                                                                                                                                                                                             | Quality Assessment of Diagnostic Accuracy Studies (QUADAS-2) | LOW<br>(4x low)             |
| Steenholdt et al, 2013   | Observational cross-sectional study | 13 CD pts treated with IFX                 | - Direct ELISA (non-specific detection) vs. RIA (non-specific detection)<br>- RGA vs. RIA (non-specific detection)<br><br>Serum samples         | 13 samples  | <b>ELISA vs. RIA</b><br>Pearson's correlation: r <sup>2</sup> =0.98 (0.73-1.00), p=0.001<br><br><b>RGA vs. RIA</b><br>Pearson's correlation: r <sup>2</sup> =0.97 (0.62-1.00), p=0.002                                                   | Quality Assessment of Diagnostic Accuracy Studies (QUADAS-2) | LOW<br>(3x low, 1x unclear) |

**PTC-2:** Measurement of ADA<sub>b</sub> should be performed in a validated laboratory, preferably using a consistent assay over time. Measurement should be performed and interpreted alongside contemporaneous biopharmaceutical blood concentrations

| Study                      | Study design                         | Population                                                              | Scope/Intervention                                                         | Study population                                                     | Results                                                                                                                                                                                                                                                                                                                                                                                                                                                     | Tool used for RoB assessment                                 | Risk of Bias                  |
|----------------------------|--------------------------------------|-------------------------------------------------------------------------|----------------------------------------------------------------------------|----------------------------------------------------------------------|-------------------------------------------------------------------------------------------------------------------------------------------------------------------------------------------------------------------------------------------------------------------------------------------------------------------------------------------------------------------------------------------------------------------------------------------------------------|--------------------------------------------------------------|-------------------------------|
| Bodio C. et al, 2020       | Observational cross-sectional study. | RA patients treated with IFX, ADA or ETN                                | Bridging ELISA vs. RGA<br>Serum samples                                    | 163 samples                                                          | Agreement between methods: $k=0.58$ [0.39-0.76]                                                                                                                                                                                                                                                                                                                                                                                                             | Quality Assessment of Diagnostic Accuracy Studies (QUADAS-2) | MODERATE<br>(3x low, 1x high) |
| Ogric et al, 2019          | Observational cross-sectional study  | patients with chronic rheumatic diseases or IBD treated with IFX or ADA | - cELISA (direct) vs. RGA<br>- cELISA (direct) vs. bELISA<br>Serum samples | 77 patients:<br>-46 pts treated with IFX<br>-31 pts treated with ADA | <b>cELISA vs. RGA</b><br>Spearman's correlations:<br>- IFX ADA <sub>b</sub> : $r^2=0.932$ , $p<0.0001$ ; $kappa=1.0$ ; 100% agreement<br>- ADA ADA <sub>b</sub> : $r^2=0.947$ , $p<0.0001$ ; $kappa=1.0$ ; 100% agreement<br><b>cELISA vs. bELISA</b><br>Spearman's correlations:<br>- IFX ADA <sub>b</sub> : $r^2=0.493$ , $p=0.0375$ ; $kappa=0.517$ ; 78% agreement<br>- ADA ADA <sub>b</sub> : $r^2=0.952$ , $p=0.0001$ ; $kappa=0.627$ ; 81% agreement | Quality Assessment of Diagnostic Accuracy Studies (QUADAS-2) | LOW<br>(3x low, 1x unclear)   |
| Real-Fernández et al, 2019 | Observational study                  | RA patients treated with ADA                                            | - bELISA vs. RGA<br>- bELISA vs. SPR<br>- RGA vs. SPR<br>Serum samples     | 50 patients                                                          | <b>bELISA vs. RGA</b><br>Spearman's correlations: $r=0.800$ ; $p=0.022$<br><b>bELISA vs. SPR</b><br>Spearman's correlations: $r=-0.241$ ; $p=0.582$<br><b>RGA vs. SPR</b><br>Spearman's correlations: $r=0.108$ ; $p=0.793$                                                                                                                                                                                                                                 | Quality Assessment of Diagnostic Accuracy Studies (QUADAS-2) | LOW<br>(4x low)               |
| Steenholdt C et al, 2014   | Post hoc analysis of RCT             | CD patients treated with IFX                                            | bELISA vs. RGA<br>Serum samples                                            | 66 patients                                                          | Pearson's correlation: $r=0.96$ ; $p<0.0001$<br>Spearman's correlation: $r=0.78$ ; $p<0.0001$                                                                                                                                                                                                                                                                                                                                                               | Quality Assessment of Diagnostic Accuracy Studies (QUADAS-2) | LOW<br>(3x low, 1x unclear)   |
| Steenholdt et al, 2013     | Observational cross-sectional study  | CD pts treated with IFX                                                 | - bELISA vs RGA<br>- bELISA vs EIA<br>Serum samples                        | 12 samples                                                           | <b>bELISA vs. RGA</b><br>Spearman's correlation: $r=0.93$ , $p=0.02$<br><b>bELISA vs. EIA</b><br>Spearman's correlation: $r=0.89$ , $p=0.03$                                                                                                                                                                                                                                                                                                                | Quality Assessment of Diagnostic Accuracy Studies (QUADAS-2) | LOW<br>(3x low, 1x unclear)   |

**PTC-3:** Biopharmaceutical blood concentrations are dependent on the dose, administration interval, and date of last dose. When interpreting biopharmaceutical blood concentrations, also patient-specific factors that influence PK should be considered, which include body weight, methotrexate co-prescription, disease activity, and adherence to therapy.

| Study                                              | Study design                | Population              | Scope/Intervention                                                              | Study population                        | Follow-up | Outcome measures | Results                                                                                                                                                                                                                                                                                                                                                                                                                                              | Tool used for RoB assessment        | Risk of Bias                                                                                                                                           |
|----------------------------------------------------|-----------------------------|-------------------------|---------------------------------------------------------------------------------|-----------------------------------------|-----------|------------------|------------------------------------------------------------------------------------------------------------------------------------------------------------------------------------------------------------------------------------------------------------------------------------------------------------------------------------------------------------------------------------------------------------------------------------------------------|-------------------------------------|--------------------------------------------------------------------------------------------------------------------------------------------------------|
| Wolbink G. et al, 2005 <sup>1</sup>                | Prospective observational   | RA pts starting IFX     | Measurements of IFX trough DL 2, 6 and 14 weeks after treatment initiation      | 105 pts<br>Mean age: 56 y<br>% male: 18 | 14 weeks  | IFX DL           | Median (IQR) IFX DL at various time points after treatment initiation:<br>W2 IFX DL: 22.3 (15.3–29.4) mg/l,<br>W6 IFX DL: 14.6 (7.3–22) mg/l,<br>W14 IFX DL: 2.8 (0.6–6.8) mg/l.<br>-Reviewer conclusion: Trough IFX DL were higher in induction phase vs. start of maintenance phase (W14).                                                                                                                                                         | Newcastle-Ottawa for cohort studies | Sum score:<br>***, **<br>Selection: ***<br>Comparability: *<br>Outcome: *                                                                              |
| Jurado T. et al, 2017 <sup>2</sup><br>No 197       | Retrospective observational | RA pts treated with IFX | Measurements of IFX trough DL at W2, W6, W14 and W22 after treatment initiation | 66 pts<br>Mean age: 56<br>% male: 14    | 52 weeks  | IFX DL           | IFX DL at various time points, stratified by W54 undetectable vs. detectable IFX DL (mean or median not specified):<br>W2 IFX DL: 20.0 ±12.7 µg/mL vs 29.7±14.5 µg/mL<br>W6 IFX DL: 4.2±5.9 µg/mL vs 15.7±11.1 µg/mL<br>W14 IFX DL: 0.1±0.2 µg/mL vs 4.1±5.3 µg/mL<br>W22 IFX DL: 0.01±0.04 µg/mL vs 2.8±3.3 µg/mL<br>-Reviewer conclusion: Trough IFX DL were higher in induction phase vs. maintenance phase.                                      | Quality in Prognosis Studies Tool   | 1.Study participation: Moderate<br>2.Attrition: Moderate<br>3.Prognostic factor: Moderate<br>4.Outcome: Low<br>5.Confounding: Low<br>6.Statistics: Low |
| Van den Bemt B. et al, 2013 <sup>3</sup><br>no 206 | Prospective observational   | RA pts starting IFX     | IFX trough DL measured at W2, W6 and W26 after treatment initiation             | 57 pts<br>Mean age; 57y<br>% male: 37   | 6 months  | IFX DL           | IFX DL in 6 months EULAR-responders (mean or median not specified):<br>W2: 23.4 mg/L (±20.8),<br>W6: 12.3 mg/L (±6.1)<br><br>IFX DL in 6 months EULAR non- or partial responders:<br>W2: 16.0 mg/L (±10.4),<br>W6: 9.0 mg/L (±6.8)<br><br>IFX DL (median (IQR)) at W14:<br>EULAR responders: 0.9 (0.05–2.6) mg/L<br>non-responders: 2.0 (0.7–5.4) mg/L.<br>-Reviewer conclusion: Trough IFX DL were higher in induction phase vs. maintenance phase. | Quality in Prognosis Studies Tool   | 1.Study participation: Moderate<br>2.Attrition: Moderate<br>3.Prognostic factor: Low<br>4.Outcome: Low<br>5.Confounding: High<br>6.Statistics: Low     |

#### Weight / Body Mass Index (BMI)

| Study | Study design | Population | Scope/Intervention | Study population | Follow-up | Outcome measures | Results | Tool used for RoB assessment | Risk of Bias |
|-------|--------------|------------|--------------------|------------------|-----------|------------------|---------|------------------------------|--------------|
|-------|--------------|------------|--------------------|------------------|-----------|------------------|---------|------------------------------|--------------|

| TOCILIZUMAB     |                                                                                                     |                                                    |                                                                                    |                                                                                                                                 |          |                                            |                                                                                                                                                                                                                                                                                                                                                                                                                                                                                                                                                                                                                                  |                                   |                                                                                                                                                                                |
|-----------------|-----------------------------------------------------------------------------------------------------|----------------------------------------------------|------------------------------------------------------------------------------------|---------------------------------------------------------------------------------------------------------------------------------|----------|--------------------------------------------|----------------------------------------------------------------------------------------------------------------------------------------------------------------------------------------------------------------------------------------------------------------------------------------------------------------------------------------------------------------------------------------------------------------------------------------------------------------------------------------------------------------------------------------------------------------------------------------------------------------------------------|-----------------------------------|--------------------------------------------------------------------------------------------------------------------------------------------------------------------------------|
| Arad 2019       | Israeli cohort of TOZURA, multinational phase IV, single arm open label                             | RA tocilizumab 162 mg sc weekly                    | To determine whether trough levels are associated with disease activity / response | 100 pts, 54 years, 80% female, DAS28 5.0, CDAI 31.9                                                                             | 24 weeks | Trough level, BMI                          | <p>in a linear model, every increase of 1 BMI unit was associated with a decrease of 1.5 µg/ml in the serum TCZ concentrations (p &lt; 0.0001).</p> <p>The TCZ concentrations were significantly lower in the &gt; 100 kg weight group compared to the &lt; 60 kg and the 60–100 kg weight groups (p&lt;0.05)</p>                                                                                                                                                                                                                                                                                                                | Quality in Prognosis Studies Tool | <p>1.Study participation: low</p> <p>2.Attrition: high</p> <p>3.Prognostic factor: high</p> <p>4.Outcome: Low</p> <p>5.Confounding: moderate</p> <p>6.Statistics: moderate</p> |
| Bastida 2018    | Population pharmacokinetic analysis, data from prospective observational cohort, monocentric, Spain | RA, tocilizumab iv, 4, 6 and 8 mg/kg every 4 weeks | Provide scientific rationale for body weighted dosing                              | 35 patients, 88% female, age 54 years, weight 63.5 kg, height 161 cm, disease duration 11 years, 75% cotreatment MTX, DAS28 2,2 | N/A      | Area under the curve concentration, weight | <p>19 patients on 8 mg/kg every 4 weeks, 8 each on 4 and 6 mg/kg/4wks, respectively.</p> <p>Usual 8mg/kg/4w reached target (defined as a cAUC (area under the curve concentration) at 24 weeks of treatment &gt;100 × 103 µg/ml) in 99,8%. Patients with extremely low weight (&lt;50 kg) were at risk of underdosing. (mean cAUC ± SD: 142.6 ± 23.0). Patients from weights 60-120 kg are far above the threshold (cAUC).</p> <p>With reduced dosing (6 mg/kg), lower percentage (90.5%) achieves the target, with risk of underdosing for &lt;60 kg</p> <p>For 4 mg/kg, &gt; 30% of 40-90 kg patients would be underdosed.</p> | Quality in Prognosis Studies Tool | <p>1.Study participation: moderate</p> <p>2.Attrition: high</p> <p>3.Prognostic factor: low</p> <p>4.Outcome: Low</p> <p>5.Confounding: moderate</p> <p>6.Statistics: low</p>  |
| Abdallah 2017   | Pooled data RCTs (SUMMACT A and BREVACTA), population pharmacokinetic model                         | RA, tocilizumab after inadequate DMARD response    | PK/PD sc tocilizumab                                                               | N/A (supp tab S1)                                                                                                               | 24 weeks | Drug level, body weight                    | <p>Increase in body weight associated with lower trough levels. Observed trough levels for sc weekly dosing were 21.6 ± 14.5 ug/ml for &gt; 100 kg, 41.5 ± 24.7 ug/ml for 60-100 kg and 62.1 ± 30.5 ug/ml for &lt; 60 kg.</p> <p>For iv dosing levels were 20.8 ± 13 ug/ml, 19.8 ± 14.5 ug/ml and 15.2 ± 11.4 ug/ml for &gt; 100 kg, 60-100 kg and &lt;6k kg, respectively.</p>                                                                                                                                                                                                                                                  | Cochrane Rob2 for RCT             | <p>Overall: low</p> <p>Randomisation: Low</p> <p>Intervention: low</p> <p>Missing outcome data: low</p> <p>Outcome measurement: low</p> <p>Selective reporting: Low</p>        |
| ABATACEPT       |                                                                                                     |                                                    |                                                                                    |                                                                                                                                 |          |                                            |                                                                                                                                                                                                                                                                                                                                                                                                                                                                                                                                                                                                                                  |                                   |                                                                                                                                                                                |
| D'Agostino 2017 | Post hoc analysis RCT (ACQUIRE)                                                                     | RA, abatacept 125 mg sc weekly and ~10mg/kg 4      | Explore the effect of baseline BMI on PK and clinical response                     | 1456 pts, age 47-51 years, female 79-85%, disease duration 6.9-8.3                                                              | 6 months | Drug level and BMI: <25, 25-30 and >30     | <p>BMI: 36% normal, 34% overweight, 30% obese.</p> <p>Steady state trough levels were higher for sc than for body weight tiered iv administration.</p>                                                                                                                                                                                                                                                                                                                                                                                                                                                                           | Quality in Prognosis Studies Tool | <p>1.Study participation: low</p> <p>2.Attrition: high</p> <p>3.Prognostic factor: ?</p> <p>4.Outcome: Low</p> <p>5.Confounding: high</p> <p>6.Statistics: low</p>             |

|                       |                                                             |                                                                |                                                                            |                                                                                                                                                                                   |           |                                |                                                                                                                                                                                                                                                                                                                                                                                                                                                                                                                                 |                                   |                                                                                                                                                                  |
|-----------------------|-------------------------------------------------------------|----------------------------------------------------------------|----------------------------------------------------------------------------|-----------------------------------------------------------------------------------------------------------------------------------------------------------------------------------|-----------|--------------------------------|---------------------------------------------------------------------------------------------------------------------------------------------------------------------------------------------------------------------------------------------------------------------------------------------------------------------------------------------------------------------------------------------------------------------------------------------------------------------------------------------------------------------------------|-----------------------------------|------------------------------------------------------------------------------------------------------------------------------------------------------------------|
|                       |                                                             | weekly iv according to body weight (< 60, 60-100 and > 100 kg) |                                                                            | years, DAS28CRP 6.2                                                                                                                                                               |           |                                | Median trough levels were numerically higher in the sc than in the IV group at 3 months: 33.4, 29.1 and 24.1 ug/ml vs. 19.6, 21.3 and 19.7 ug/ml for normal, overweight and obese, respectively, and at 6 months: 35.1, 29.0 and 24.1 ug/ml vs. 19.1, 20.0 and 19.8 ug/ml, for normal, overweight and obese, respectively (no statistical analysis).                                                                                                                                                                            |                                   |                                                                                                                                                                  |
| <b>TNF-INHIBITORS</b> |                                                             |                                                                |                                                                            |                                                                                                                                                                                   |           |                                |                                                                                                                                                                                                                                                                                                                                                                                                                                                                                                                                 |                                   |                                                                                                                                                                  |
| Goss 2018             | RCT, CONCERTO trial, multinational                          | RA, ADA, 4 different dosages of MTX (2,5 ; 5 ; 10 ; 20mg/wk)   | Effect of MTX on adalimumab pharmacokinetics                               | 395 patients, 52 years, 75% female                                                                                                                                                | 26 weeks  | adalimumab levels, body weight | For adalimumab concentration, body weight was a statistically significant explanatory variable (P = 0.0001), with a negative estimate of the regression coefficient.                                                                                                                                                                                                                                                                                                                                                            | Cochrane RoB2 for RCT             | Overall: low<br><br>Randomisation: Low<br>Intervention: low<br>Missing outcome data: low<br>Outcome measurement: low<br>Selective reporting: Low                 |
| Jani 2015             | Prospective observational cohort (BRAGGSS) multicentric, UK | RA ADA, ETN                                                    | Random drug levels, clinical response and adherence to therapy             | ADA 160 pts, age 56.2 years, 70% female, disease duration 8.6 years, DAS28 5.7, MTX 55%.<br><br>ETN 171 pts, 57 years, 80% female, disease duration 7,8 years, DAS28 5.9, MTX 46% | 12 months | Random (!) drug levels, BMI    | In analysis for predictors of low drug levels, for adalimumab, BMI (regression coefficient (rc) 0.055 95%CI 0.017-0.094, p=0.005) was one of the significant predictors.<br><br>In a model including both adalimumab and etanercept a BMI of $\geq 30$ was associated with low drug levels (rc 0.78 95%CI 0.37-1.18 p<0.0001)                                                                                                                                                                                                   | Quality in Prognosis Studies Tool | 1.Study participation: moderate<br>2.Attrition: moderate<br>3.Prognostic factor: moderate<br>4.Outcome: moderate<br>5.Confounding: moderate<br>6.Statistics: low |
| Dong 2019             | Prospective observational cohort, monocentric, China        | AS etanercept                                                  | To investigate the effective serum level of etanercept in patients with AS | 60 pts, 54/60 male, age 29 years, disease duration 4 years                                                                                                                        | 24 weeks  | drug levels, BMI               | Cut-off drug level values of effective (ASDAS-CRP < 2.1) etanercept treatment based on results of ROC curves at weeks 4, 12, and 24 were 2.32, 2.12, and 2.36 $\mu\text{g/mL}$ , respectively.<br><br>Patients with etanercept levels below these cut-off values had higher body mass index (BMI) values than those above the cut-off value (23.85 $\pm$ 4.14 vs 21.79 $\pm$ 3.35 kg/m <sup>2</sup> , p = 0.042) at treatment week 4 while there was no significant difference in BMI between the two groups at week 12 and 24. | Quality in Prognosis Studies Tool | 1.Study participation: moderate<br>2.Attrition: high<br>3.Prognostic factor: moderate<br>4.Outcome: Low<br>5.Confounding: high<br>6.Statistics: moderate         |

|            |                                           |               |                                                                 |                                                                                                                                              |     |                       |                                                                                                                                                                                                                                                                             |                                   |                                                                                                                                                     |
|------------|-------------------------------------------|---------------|-----------------------------------------------------------------|----------------------------------------------------------------------------------------------------------------------------------------------|-----|-----------------------|-----------------------------------------------------------------------------------------------------------------------------------------------------------------------------------------------------------------------------------------------------------------------------|-----------------------------------|-----------------------------------------------------------------------------------------------------------------------------------------------------|
| Rosas 2017 | Cross-sectional study, monocentric, Spain | AS adalimumab | To determine whether obesity affects serum levels of adalimumab | 57 pts, male 65%, age 47 years, BMI 27.6, disease duration 9.8 years, HLAB27 77%, treatment duration 1.44 years, BASDAI4.05, ASDAS(ESR) 2.36 | N/A | BMI, adalimumab level | Patients with BMI > 30 (n=15, 26%) had lower drug levels than patients with normal BMI < 25 (n=17, 30%): 5.0 (5.5) vs. 9.14 (4.3) mg/l, respectively, p=0.032. also, patients with BMI 25-30 (n=25, 44%) had higher trough levels than obese (BMI >30): 10.09 (5.9) p<0.01. | Quality in Prognosis Studies Tool | 1.Study participation: low<br>2.Attrition: high<br>3.Prognostic factor: moderate<br>4.Outcome: Low<br>5.Confounding: high<br>6.Statistics: moderate |
|------------|-------------------------------------------|---------------|-----------------------------------------------------------------|----------------------------------------------------------------------------------------------------------------------------------------------|-----|-----------------------|-----------------------------------------------------------------------------------------------------------------------------------------------------------------------------------------------------------------------------------------------------------------------------|-----------------------------------|-----------------------------------------------------------------------------------------------------------------------------------------------------|

**Methotrexate and other co-medication / DMARDs**

| Study             | Study design                                                      | Population                                                   | Scope/Intervention                                                     | Study population                                                                       | Follow-up | Outcome measures              | Results                                                                                                                                                                                                                                      | Tool used for RoB assessment      | Risk of Bias                                                                                                                                     |
|-------------------|-------------------------------------------------------------------|--------------------------------------------------------------|------------------------------------------------------------------------|----------------------------------------------------------------------------------------|-----------|-------------------------------|----------------------------------------------------------------------------------------------------------------------------------------------------------------------------------------------------------------------------------------------|-----------------------------------|--------------------------------------------------------------------------------------------------------------------------------------------------|
| <b>ADALIMUMAB</b> |                                                                   |                                                              |                                                                        |                                                                                        |           |                               |                                                                                                                                                                                                                                              |                                   |                                                                                                                                                  |
| Burmester 2015    | RCT, double blinded, parallel arm study, multinational (CONCERTO) | RA, ADA + 2.5, 5, 10 or 20 mg MTX                            | Clinical response and trough levels between different treatment groups | 395 pts, age 49-54 years, female 71-78%, disease duration 4 months, DAS28(CRP) 5.8-6.2 | 26 weeks  | MTX dose and ADA trough level | Mean trough concentration at week 26 were 4.4, 5.7, 6.5 and 6.9 mg/l with MTX doses of 2.5, 5, 10 and 20 mg, respectively. (no statistical analysis)                                                                                         | Cochrane RoB2 for RCT             | Overall: low<br><br>Randomisation: Low<br>Intervention: low<br>Missing outcome data: low<br>Outcome measurement: low<br>Selective reporting: Low |
| Goss 2018         | RCT, CONCERTO trial, multinational                                | RA, ADA, 4 different dosages of MTX (2,5 ; 5 ; 10 ; 20mg/wk) | Effect of MTX on adalimumab pharmacokinetics                           | 395 patients, 52 years, 75% female                                                     | 26 weeks  | adalimumab levels, MTX dose   | After week 4, mean adalimumab concentrations were higher in the 20 mg MTX dose group compared with the 2.5 mg MTX dose group (p= 0.001). However, there were no statistically significant differences between the 2 highest MTX dose levels. | Cochrane RoB2 for RCT             | Overall: low<br><br>Randomisation: Low<br>Intervention: low<br>Missing outcome data: low<br>Outcome measurement: low<br>Selective reporting: Low |
| Pouw 2015         | Prospective observational cohort, monocentric, the                | RA ADA                                                       | Determine the concentration-effect relationship of adalimumab in RA    | 221 pts, 54 years, 80% female, disease duration 8                                      | 28 weeks  | MTX dose and adalimumab level | Patients on adalimumab monotherapy had a median concentration of 4.1 ug/ml (IQR 1.3 – 7.7). Patients with concomitant MTX treatment had a median level of 7.4 ug/ml (IQR 5.3 – 10.6), p<0.001                                                | Quality in Prognosis Studies Tool | 1.Study participation: moderate<br>2.Attrition: high<br>3.Prognostic factor: low<br>4.Outcome: Low                                               |

|                   |                                                                |                     |                                                                   |                                                                                                              |          |                                                                                                          |                                                                                                                                                                                                                                                                                                                                                                                                                                                                                                                                                                                                                                                                                                                                                                                                                                                                                              |                                   |                                                                                                                                                     |
|-------------------|----------------------------------------------------------------|---------------------|-------------------------------------------------------------------|--------------------------------------------------------------------------------------------------------------|----------|----------------------------------------------------------------------------------------------------------|----------------------------------------------------------------------------------------------------------------------------------------------------------------------------------------------------------------------------------------------------------------------------------------------------------------------------------------------------------------------------------------------------------------------------------------------------------------------------------------------------------------------------------------------------------------------------------------------------------------------------------------------------------------------------------------------------------------------------------------------------------------------------------------------------------------------------------------------------------------------------------------------|-----------------------------------|-----------------------------------------------------------------------------------------------------------------------------------------------------|
|                   | Netherlands                                                    |                     |                                                                   | years, DAS28 5.3, MTX 77%                                                                                    |          |                                                                                                          | there was no significantly difference in trough levels between different methotrexate dose groups.                                                                                                                                                                                                                                                                                                                                                                                                                                                                                                                                                                                                                                                                                                                                                                                           |                                   | 5.Confounding: high<br>6.Statistics: low                                                                                                            |
| Vogelzang 2014    | Prospective observational cohort, monocentric, the Netherlands | PsA, adalimumab     | Association between adalimumab drug levels and disease activity   | 103 pts, male 53%, age 50 years, MTX 78%, disease duration 6 years, DAS28 4.0, PASI 0.6                      | 52 weeks | Drug level, MTX use                                                                                      | The median adalimumab concentration at 28 weeks for patients on monotherapy was significantly lower compared with patients using adalimumab and concomitant MTX (respectively, 0.7 mg/L, IQR 0.0–3.3 vs 8.4 mg/L, IQR 4.9–11.0), $p<0.001$ . At 52 weeks, patients on monotherapy had a median adalimumab concentration of 1.8 mg/L, IQR 0.0–3.5 compared with 8.8 mg/L, IQR 4.9–11.9 in patients treated with adalimumab and concomitant MTX ( $p<0.001$ ).                                                                                                                                                                                                                                                                                                                                                                                                                                 | Quality in Prognosis Studies Tool | 1.Study participation: high<br>2.Attrition: high<br>3.Prognostic factor: low<br>4.Outcome: Low<br>5.Confounding: moderate<br>6.Statistics: low      |
| Vogelzang 2015    | Prospective observational cohort, monocentric, the Netherlands | RA, PsA, adalimumab | Effect of concomitant DMARD treatment on adalimumab trough levels | 375 pts (272 RA, Bartelds 2011, 103 PsA, Vogelzang 2014)                                                     | 28 weeks | Concomitant DMARD therapy, trough level adalimumab                                                       | Four groups of adalimumab-treated patients were compared: monotherapy (n=67); concomitant MTX (n=224); concomitant other DMARDs (leflunomide, hydroxychloroquine, sulfasalazine or a combination of these, n=26) and MTX+other DMARDs (n=58).<br>Concentrations were significantly higher in patients with concomitant DMARD treatment compared with monotherapy: monotherapy versus other DMARDs, $p=0.011$ ; monotherapy versus MTX, $p<0.001$ ; and monotherapy versus MTX+other DMARDs, $p<0.001$ . There was no statistical difference between both MTX groups and the other DMARDs group ( $p=0.579$ (MTX vs other DMARDs) and $p=0.352$ (MTX +other DMARDs vs other DMARDs)).<br><br>Trough levels at week 4, 16 and 28: MTX 3.9, 7.1 and 7.4 mg/l; MTX + other DMARDs: 4.1, 7.4 and 6.8 mg/l; other DMARDs: 4.1, 5.4 and 4.9 mg/l; monotherapy: 2.4, 2.5 and 2.2 mg/l; respectively. | Quality in Prognosis Studies Tool | 1.Study participation: high<br>2.Attrition: high<br>3.Prognostic factor: low<br>4.Outcome: Low<br>5.Confounding: high<br>6.Statistics: low          |
| <b>INFLIXIMAB</b> |                                                                |                     |                                                                   |                                                                                                              |          |                                                                                                          |                                                                                                                                                                                                                                                                                                                                                                                                                                                                                                                                                                                                                                                                                                                                                                                                                                                                                              |                                   |                                                                                                                                                     |
| Mulleman 2011     | RCT, bicentric, France                                         | AS IFX              | The influence of MTX on infliximab exposure                       | 26 pts (12 vs. 14), 75-79% men, age 43-46 years, disease duration 4-4.5 years, HLAB27 71-75%, BASDAI 5.8-7.0 | 18 weeks | infliximab cumulative area under the concentration vs time curves between baseline and 18 weeks, MTX use | Two treatment groups, IFX+ MTX and IFX – MTX, did not differ in terms of AUC0-18, BASDAI or inflammation markers. The median AUC0-18 value was 165,502 mg/hour/L [50,569 to 203,782] for the infliximab-only group and 164,222 mg/hour/L [102,165 to 295,858] for the infliximab + MTX group.                                                                                                                                                                                                                                                                                                                                                                                                                                                                                                                                                                                                | Quality in Prognosis Studies Tool | 1.Study participation: moderate<br>2.Attrition: high<br>3.Prognostic factor: moderate<br>4.Outcome: Low<br>5.Confounding: high<br>6.Statistics: low |

|                                                           |                                                         |               |                                                                                                                                                 |                                                                                                                                                |                                                                                               |                                                                                                                   |                                                                                                                                                                                                                                                                                                                                                                |                                   |                                                                                                                                                                                |
|-----------------------------------------------------------|---------------------------------------------------------|---------------|-------------------------------------------------------------------------------------------------------------------------------------------------|------------------------------------------------------------------------------------------------------------------------------------------------|-----------------------------------------------------------------------------------------------|-------------------------------------------------------------------------------------------------------------------|----------------------------------------------------------------------------------------------------------------------------------------------------------------------------------------------------------------------------------------------------------------------------------------------------------------------------------------------------------------|-----------------------------------|--------------------------------------------------------------------------------------------------------------------------------------------------------------------------------|
| Martinez-Feito FRI0399 (2019)                             | Abstract EULAR 2019, observational study                | IFX axSpA     | To identify clinical and serological variables that can predict clinical response                                                               | 81 pts                                                                                                                                         | 24 weeks                                                                                      | drug levels, MTX use                                                                                              | Patients with concomitant MTX had higher serum IFX trough levels (median and IQR) than patients without MTX and these differences were significant at W6: 26.37 (16-41.4) vs. 16.9(11.4-26.9); p=0.008; at W14: 8.4(5.4-13.9) versus 4.1(1.8-7.8); p=0.003 and at W22: 5.1(2.2-8.3) versus 3.1(0.6-5.4); p=0.006 and; respectively).                           | Quality in Prognosis Studies Tool | 1.Study participation: high<br>2.Attrition: high<br>3.Prognostic factor: high<br>4.Outcome: Low<br>5.Confounding: moderate<br>6.Statistics: moderate                           |
| <b>GOLIMUMAB</b>                                          |                                                         |               |                                                                                                                                                 |                                                                                                                                                |                                                                                               |                                                                                                                   |                                                                                                                                                                                                                                                                                                                                                                |                                   |                                                                                                                                                                                |
| Zhuang 2012                                               | Open label, randomised phase 1 study, multicentric, USA | RA golimumab  | Evaluating the effect of concomitant methotrexate use on golimumab pharmacokinetics                                                             | 49 pts, 33 sc, 16 iv. age 55.8 years, female 76%, disease duration 9.4 years                                                                   | 30 weeks for SC group (20 weeks of treatment & 10 of follow up)<br><br>24 weeks for IV groups | PK parameters (maximal concentration (Cmax) and area under the concentration time curve 0-28 days (AUC0-28d), MTX | For patients treated with golimumab sc: Mean serum golimumab concentrations appeared to be higher in patients treated with concomitant MTX. The mean Cmax and AUC0-28d at steady state were 24% and 37% higher, respectively, in patients who received concomitant MTX than in patients who did not receive MTX. (no statistics)                               | Cochrane RoB2 for RCT             | Overall: some concerns<br><br>Randomisation: Low<br>Intervention: some concerns<br>Missing outcome data: low<br>Outcome measurement: some concerns<br>Selective reporting: Low |
| <b>RHEUMATOID ARTHRITIS AND TNF-INHIBITORS (ADA, IFX)</b> |                                                         |               |                                                                                                                                                 |                                                                                                                                                |                                                                                               |                                                                                                                   |                                                                                                                                                                                                                                                                                                                                                                |                                   |                                                                                                                                                                                |
| Martinez-feito 2019                                       | Observational cohort, monocentric, Spain                | RA ADA or IFX | Association between drug level and concomitant use of MTX or other DMARDs                                                                       | 25 ADA, 67 IFX, monotherapy n=12, MTX n=59, other DMARD n=21<br><br>Age 52-64, female 58-88%, disease duration 8-10 years, DAS28 5-5.3         | 1 year                                                                                        | Detectable drug level at 1 year, monotherapy, combination with MTX or other DMARD                                 | Proportion of patients with detectable drug at 1 year: monotherapy: 9%; +MTX: 71%; + other DMARD: 20%. This was mainly true for patients with MTX >15 mg/wk (54%) vs. MTX<15mg/wk (17%)<br><br>The OR for maintaining drug levels with vs. without MTX was 2.3, p=0.06.<br>The OR for maintaining drug level with MTX>15mg/wk vs. monotherapy was 4.9, p=0.02. | Quality in Prognosis Studies Tool | 1.Study participation: low<br>2.Attrition: high<br>3.Prognostic factor: low<br>4.Outcome: Low<br>5.Confounding: high<br>6.Statistics: low                                      |
| Eng 2016                                                  | Observational cohort, Japan                             | RA ADA, IFX   | To explore the impact of treatment with TNF inhibitors on levels of soluble biomarkers in RA and to identify predictors of impaired drug levels | ADA: 15 pts, 27% male, age 53 years, MTX 47%, disease duration 5 years, DAS28(CRP) 5.0, CRP 6<br>IFX: 11 pts, 36% male, age 54 years, MTX 72%, | 6 months                                                                                      | Detectable or undetectable drug level with detection limit of 0.7 ug/ml for both drugs                            | Patients with detectable drug at 6 months of treatment numerically less often used concomitant MTX (50 vs. 83%, p=0.197), however the median dose of methotrexate was numerically higher in the group of patients with detectable drug levels (18.75 mg/week vs. 10 mg/wk, p=0.214)                                                                            | Quality in Prognosis Studies Tool | 1.Study participation: low<br>2.Attrition: high<br>3.Prognostic factor: moderate<br>4.Outcome: Low<br>5.Confounding: high<br>6.Statistics: moderate                            |

|  |  |  |  |                                                 |  |  |  |  |  |
|--|--|--|--|-------------------------------------------------|--|--|--|--|--|
|  |  |  |  | disease duration 6 years, DAS28(CRP) 5.3, CRP 4 |  |  |  |  |  |
|--|--|--|--|-------------------------------------------------|--|--|--|--|--|

**Route of administration**

| Study          | Study design                                                                | Population                                         | Scope/Intervention                                                                                                                                                                                   | Study population                                                                                           | Follow-up | Outcome measures                      | Results                                                                                                                                                                                                                                                         | Tool used for RoB assessment | Risk of Bias                                                                                                                                 |
|----------------|-----------------------------------------------------------------------------|----------------------------------------------------|------------------------------------------------------------------------------------------------------------------------------------------------------------------------------------------------------|------------------------------------------------------------------------------------------------------------|-----------|---------------------------------------|-----------------------------------------------------------------------------------------------------------------------------------------------------------------------------------------------------------------------------------------------------------------|------------------------------|----------------------------------------------------------------------------------------------------------------------------------------------|
| Abdallah 2017  | Pooled data RCTs (SUMMACT A and BREVACTA), population pharmacokinetic model | RA, tocilizumab after inadequate DMARD response    | PK/PD sc tocilizumab                                                                                                                                                                                 | N/A (supp tab S1)                                                                                          | 24 weeks  | Drug level, iv and sc administration  | Mean steady state TCZ iv 8 mg/kg every 4 weeks at 24 weeks was 18 ug/ml. For sc dosing 162 mg weekly: 40 ug/ml. (no statistics)                                                                                                                                 | Cochrane RoB2 for RCT        | Overall: low<br>Randomisation: Low<br>Intervention: low<br>Missing outcome data: low<br>Outcome measurement: low<br>Selective reporting: Low |
| Burmester 2014 | Randomised controlled trial, double blind, multicenter, (SUMMACT A)         | RA, tocilizumab sc 162mg/week or iv 8mg/kg/4 weeks | To compare the efficacy and safety of sc vs. iv tocilizumab in RA                                                                                                                                    | 1095 pts (558 sc, 537 iv), female 82%, age 52 years, disease duration 8.7 years, DAS28 6.6-6.7, MTX 80-82% | 24 weeks  | Trough level, route of administration | The observed steady-state Ctrough ( $\pm$ SD) at week 24 was 42 ( $\pm$ 27.4) $\mu$ g/mL, following tocilizumab-SC dosing and 18 ( $\pm$ 14.2) $\mu$ g/mL following, tocilizumab-IV dosing. (no statistics)                                                     | Cochrane RoB2 for RCT        | Overall: low<br>Randomisation: Low<br>Intervention: low<br>Missing outcome data: low<br>Outcome measurement: low<br>Selective reporting: Low |
| Ogata 2014     | Subanalyses of double-blind, parallel-group, comparative phase III study    | RA pts treated with TCZ                            | Patients randomized 1:1 into 2 groups: 162 mg of TCZ-SC monotherapy every 2 weeks plus placebo TCZ-IV every 4 weeks or 8 mg/kg of TCZ-IV monotherapy every 4 weeks plus placebo TCZ-SC every 2 weeks | 346 pts<br>Mean age: 52<br>% male: 16                                                                      | 24 weeks  | Serum TCZ concentrations              | Mean trough TCZ concentrations were similar between the groups over time and proportion with TCZ $\geq$ 1 $\mu$ g/mL were similar.<br><br>Mean $\pm$ SD TCZ trough levels:<br>TCZ-SC mono: 10.6 $\pm$ 7.8 $\mu$ g/ml<br>TCZ-IV mono: 12.4 $\pm$ 7.9 $\mu$ g/ml. | Cochrane RoB2 for RCT        | Overall: low<br>Randomisation: Low<br>Intervention: low<br>Missing outcome data: low<br>Outcome measurement: low<br>Selective reporting: Low |

|               |                                                             |                         |                                                       |                                         |          |                           |                                                                                                                                                                                                                                                                     |                       |                                                                                                                                                                  |
|---------------|-------------------------------------------------------------|-------------------------|-------------------------------------------------------|-----------------------------------------|----------|---------------------------|---------------------------------------------------------------------------------------------------------------------------------------------------------------------------------------------------------------------------------------------------------------------|-----------------------|------------------------------------------------------------------------------------------------------------------------------------------------------------------|
| Iwahashi 2014 | Subanalyses of phase II/III, randomized, double blind study | RA pts treated with ABT | ABT IV 10 mg/kg every four weeks or SC 162 mg weekly. | 118 pts<br>Mean age: 55.6<br>% male: 27 | 6 months | Serum ABT (Cmax and Cmin) | Geometric means for Cmax and Cmin (d 169):<br>SC: 42.6 µg/mL and 36.0 µg/mL<br>IV: 277.4 µg/mL and 16.7 µg/mL.<br>Large variation in intra-individual serum ABT levels within the 4 week interval for iv. administration. Small variation for sc (7 days interval). | Cochrane RoB2 for RCT | Overall: some concerns<br>Randomisation: some concerns<br>Intervention: low<br>Missing outcome data: low<br>Outcome measurement: low<br>Selective reporting: Low |
|---------------|-------------------------------------------------------------|-------------------------|-------------------------------------------------------|-----------------------------------------|----------|---------------------------|---------------------------------------------------------------------------------------------------------------------------------------------------------------------------------------------------------------------------------------------------------------------|-----------------------|------------------------------------------------------------------------------------------------------------------------------------------------------------------|

**Dosing – interval**

| Study          | Study design                                                                               | Population    | Scope/Intervention                                                                                      | Study population                                                                                                                 | Follow-up | Outcome measures             | Results                                                                                                                                                                                                                                   | Tool used for RoB assessment      | Risk of Bias                                                                                                                                                               |
|----------------|--------------------------------------------------------------------------------------------|---------------|---------------------------------------------------------------------------------------------------------|----------------------------------------------------------------------------------------------------------------------------------|-----------|------------------------------|-------------------------------------------------------------------------------------------------------------------------------------------------------------------------------------------------------------------------------------------|-----------------------------------|----------------------------------------------------------------------------------------------------------------------------------------------------------------------------|
| l'Ami 2018     | Randomised controlled trial, parallel group, non-inferiority, monocentric, the Netherlands | RA ADA        | Non-inferiority of lowering adalimumab dose to 40 mg every 3 weeks vs. remaining on 40 mg every 2 weeks | 54 pts, age 58-60 years, female 93-96%, treatment duration 5.5-6 years, MTX use 93-96%, disease duration 11 years, DAS28 1.6-2.0 | 6 months  | Drug level and dose interval | Disease activity remained stable in both groups, ADA levels decrease from 10.6±2.5 ug/ml to 6.6±2.2 ug/ml after dose interval prolongation. ADA level remained stable in the continuous group: 10.4±2.4 ug/ml and 9.3±3.0 ug/ml, p=0.001. | Cochrane RoB2 for RCT             | Overall: some concerns<br>Randomisation: Low<br>Intervention: some concerns<br>Missing outcome data: low<br>Outcome measurement: some concerns<br>Selective reporting: Low |
| Bartelds 2007  | Prospective observational cohort, monocentric, the Netherlands                             | RA ADA        | Association antibodies with drug level and clinical response                                            | 121 pts, 79% female, age 53, baseline DAS28 5.3, diseases duration 12 years, MTX use 79%                                         | 28 weeks  | Drug levels, drug dose       | Adalimumab concentrations significantly increased after dose increase to 40 mg weekly (p=0.043).<br>Mean concentration before: 2.0 mg/l<br>Mean concentration after: 15.0 mg/l                                                            | Quality in Prognosis Studies Tool | 1.Study participation: moderate<br>2.Attrition: moderate<br>3.Prognostic factor: high<br>4.Outcome: Low<br>5.Confounding: high<br>6.Statistics: low                        |
| Siljehult 2018 | Prospective observational cohort, multicentric, Sweden                                     | RA infliximab | Correlation between drug levels and clinical response                                                   | 94 pts, female 83%, age disease onset 42 years, disease duration 14 years, DAS28 5.6, MTX 77%, IFX                               | 52 weeks  | Dose, infliximab levels      | There was no correlation between the dose in mg/kg and the measured concentration of IFX at either 14 or 52 weeks. The dose of infliximab only increased modestly from 3.24 to 3.54 mg/kg.                                                | Quality in Prognosis Studies Tool | 1.Study participation: moderate<br>2.Attrition: high<br>3.Prognostic factor: moderate<br>4.Outcome: moderate<br>5.Confounding: high<br>6.Statistics: moderate              |

|                 |                                                                                                |                                                                    |                                                                                                                                                |                                                                                                      |           |                                                                   |                                                                                                                                                                                                                                                                                                                                                                                                                                                                                             |                                   |                                                                                                                                                                                |
|-----------------|------------------------------------------------------------------------------------------------|--------------------------------------------------------------------|------------------------------------------------------------------------------------------------------------------------------------------------|------------------------------------------------------------------------------------------------------|-----------|-------------------------------------------------------------------|---------------------------------------------------------------------------------------------------------------------------------------------------------------------------------------------------------------------------------------------------------------------------------------------------------------------------------------------------------------------------------------------------------------------------------------------------------------------------------------------|-----------------------------------|--------------------------------------------------------------------------------------------------------------------------------------------------------------------------------|
|                 |                                                                                                |                                                                    |                                                                                                                                                | dose 3.3 ( $\pm$ 0.6) mg/kg                                                                          |           |                                                                   |                                                                                                                                                                                                                                                                                                                                                                                                                                                                                             |                                   |                                                                                                                                                                                |
| Takeuchi 2017   | Randomized controlled trial, RISING study, Japan                                               | RA infliximab (week 0 - 14: 3 mg/kg, week 14-46: 3, 6 or 10 mg/kg) | Correlation between baseline anti-ccp and RF and drug levels                                                                                   | 307 pts, age 49-50, disease duration 7.2-8.4 years, female 79-86%, DAS28crp 5.38-5.59                | 54 weeks  | Infliximab trough levels, dose                                    | The median (interquartile range, IQR) trough serum levels at week 54 in the 3, 6, and 10 mg/kg groups were 0.4 (<0.1, 1.5), 2.3 (0.3, 4.7), and 5.5 (1.5, 9.0) ug/ml, respectively, showing dose dependency. (no statistics)                                                                                                                                                                                                                                                                | Quality in Prognosis Studies Tool | 1.Study participation: high<br>2.Attrition: high<br>3.Prognostic factor: high<br>4.Outcome: Low<br>5.Confounding: high<br>6.Statistics: moderate                               |
| St Clair 2002   | Subanalyses of RCT                                                                             | RA pts with active disease treated with IFX                        | PK-model for a 70-kg individual receiving 3 mg/kg IFX every 8 weeks.<br><br>Preinfusion measurements at weeks 2, 6, 14, 22, 30, 38, 46, and 54 | 428 pts                                                                                              | 54 weeks  | Serum infliximab                                                  | PK-model :<br><br>1. 100-mg increase in IFX dose would raise the trough level from 0.8 $\mu$ g/ml to 1.8 $\mu$ g/ml.<br><br>2. Change in interval from 8 weeks to 6 weeks while maintaining a 3 mg/kg dose would increase the trough level from 0.8 $\mu$ g/ml to 2.8 $\mu$ g/ml.<br><br>Observed median trough serum IFX in the group receiving 3 mg/kg every 4 weeks; range from 7.6 $\mu$ g/ml to 8.8 $\mu$ g/ml, a 3-fold increment in trough levels compared with the 6-week interval. | Cochrane RoB2 for RCT             | Overall: some concerns<br><br>Randomisation: Low<br>Intervention: some concerns<br>Missing outcome data: low<br>Outcome measurement: some concerns<br>Selective reporting: Low |
| Westhovens 2015 | Randomised controlled trial, multicenter, double blind (follow-up study of 2-year AGREE study) | RA abatacept iv 10 mg/kg or 5 mg/kg                                | Impact on disease activity of reduced dose of abatacept                                                                                        | 108 pts, age 50-51 years, female 76-82%, disease duration 2.2-2.4 years, DAS28crp 2.1                | 12 months | Drug dose and drug level (trough, Cmin)                           | In the reduced abatacept dose group (~5 mg/kg), consistent Cmin was achieved between month 3 and month 6, with geometric mean Cmin ranging from 8.8 mg/mL to 12.0 mg/mL; the range was 20.3 mg/mL to 24.1 mg/mL during follow-up in the ~10 mg/kg abatacept group. (no statistics)                                                                                                                                                                                                          | Cochrane RoB2 for RCT             | Overall: low<br><br>Randomisation: Low<br>Intervention: low<br>Missing outcome data: low<br>Outcome measurement: low<br>Selective reporting: Low                               |
| Bastida 2018    | Population pharmacokinetic analysis, data from prospective                                     | RA, tocilizumab iv, 4, 6 and 8 mg/kg every 4 weeks                 | Provide scientific rationale for body weighted dosing                                                                                          | 35 patients, 88% female, age 54 years, weight 63.5 kg, height 161 cm, disease duration 11 years, 75% | N/A       | Area under the curve concentration, fixed vs. weight based dosing | 19 patients on 8 mg/kg every 4 weeks, 8 each on 4 and 6 mg/kg/4wks, respectively.                                                                                                                                                                                                                                                                                                                                                                                                           | Quality in Prognosis Studies Tool | 1.Study participation: moderate<br>2.Attrition: high<br>3.Prognostic factor: low<br>4.Outcome: Low<br>5.Confounding: moderate<br>6.Statistics: low                             |

|                     |                                                            |                  |                                                                                                              |                            |           |                              |                                                                                                                                                                                                                                 |                       |                                                                                                                                                                         |
|---------------------|------------------------------------------------------------|------------------|--------------------------------------------------------------------------------------------------------------|----------------------------|-----------|------------------------------|---------------------------------------------------------------------------------------------------------------------------------------------------------------------------------------------------------------------------------|-----------------------|-------------------------------------------------------------------------------------------------------------------------------------------------------------------------|
|                     | observational cohort, monocentric, Spain                   |                  |                                                                                                              | cotreatment MTX, DAS28 2,2 |           |                              | Usual 8mg/kg/4w reached target (defined as a cAUC (area under the curve concentration) at 24 weeks of treatment >100 × 103 µg/ml) in 99,8%.<br><br>With reduced dosing (6 mg/kg), lower percentage (90.5%) achieves the target. |                       |                                                                                                                                                                         |
| l'Ami OP0209 (2020) | EULAR abstract, randomized controlled trial, single center | ETN RA, PsA, SpA | Comparing the rate of maintenance of Minimal Disease Activity of standard dosing vs. doubled dosing interval | 160 pts                    | 18 months | Dosing interval, drug levels | Median etanercept concentrations decreased from 1.50 µg/mL (25-75 th percentile 1.06-2.65) to 0.46 µg/mL (0.28-0.92) after 6 months of interval prolongation (ETN 50 mg every two weeks).                                       | Cochrane RoB2 for RCT | Overall: high<br><br>Randomisation: some concerns<br>Intervention: high<br>Missing outcome data: high<br>Outcome measurement: some concerns<br>Selective reporting: Low |

**Trough vs. non-trough**

| Study       | Study design                                                                                                                                                  | Population     | Scope/Intervention                                                                                                                                     | Study population                                                                                                                                                        | Follow-up | Outcome measures                       | Results                                                                                                                                                                                                                                                       | Tool used for RoB assessment      | Risk of Bias                                                                                                                                           |
|-------------|---------------------------------------------------------------------------------------------------------------------------------------------------------------|----------------|--------------------------------------------------------------------------------------------------------------------------------------------------------|-------------------------------------------------------------------------------------------------------------------------------------------------------------------------|-----------|----------------------------------------|---------------------------------------------------------------------------------------------------------------------------------------------------------------------------------------------------------------------------------------------------------------|-----------------------------------|--------------------------------------------------------------------------------------------------------------------------------------------------------|
| Bouman 2017 | Combined study: Patients from the intervention arm of an open RCT investigating non-inferiority of a dose reduction strategy (ADA / ETN) and patients from an | ADA ETN IFX RA | Association between drug level and successful dose reduction (increase interval for ADA & ETN, dose reduction for IFX) and discontinuation of the drug | ADA 42 pts ETN 76 pts IFX 51 pts. Age 58-61 years, 57-64% female, disease duration 7.5 – 13 years, DAS28 2.4-2.6, duration current treatment: 2.9-5.6 years, MTX 45-68% | 18 months | Mean drug level and timing of sampling | ADA: Peak (n=11) 8.5 ug/ml; intermediate (n=22) 7.7 ug/ml; trough (n=9) 6.7 ug/ml. All ns.<br><br>ETN: peak (n=25) 2.4 ug/ml; intermediate (n=28) 2.5 ug/ml; trough (23) 1.7 ug/ml. trough levels were significantly lower than intermediate and peak levels. | Quality in Prognosis Studies Tool | 1.Study participation: moderate<br>2.Attrition: moderate<br>3.Prognostic factor: moderate<br>4.Outcome: Low<br>5.Confounding: high<br>6.Statistics:low |

|                         |                                                            |        |                                                                                                        |                            |                  |                                                      |                                                                                                                                                                                                                                                                                                                                                                                                                                                                                                                                                                                                                                                                                    |                                   |                                                                                                                                               |
|-------------------------|------------------------------------------------------------|--------|--------------------------------------------------------------------------------------------------------|----------------------------|------------------|------------------------------------------------------|------------------------------------------------------------------------------------------------------------------------------------------------------------------------------------------------------------------------------------------------------------------------------------------------------------------------------------------------------------------------------------------------------------------------------------------------------------------------------------------------------------------------------------------------------------------------------------------------------------------------------------------------------------------------------------|-----------------------------------|-----------------------------------------------------------------------------------------------------------------------------------------------|
|                         | observational down titration study of IFX, the Netherlands |        |                                                                                                        |                            |                  |                                                      |                                                                                                                                                                                                                                                                                                                                                                                                                                                                                                                                                                                                                                                                                    |                                   |                                                                                                                                               |
| Hooijberg AB0382 (2019) | Abstract EULAR 2019, observational cohort                  | RA ADA | To assess the effect of non-trough measurements, compared to trough measurements, on serum drug level. | 121 pts (310 measurements) | Median 156 weeks | Drug level and timing of sampling between injections | The median drug level during adalimumab treatment was 6.6 (IQR 4.2-9.8) µg/ml, and the median number of days between the previous injection of adalimumab and serum sampling was 8 (5-13).<br>The first quartile (median 2 (IQR 1-3) days) had a median drug level of 8.0 (4.7-11.0) µg/ml, the second quartile (7 (6-8) days) of 6.9 (5.4-10.0) µg/ml, the third quartile (11 (10-12) days) of 6.1 (3.4-9.5) µg/ml, and the fourth quartile (14 (13-14) days) of 5.7 (3.1-8.5) µg/ml. A weak association was found between the number of days between the previous injection of adalimumab and serum sampling and adalimumab drug level (Spearman's $\rho$ : -0.182, $p=0.001$ ). | Quality in Prognosis Studies Tool | 1.Study participation: high<br>2.Attrition: high<br>3.Prognostic factor: ?<br>4.Outcome: Low<br>5.Confounding: high<br>6.Statistics: moderate |

**CRP – ESR – Calprotectin**

| Study          | Study design                                                  | Population | Scope/Intervention                                                      | Study population                                                                              | Follow-up | Outcome measures         | Results                                                                                                                                                                                                                               | Tool used for RoB assessment      | Risk of Bias                                                                                                                                                     |
|----------------|---------------------------------------------------------------|------------|-------------------------------------------------------------------------|-----------------------------------------------------------------------------------------------|-----------|--------------------------|---------------------------------------------------------------------------------------------------------------------------------------------------------------------------------------------------------------------------------------|-----------------------------------|------------------------------------------------------------------------------------------------------------------------------------------------------------------|
| Daien 2012     | Prospective observational cohort (pilot), monocentric, France | RA ETN     | Explore predictive value of etanercept levels for response to treatment | 19 pts, all female, age 56 years, disease duration 5 years, DAS28 4.85, MTX 12 pts, LEF 5 pts | 6 months  | drug level, CRP          | CRP changes between baseline and 3 months tended to correlate negatively with ETN concentrations at 3 months ( $r=0.46$ , $p=0.08$ ), and correlated significantly with change between baseline and 6 months ( $r=0.73$ , $p=0.004$ ) | Quality in Prognosis Studies Tool | 1.Study participation: high<br>2.Attrition: low<br>3.Prognostic factor: low<br>4.Outcome: Low<br>5.Confounding: high<br>6.Statistics: low                        |
| Kneepkens 2014 | Observational cohort, multicentric, the Netherlands, Spain    | RA GLM     | Association between drug level and clinical response                    | 37 pts, 52 years, 84% female, disease duration 12 years, DAS28 4.4 MTX 65%                    | 1 year    | CRP, ESR and drug levels | After adjustment for baseline values, a statistically significant inverse association between golimumab level and CRP and ESR was observed. $rc = -0.046$ (-0.60 to -0.28) and $rc = -9.03$ (-14.2 to -3.9), respectively.            | Quality in Prognosis Studies Tool | 1.Study participation: moderate<br>2.Attrition: moderate<br>3.Prognostic factor: moderate<br>4.Outcome: moderate<br>5.Confounding: moderate<br>6.Statistics: low |

|                |                                                                             |                            |                                                                                                                              |                                                                                             |                                                                                              |                                                                                                               |                                                                                                                                                                                                                                                                                                                                                                                                                                              |                                   |                                                                                                                                                                                |
|----------------|-----------------------------------------------------------------------------|----------------------------|------------------------------------------------------------------------------------------------------------------------------|---------------------------------------------------------------------------------------------|----------------------------------------------------------------------------------------------|---------------------------------------------------------------------------------------------------------------|----------------------------------------------------------------------------------------------------------------------------------------------------------------------------------------------------------------------------------------------------------------------------------------------------------------------------------------------------------------------------------------------------------------------------------------------|-----------------------------------|--------------------------------------------------------------------------------------------------------------------------------------------------------------------------------|
| Zhuang 2012    | Open label, randomised phase 1 study, multicentric, USA                     | RA golimumab               | Evaluating the effect of concomitant methotrexate use on golimumab pharmacokinetics                                          | 49 pts, 33 sc, 16 IV. AGE 55.8 years, female 76%, disease duration 9.4 years                | 30 weeks for SC group (20weeks of treatment & 10 of follow up)<br><br>24 weeks for IV groups | PK parameters (area under the concentration time curve 0-28 days (AUC0-28d), maximal concentration Cmax), CRP | Serum golimumab concentrations in patients with elevated CRP ( $\geq 10$ mg/L) were generally lower than in patients with normal CRP ( $< 10$ mg/L). Mean (SD) Cmax and AUC0-28d values after the first dose were 3.1 (1.9) ug/mL and 34.8 (17.5) ug-day/mL, respectively, in patients with baseline CRP levels $\geq 10$ mg/L and 6.2 (3.4) ug/mL and 92.9 (42.7) ug-day/mL, respectively, in patients with baseline CRP levels $< 10$ mg/L | Cochrane RoB2 for RCT             | Overall: some concerns<br><br>Randomisation: Low<br>Intervention: some concerns<br>Missing outcome data: low<br>Outcome measurement: some concerns<br>Selective reporting: Low |
| Wolbink 2005   | Prospective observational cohort, monocentric, the Netherlands              | RA infliximab              | Relationship between serum trough infliximab, clinical response and CRP                                                      | 105 pts, female 83%, age 56 years, disease duration 12 years, MTX 86/105, DAS28 6.1         | 14 weeks                                                                                     | drug level. CRP                                                                                               | Pretreatment CRP levels negatively correlated with serum infliximab levels at 2 weeks ( $r = -0.34$ , $p < 0.001$ ), 6 weeks ( $r = -0.46$ , $p < 0.001$ ), and 14 weeks ( $r = -0.43$ , $p < 0.001$ )                                                                                                                                                                                                                                       | Quality in Prognosis Studies Tool | 1.Study participation: low<br>2.Attrition: high<br>3.Prognostic factor: moderate<br>4.Outcome: low<br>5.Confounding: moderate<br>6.Statistics: low                             |
| Marsman 2016   | Observational cohort, multicentric, the Netherlands and Taiwan              | AS ADA                     | To determine the concentration-effect relationship of ADA in AS                                                              | 102 pts, 42 years, 67% male, disease duration 7 years, HLAB27 83%, ASDAScrp 3.4, BASDAI 6.2 | 6 months                                                                                     | CRP, drug level                                                                                               | Median drug level in patients with low ( $< 10$ mg/l) baseline CRP was higher (10.6 (3.9-16.2)) than for patients with high ( $\geq 10$ mg/l) baseline CRP (6.9 (1.0-12.6)) $p = 0.019$ .                                                                                                                                                                                                                                                    | Quality in Prognosis Studies Tool | 1.Study participation: moderate<br>2.Attrition: high<br>3.Prognostic factor: moderate<br>4.Outcome: moderate<br>5.Confounding: high<br>6.Statistics: low                       |
| Thurlings 2010 | Perspective observational cohort, bicentric (AMC and LUMC), the Netherlands | RA, rituximab (2x 1000 mg) | Whether persistence of synovial B lineage cells and lack of clinical response are associated with low rituximab serum levels | 58pts, female 71-80%, DAS28 6.0-6.5, MTX 75-100%                                            | 24 weeks                                                                                     | Levels at week 4, 12/16 and 24, ESR                                                                           | Baseline erythrocyte sedimentation rate negatively predicted rituximab levels at week 4 (AMC cohort, $n = 30$ : $r^2 = 20.17$ , $p = 0.018$ ; LUMC cohort, $n = 28$ : $r^2 = 20.23$ , $p = 0.007$ ).                                                                                                                                                                                                                                         | Quality in Prognosis Studies Tool | 1.Study participation: high<br>2.Attrition: high<br>3.Prognostic factor: high<br>4.Outcome: high<br>5.Confounding: high<br>6.Statistics: moderate                              |

|                     |                                           |                                             |                                                                                                  |                                                                                                                                                                                                                             |     |                             |                                                                                                                                                                                                       |                                     |                                                                    |
|---------------------|-------------------------------------------|---------------------------------------------|--------------------------------------------------------------------------------------------------|-----------------------------------------------------------------------------------------------------------------------------------------------------------------------------------------------------------------------------|-----|-----------------------------|-------------------------------------------------------------------------------------------------------------------------------------------------------------------------------------------------------|-------------------------------------|--------------------------------------------------------------------|
| Inciarte-Mundo 2016 | Cross-sectional study, monocentric, Spain | RA, PsA, infliximab, etanercept, adalimumab | To analyze the accuracy of calprotectin and TNF1 trough serum levels in detecting PDUS synovitis | RA: 42 pts, 81% female, age 64 years, disease duration 16 years, treatment duration 83 months, DAS28 2.31<br><br>PsA: 50 pts, female 50%, age 55 years, disease duration 15 years, treatment duration 58 months, DAS28 1.82 | N/A | Trough levels, calprotectin | Calprotectin inversely correlated with ADA ( $\rho = -0.461$ , $p = 0.008$ ) and ETN ( $\rho = -0.436$ , $p = 0.005$ ) trough serum levels, although non-significant correlations were found for IFX. | Newcastle-Ottawa for cohort studies | Sum score: *,*,*<br>Selection: *<br>Comparability: -<br>Outcome: * |
|---------------------|-------------------------------------------|---------------------------------------------|--------------------------------------------------------------------------------------------------|-----------------------------------------------------------------------------------------------------------------------------------------------------------------------------------------------------------------------------|-----|-----------------------------|-------------------------------------------------------------------------------------------------------------------------------------------------------------------------------------------------------|-------------------------------------|--------------------------------------------------------------------|

**Multivariable analyses – multiple variables**

| Study         | Study design                                                      | Population                    | Scope/Intervention                                                                                                                                     | Study population                                                                                                          | Follow-up | Outcome measures                                          | Results                                                                                                                                                                                                                                                                                                                                              | Tool used for RoB assessment      | Risk of Bias                                                                                                                                          |
|---------------|-------------------------------------------------------------------|-------------------------------|--------------------------------------------------------------------------------------------------------------------------------------------------------|---------------------------------------------------------------------------------------------------------------------------|-----------|-----------------------------------------------------------|------------------------------------------------------------------------------------------------------------------------------------------------------------------------------------------------------------------------------------------------------------------------------------------------------------------------------------------------------|-----------------------------------|-------------------------------------------------------------------------------------------------------------------------------------------------------|
| Dervieux 2012 | Cross-sectional study                                             | RA IFX (median 6 mg/kg/8 wks) | Correlation between drug level, MTX polyglutamates (PG) and disease activity                                                                           | 61 pts, 64 years, 77% female, disease duration 11 years, MTX dose 15 (10-20) mg, treatment duration 70 months, CDAI 8     | N/A       | Drug level, MTX PG, disease activity, MTX therapy         | In a multivariate linear regression analysis, lower IFX levels associated with lower infliximab doses ( $p < 0.001$ ), lower MTX PG levels ( $p = 0.032$ ), presence of ADAb ( $p = 0.029$ ) and shorter duration of MTX therapy ( $p = 1.0$ ). Nearly 50% of the variance in IFX trough levels could be explained by these 4 independent variables. | Quality in Prognosis Studies Tool | 1. Study participation: moderate<br>2. Attrition: ?<br>3. Prognostic factor: ?<br>4. Outcome: low<br>5. Confounding: high<br>6. Statistics: low       |
| Jani 2020     | Prospective observational cohort study, multicenter (UK), OUTPASS | PsA, ETN, ADA                 | 1- whether the presence of ADAb/drug levels predicts treatment response 2- identify a drug level threshold for optimal therapeutic response 3- factors | ADA 97 pts, ETN 56 pts, age 51 yrs, BMI 28.9, female gender 46%, disease duration 5 yrs, DAS28: 4.9, CRP 7.5, MTX use 25% | 12 months | Adalimumab concentrations, disease activity (DAS28 (crp)) | Factors that were inversely associated with ADA drug levels were ADAb level ( $\beta = -0.0073$ , 95% CI $-0.0014$ to $0.18$ ; $p < 0.0001$ ) and BMI ( $\beta = -0.15$ , 95% CI $-0.29$ to $-0.00450$ ; $p = 0.043$ ) in the final GEE model (adjusting for age, sex, adherence, BMI)                                                               | Quality in Prognosis Studies Tool | 1. Study participation: moderate<br>2. Attrition: high<br>3. Prognostic factor: high<br>4. Outcome: low<br>5. Confounding: high<br>6. Statistics: low |

|                |                                                             |             |                                                                                               |                                                                                                                                                                                   |           |                                            |                                                                                                                                                                                                                                                                                                                                                                                                                                                                                                                                                                                                                                                           |                                   |                                                                                                                                                                  |
|----------------|-------------------------------------------------------------|-------------|-----------------------------------------------------------------------------------------------|-----------------------------------------------------------------------------------------------------------------------------------------------------------------------------------|-----------|--------------------------------------------|-----------------------------------------------------------------------------------------------------------------------------------------------------------------------------------------------------------------------------------------------------------------------------------------------------------------------------------------------------------------------------------------------------------------------------------------------------------------------------------------------------------------------------------------------------------------------------------------------------------------------------------------------------------|-----------------------------------|------------------------------------------------------------------------------------------------------------------------------------------------------------------|
|                |                                                             |             | associated with drug levels                                                                   |                                                                                                                                                                                   |           |                                            |                                                                                                                                                                                                                                                                                                                                                                                                                                                                                                                                                                                                                                                           |                                   |                                                                                                                                                                  |
| Jamnitski 2012 | Observational cohort, monocentric, the Netherlands          | RA ETN      | Investigate the relationship between serum etanercept levels and clinical response            | 292 pts, 53 years, 82% female, MTX use 76%, disease duration 8 years, DAS28 5.2                                                                                                   | 6 months  | Drug level and demographic parameters      | Patients with drug levels in the lowest quartile (<2.1mg/l) were more often women 89 vs. 68% (p=0.002) when compared to the highest quartile (>4.7mg/l), used lower dosages of MTX (12.6 vs. 16.9) (p=0.01) had a higher body mass index (27.5 vs. 24.9) (p=0.007); had a higher glomerular filtration rate (130.0±46.6 vs 107.8±29.4, p=0.001)                                                                                                                                                                                                                                                                                                           | Quality in Prognosis Studies Tool | 1.Study participation: high<br>2.Attrition: high<br>3.Prognostic factor: low<br>4.Outcome: low<br>5.Confounding: low<br>6.Statistics: low                        |
| Jani 2015      | Prospective observational cohort (BRAGGSS) multicentric, UK | RA ADA, ETN | Random drug levels, clinical response and adherence to therapy                                | ADA 160 pts, age 56.2 years, 70% female, disease duration 8.6 years, DAS28 5.7, MTX 55%.<br><br>ETN 171 pts, 57 years, 80% female, disease duration 7,8 years, DAS28 5.9, MTX 46% | 12 months | Random drug levels, demographic parameters | In analysis for predictors of low drug levels, for adalimumab, anti-drug antibodies was the strongest predictor (rc 1.27 95%CI 0.44-2.09 p=0.003). Adherence (self-reported) (rc -0.68 95%CI -1.29- -0.07, p=0.028) and BMI (rc 0.055 95%CI 0.017-0.094, p=0.005) were also significant predictors.                                                                                                                                                                                                                                                                                                                                                       | Quality in Prognosis Studies Tool | 1.Study participation: moderate<br>2.Attrition: moderate<br>3.Prognostic factor: moderate<br>4.Outcome: moderate<br>5.Confounding: moderate<br>6.Statistics: low |
| Plasencia 2015 | Retrospective observational cohort, monocentric, Spain      | RA IFX      | The effect of dose increase on trough levels and clinical response in patients with DAS28>3.2 | 42 pts, 88% female, 57 years, disease duration 19 years, treatment duration 6.2 years, MTX 86%, DAS28 4.55                                                                        | 12 months | Infliximab levels, patient characteristics | Patients were divided into three groups based on trough levels: no drug detectable, < 1.1 ug/ml and ≥ 1.1 ug/ml.<br><br>Age of disease onset was lower in patients with no detectable drug levels (49.6 years vs. 61.6 and 67.4 years for low and higher IFX levels, respectively) and duration of treatment was longer for patients with high levels (28.3 years vs. 16.3 and 17.9 years for no and low IFX levels, respectively). (no statistics).<br><br>After dose increase (or shortening of the interval) drug levels in the no (p=1.0) and low (p=0.97) levels group did not increase significantly, as it did in the high levels group (p=0.017). | Quality in Prognosis Studies Tool | 1.Study participation: high<br>2.Attrition: moderate<br>3.Prognostic factor: moderate<br>4.Outcome: low<br>5.Confounding: moderate<br>6.Statistics: moderate     |
| Kneepkens 2015 | Prospective observational cohort, monocentric, the          | AS ETN      | association between drug levels and clinical response                                         | 162 pts, age 43 years, men 71%, disease duration 8 years, HLAB27                                                                                                                  | 24 weeks  | drug levels, BMI, disease activity         | Patients of the highest quartile (>4.6 ug/ml) had a statistically significantly lower BASDAI (5.4 (4-6.6)) and BMI (24.5 (22.4-26.1)) at baseline, compared to patients in the lowest quartile                                                                                                                                                                                                                                                                                                                                                                                                                                                            | Quality in Prognosis Studies Tool | 1.Study participation: moderate<br>2.Attrition: moderate<br>3.Prognostic factor: low<br>4.Outcome: low<br>5.Confounding: low                                     |

|                      |                                               |             |                                                                                                                                                                                                            |                                                               |                                                                                  |                                         |                                                                                                                                                                                                                                                                                                               |                                   |                                                                                                                                                           |
|----------------------|-----------------------------------------------|-------------|------------------------------------------------------------------------------------------------------------------------------------------------------------------------------------------------------------|---------------------------------------------------------------|----------------------------------------------------------------------------------|-----------------------------------------|---------------------------------------------------------------------------------------------------------------------------------------------------------------------------------------------------------------------------------------------------------------------------------------------------------------|-----------------------------------|-----------------------------------------------------------------------------------------------------------------------------------------------------------|
|                      | Netherlands                                   |             |                                                                                                                                                                                                            | 73%, ASDAScrp 3.6, NSAID 70%                                  |                                                                                  |                                         | (<1.8ug/ml): 6.4 (5.6-7.6) and 26.2 (23.6-30). P=0.03 and 0.02, respectively.                                                                                                                                                                                                                                 |                                   | 6.Statistics: low                                                                                                                                         |
| Sigaux 2017          | Observational cohort study, bicentric, France | RA TCZ (iv) | To assess tocilizumab drug levels in RA patients                                                                                                                                                           | 40 pts, age 56 years, female 32/8, disease duration 16 months | 21 pts month 0 to 6, 19 patients during follow-up, mean treatment time 21 months | Serum levels, gender, BMI, MTX          | Gender had no effect on TCZ trough levels (p = 0.54), and trough levels did not differ by BMI category (BMI < 25,25–30, > 30 kg/m <sup>2</sup> , p= 0.84). Patients with and without MTX co-treatment did not differ in serum TCZ trough levels (p= 0.37).                                                    | Quality in Prognosis Studies Tool | 1.Study participation: moderate<br>2.Attrition: high<br>3.Prognostic factor: high<br>4.Outcome: moderate<br>5.Confounding: high<br>6.Statistics: moderate |
| Stamp, 1440 ACR 2019 | Abstract ACR 2019, cross-sectional            | RA ADA      | To determine the influence from variables on adalimumab concentrations and to assess the relationships between adalimumab concentrations, the presence of anti-drug antibodies and disease activity in RA. | 156 pts                                                       | at least 4 months of treatment                                                   | adalimumab concentrations, demographics | Multivariate analysis, which included the presence of ADAb, revealed CRP (p< 0.001), weight (p< 0.004) and ethnicity (p< 0.001) were all independently negatively associated with adalimumab concentrations. There was a negative correlation between IL-6 and adalimumab concentrations (r=-0.038; p< 0.01). | Quality in Prognosis Studies Tool | 1.Study participation: high<br>2.Attrition: high<br>3.Prognostic factor: ?<br>4.Outcome: low<br>5.Confounding: ?<br>6.Statistics: moderate                |

**PTC-4:** There is an association between biopharmaceutical blood concentrations and clinical response, but more data are required to recommend an optimal range for most biopharmaceuticals in most indications.

**Association between biopharmaceutical blood concentrations and clinical response:**

**Rheumatoid arthritis + TNF-inhibitors**

| Study             | Study design                                                               | Population                                                             | Scope/Intervention                                                                                 | Study population                                                                                           | Follow-up | Outcome measures                                                                            | Results                                                                                                                                                                                                                                                                                                                                                                                                                                                                           | Tool used for RoB assessment        | Risk of Bias                                                                                                                                     |
|-------------------|----------------------------------------------------------------------------|------------------------------------------------------------------------|----------------------------------------------------------------------------------------------------|------------------------------------------------------------------------------------------------------------|-----------|---------------------------------------------------------------------------------------------|-----------------------------------------------------------------------------------------------------------------------------------------------------------------------------------------------------------------------------------------------------------------------------------------------------------------------------------------------------------------------------------------------------------------------------------------------------------------------------------|-------------------------------------|--------------------------------------------------------------------------------------------------------------------------------------------------|
| <b>ADALIMUMAB</b> |                                                                            |                                                                        |                                                                                                    |                                                                                                            |           |                                                                                             |                                                                                                                                                                                                                                                                                                                                                                                                                                                                                   |                                     |                                                                                                                                                  |
| Goss 2018         | RCT, CONCERTO trial, multination al, multicenter                           | RA, ADA, 4 different dosages of MTX (2.5, 5, 10 and 20 mg/wk)          | Effect of MTX on adalimumab pharmacokinetics                                                       | 395 patients, 52 years, 75% female                                                                         | 26 weeks  | Response rates (DAS28crp <2.6 and < 3.2) and adalimumab levels                              | Adalimumab range and % DAS28 < 2.6 and < 3.2, respectively: 0-1.845 ug/ml, 24.7 and 40.4%, 1.845-5.83 ug/ml, 34.8 and 49.4%, 5.83-8.935 ug/ml, 48.9 and 65.9% >8.935 ug/ml, 48.3 and 68.5%<br><br>Higher percentages of response up to 8,935 ug/ml, no additional benefit above<br><br>On the basis of logistic regression analyses, the likelihood of a patient achieving DAS28(CRP) <3.2 was statistically significantly related to the concentration of adalimumab (P < 0.001) | Cochrane RoB2 for RCT               | Overall: low<br><br>Randomisation: Low<br>Intervention: low<br>Missing outcome data: low<br>Outcome measurement: low<br>Selective reporting: Low |
| Chen 2016         | Longitudinal observational cohort (dose-halving common practice in Taiwan) | RA ADA with remission (DAS28<2.6) or low disease activity (DAS28 <3.2) | Correlation between ADA levels, and (persistent) clinical response after dose-halving              | 64 pts, 39% remission, 61% LDA.<br><br>86-92% female, disease duration 9 years, DAS28 2.2-3.15, MTX 86-91% | 24 weeks  | Baseline and week 24 drug levels and disease activity: persistent remission or LDA or flare | Persistent remission: 23 pts, persistent LDA: 24 pts, flare: 15 pts (23.5%)<br><br>ADA levels 10.5, 4.5 and 0.9 mg/l at baseline for patients with persistent remission, persistent LDA or flare, respectively (p<0.001)<br><br>ADA levels at week 24 after dose reduction: 5.2, 2.0, 0.1 mg/l for patients with persistent remission, persistent LDA or flare, respectively (p<0.001)                                                                                            | Quality in Prognosis Studies Tool   | 1.Study participation: high<br>2.Attrition: high<br>3.Prognostic factor: low<br>4.Outcome: low<br>5.Confounding: moderate<br>6.Statistics: high  |
| Rosas 2014        | Cross-sectional study, multicentric, Spain                                 | RA, adalimumab                                                         | To assess the usefulness of measuring serum adalimumab levels after at least 3 months of treatment | 57 pts, female 79%, age 63 years, disease duration 14 years, concomitant DMARD 100%, DAS28 2.7, SDAI       | N/A       | DAS28(ESR): remission<2.6, low activity 2.6-3.1, moderate3.2-5.1, severe >5.1               | There was a negative correlation (univariate analysis) between adalimumab levels and DAS28: r=-0.43. Patients with DAS28 ≤3.2 had higher adalimumab levels: 9.3 (4.1) mg/l, vs 4.4 (4.0) mg/l for patients with DAS28>3.2, p<0.001<br><br>When divided into tertiles: <5.5mg/l (mean 2.5 mg/l) corresponded with DAS28 of 3.34 (1.22), 5.5-11.3 mg/l (mean                                                                                                                        | Newcastle-Ottawa for cohort studies | Sum score: **, -, *<br><br>Selection: **<br><br>Comparability: -<br><br>Outcome: *                                                               |

|                      |                                                                           |        |                                                                                                                                                                                                            |                                                                                               |                                |                                                                             |                                                                                                                                                                                                                                                                                                                                                                                                                                                                                                                                                                                                       |                                   |                                                                                                                                                     |
|----------------------|---------------------------------------------------------------------------|--------|------------------------------------------------------------------------------------------------------------------------------------------------------------------------------------------------------------|-----------------------------------------------------------------------------------------------|--------------------------------|-----------------------------------------------------------------------------|-------------------------------------------------------------------------------------------------------------------------------------------------------------------------------------------------------------------------------------------------------------------------------------------------------------------------------------------------------------------------------------------------------------------------------------------------------------------------------------------------------------------------------------------------------------------------------------------------------|-----------------------------------|-----------------------------------------------------------------------------------------------------------------------------------------------------|
|                      |                                                                           |        |                                                                                                                                                                                                            | 6.4, treatment duration 2.7 years                                                             |                                | Drug level                                                                  | 7.9 mg/l) corresponded with DAS28 of 3.04 (1.22) and >11.3 mg/l (mean 13.1 mg/l) corresponded with DAS28 2.23 (0.72).                                                                                                                                                                                                                                                                                                                                                                                                                                                                                 |                                   |                                                                                                                                                     |
| Bartelds 2007        | Prospective observational cohort, monocentric, Amsterdam, the Netherlands | RA ADA | Association antibodies with drug level and clinical response                                                                                                                                               | 121 pts, 79% female, age 53, baseline DAS28 5.3, diseases duration 12 years, MTX use 80%      | 28 weeks                       | Clinical response: EULAR response, drug levels and antibodies               | EULAR non-responders had significantly lower serum adalimumab concentrations than good responders, median 5.4 (0.0 – 21.2) ml/l vs 9.8 (0.0 -33) ml/l (p=0.001)                                                                                                                                                                                                                                                                                                                                                                                                                                       | Quality in Prognosis Studies Tool | 1.Study participation: moderate<br>2.Attrition: moderate<br>3.Prognostic factor: high<br>4.Outcome: low<br>5.Confounding: high<br>6.Statistics: low |
| Stamp, 1440 ACR 2019 | Abstract ACR 2019, cross-sectional                                        | RA ADA | To determine the influence from variables on adalimumab concentrations and to assess the relationships between adalimumab concentrations, the presence of anti-drug antibodies and disease activity in RA. | 156 pts<br><br>No further information available                                               | at least 4 months of treatment | DAS28, DAS28≤3.2, adalimumab concentrations                                 | There was a negative correlation between adalimumab concentration and DAS28 (r=-0.37; p< 0.0001). Adalimumab concentrations were higher in those with DAS28 ≤3.2 compared to those with DAS28 >3.2 (median (IQR) 10.8 (6.4-20.8) mg/l vs.7.1 (1.5-12.6) mg/l; p < 0.001).                                                                                                                                                                                                                                                                                                                             | Quality in Prognosis Studies Tool | 1.Study participation: high<br>2.Attrition: high<br>3.Prognostic factor: ?<br>4.Outcome: low<br>5.Confounding: ?<br>6.Statistics: moderate          |
| <b>ETANERCEPT</b>    |                                                                           |        |                                                                                                                                                                                                            |                                                                                               |                                |                                                                             |                                                                                                                                                                                                                                                                                                                                                                                                                                                                                                                                                                                                       |                                   |                                                                                                                                                     |
| Daien 2012           | Prospective observational cohort, monocentric, France                     | RA ETN | Explore predictive value of etanercept levels for response to treatment                                                                                                                                    | 19 pts, all female, age 56 years, disease duration 5 years, DAS28 4.85, MTX 12 pts, LEF 5 pts | 6 months                       | DAS28, EULAR response, remission (DAS28<2.6) LDA (DAS28 2.6-3.2) drug level | At 3 and 6 months, median concentrations were higher (ns) for responders than for nonresponders. 3.6 vs.2.1 ug/ml at 3 months and 3.6 vs. 2.4 ug/ml at 6 months.<br>ETN concentration at 3 months was inversely correlated with change in DAS28 at 3 months (r-0.50, p=0.03) but not at 6 months (r-0.48, p=0.06).<br>At 3 months the median ETN concentration was significantly lower for 6 month nonresponders than for responders, 1.75 vs. 3.7 ug/ml, p=0.03. The 3 month ETN concentration was significantly correlated with the change in DAS28 between baseline and 6 months (r-0.62, p=0.006) | Quality in Prognosis Studies Tool | 1.Study participation: high<br>2.Attrition: low<br>3.Prognostic factor: low<br>4.Outcome: low<br>5.Confounding: high<br>6.Statistics: low           |

|                   |                                                                       |               |                                                                                    |                                                                                                                          |           |                                                    |                                                                                                                                                                                                                                                                                                                                                                                                                                                                                                                                                                                                                                                                                                        |                                     |                                                                                                                                                                                          |
|-------------------|-----------------------------------------------------------------------|---------------|------------------------------------------------------------------------------------|--------------------------------------------------------------------------------------------------------------------------|-----------|----------------------------------------------------|--------------------------------------------------------------------------------------------------------------------------------------------------------------------------------------------------------------------------------------------------------------------------------------------------------------------------------------------------------------------------------------------------------------------------------------------------------------------------------------------------------------------------------------------------------------------------------------------------------------------------------------------------------------------------------------------------------|-------------------------------------|------------------------------------------------------------------------------------------------------------------------------------------------------------------------------------------|
| Jamnitski 2012    | Longitudinal observational cohort, monocentric, the Netherlands       | RA ETN        | Investigate the relationship between serum etanercept levels and clinical response | 292 pts, 53 years, 82% female, MTX use 76%, disease duration 8 years, DAS28 5.2                                          | 6 months  | Drug level and EULAR response                      | <p>Drug levels were higher for EULAR good responders (n=103 at M6) as compared to moderate (n=115 at M6) and non-responders (n=74 at M6), there were no differences between moderate and non-responders.</p> <p>Levels at 1, 4 and 6 months:<br/>           Good: 3.4 (2.22-4.62), 3.98 (2.72-5.35) and 3.78 (2.53-5.17) (p&lt;0,05 for all vs. moderate and poor response)<br/>           Moderate: 2.52 (1.26-4.11), 3.08 (2.03-4.52) and 3.1 (2.12-4.47) (ns with poor response)<br/>           Non: 2.64 (1.20-3.89), 2.54 (1.12-3.94) and 2.80 (1.27-3.93)</p> <p>There was a significant correlation between the height of the level and EULAR response (OR 2.51 95%CI 1.58-3.98 p&lt;0.001)</p> | Quality in Prognosis Studies Tool   | <p>1.Study participation: high</p> <p>2.Attrition: high</p> <p>3.Prognostic factor: low</p> <p>4.Outcome: low</p> <p>5.Confounding: low</p> <p>6.Statistics: low</p>                     |
| <b>INFLIXIMAB</b> |                                                                       |               |                                                                                    |                                                                                                                          |           |                                                    |                                                                                                                                                                                                                                                                                                                                                                                                                                                                                                                                                                                                                                                                                                        |                                     |                                                                                                                                                                                          |
| Siljehult 2018    | Prospective observational cohort, multicentric, Sweden                | RA infliximab | Correlation between drug levels and clinical response                              | 94 pts, female 83%, age disease onset 42 years, disease duration 14 years, DAS28 5.6, MTX 77%, IFX dose 3.3 (±0.6) mg/kg | 52 weeks  | DAS28, EULAR response, ESR, CRP, infliximab levels | <p>Good responders had significantly higher concentrations of IFX, e.g. at 52 weeks good responders had an IFX concentration of 6.6 ± 1.4 µg/mL, compared with 3.6 ± 1.3 µg/mL in patients with a moderate response and 2.6 ± 1.6 µg/mL in those with a poor response (p &lt; 0.001).</p> <p>Patients with a good response at 14 weeks and an IFX concentration &gt; 0.5 µg/mL were still good to moderate responders after 52 weeks (16/18; 88.9%).</p> <p>The concentration of IFX was inversely correlated with DAS28, and with levels of ESR and CRP at 14 weeks (p &lt; 0.01, p &lt; 0.05, and p &lt; 0.001, respectively) and 52 weeks (p &lt; 0.001 for all three analyses)</p>                 | Quality in Prognosis Studies Tool   | <p>1.Study participation: moderate</p> <p>2.Attrition: high</p> <p>3.Prognostic factor: moderate</p> <p>4.Outcome: moderate</p> <p>5.Confounding: high</p> <p>6.Statistics: moderate</p> |
| Van der Maas 2012 | Cross-sectional with observation period, monocentric, the Netherlands | RA infliximab | To get insight in serum trough levels of infliximab in patient with RA             | 147 pts, age 58 years, female 69%, disease duration 11 years, DMARDs 78%, DAS28 3.5, treatment duration 2.5 years        | 1,5 years | Infliximab level, DAS28                            | <p>4 trough level groups were identified, 0, &lt;1, 1-5 and &gt;5 mg/l. For patients with DAS28&lt;2.6 (n=40), 13 (2-23), 23 (10-35), 48 (32-63) and 18 (6-29)% (95%CI) of patients were in the representative trough level groups, respectively.</p> <p>For patients with DAS28≤ 3.2 (n=65), 13 (4-20), 18 (9-28), 55 (43-67) and 14 (5-22)% (95%CI) of patients were in the representative trough level groups.</p> <p>For patients with DAS28&gt;3.2 (n=82), 29 (19-39), 18 (10-27), 32 (22-42) and 21 (12-30)% (95%CI) of patients were in the representative trough level groups.</p>                                                                                                             | Newcastle-Ottawa for cohort studies | <p>Sum score: **, -, **</p> <p>Selection: **</p> <p>Comparability: -</p> <p>Outcome: **</p>                                                                                              |

|                      |                                                                            |                         |                                                                                                                                             |                                                                                                                                                                                                                                           |           |                                                                                             |                                                                                                                                                                                                                                                                                                                                                                                                               |                                     |                                                                            |
|----------------------|----------------------------------------------------------------------------|-------------------------|---------------------------------------------------------------------------------------------------------------------------------------------|-------------------------------------------------------------------------------------------------------------------------------------------------------------------------------------------------------------------------------------------|-----------|---------------------------------------------------------------------------------------------|---------------------------------------------------------------------------------------------------------------------------------------------------------------------------------------------------------------------------------------------------------------------------------------------------------------------------------------------------------------------------------------------------------------|-------------------------------------|----------------------------------------------------------------------------|
| Pascual-Salcedo 2011 | Longitudinal observational, retrospective cohort study, monocentric, Spain | RA infliximab           | Influence of immunogenicity on long term treatment                                                                                          | 85 pts, age 54 years, female 81%, MTX 81%, mean treatment duration 4.24 years, DAS28 5.49                                                                                                                                                 | > 4 years | Infliximab levels, EULAR response                                                           | Serum trough infliximab levels (Median, IQR) were higher in EULAR responders (good and moderate) than in EULAR non-responder patients at 6 months (992, 46-2960 vs 0, 0-60 ng/ml, P = 0.005), 1 year (1792, 384-3904 vs 0, 0-555 ng/ml, P = 0.021) and >4 years (1536, 220-3456 vs 0, 0-2672 ng/ml, P = 0.101), respectively                                                                                  | Newcastle-Ottawa for cohort studies | Sum score: ***, -, **<br>Selection: ***<br>Comparability: -<br>Outcome: ** |
| Finckh 2010          | Nested case control cohort study, multicentric, Switzerland                | RA IFX                  | Correlation between antibodies and drug levels and acquired drug resistance (defined by increased DAS28 or increased dose of IFX or DMARDs) | 64 pts, 24 acquired drug resistance/ 40 ongoing good response.<br>Age 58/60 years, female 79/74%, disease duration 14 years, MTX 85/79%, treatment duration 3/2.3 years, IFX dose 5,4/4,3mg/kg (p=0,02) ; interval 7,1/8,7 weeks (p=0,01) | N/A       | Drug levels in patients with continuous good clinical response and acquired drug resistance | Median IFX concentration with acquired therapeutic resistance 3 382 ng/L [IQR: 122–26 201] compared to 17 248 ng/L [IQR: 372–28 176] in patients with ongoing good responses, no statistically significant difference.<br><br>Of note: patients with acquired drug resistance had significantly higher dosages of IFX (5.4 mg/kg vs. 4.3, p= 0.02) and shorter infusion intervals (7.1 vs. 8.7 weeks, p=0.01) | Newcastle-Ottawa for cohort studies | Sum score: ***, *, *<br>Selection: ***<br>Comparability: *<br>Outcome: *   |
| Mulleman 2010        | Cross-sectional cohort, followed up for 42 weeks, monocentric, France      | RA IFX                  | Predictive value of trough levels for sustainable clinical response                                                                         | 28 pts, 20 female, age 59 years, treatment duration 45 months, IFX dose: 4.1 (2.7-5.9) mg/kg / 8.1 (5.0-12.4) weeks, DAS28 3.0 (0.8-7.6)                                                                                                  | 42 weeks  | Infliximab concentration, DAS28 ≤ or > 3.2, treatment maintenance                           | Patients with low disease activity (DAS28<3.2) had higher median drug level values (3.26 mg/l) than those with persistent disease (0.16 mg/l), (p<0.01).<br>Patients with high baseline infliximab exposure, above the median of 2.27 mg/l, had better treatment maintenance (p<0.01).                                                                                                                        | Newcastle-Ottawa for cohort studies | Sum score: **, -, *<br>Selection: **<br>Comparability: -<br>Outcome: *     |
| Takeuchi 2009        | Randomized controlled                                                      | RA infliximab (week 0 - | Impact of trough level on radiographic and                                                                                                  | 334 pts, age 49-50, disease duration 7-8                                                                                                                                                                                                  | 54 weeks  | Trough level, EULAR response, TSS (total sharp                                              | A significant association was observed between clinical response and trough serum infliximab levels at week 54. Better EULAR response was obtained in patients with higher                                                                                                                                                                                                                                    | Cochrane RoB2 for RCT               | Overall: low<br>Randomisation: Low<br>Intervention: low                    |

|                                                                           |                                                                            |                                            |                                                                                                 |                                                                                     |          |                                                      |                                                                                                                                                                                                                                                                                                                                                                                                                                                                                                                                                                                                                                                                                                                                                                                             |                                   |                                                                                                                                                                  |
|---------------------------------------------------------------------------|----------------------------------------------------------------------------|--------------------------------------------|-------------------------------------------------------------------------------------------------|-------------------------------------------------------------------------------------|----------|------------------------------------------------------|---------------------------------------------------------------------------------------------------------------------------------------------------------------------------------------------------------------------------------------------------------------------------------------------------------------------------------------------------------------------------------------------------------------------------------------------------------------------------------------------------------------------------------------------------------------------------------------------------------------------------------------------------------------------------------------------------------------------------------------------------------------------------------------------|-----------------------------------|------------------------------------------------------------------------------------------------------------------------------------------------------------------|
|                                                                           | trial, RISING multicentric, Japan                                          | 14: 3 mg/kg, week 14-46: 3, 6 or 10 mg/kg) | clinical response to IFX + MTX                                                                  | years, DAS28 6.2, Sharp score (median) 28-38                                        |          | score) change, DAS28 remission                       | trough serum infliximab levels (p<0.0001). no: <0.1 ug/ml, moderate: 11 ug/ml and good 3.0 ug/ml. Furthermore, patients achieving remission also had significantly higher trough serum levels than patients without remission (p<0.0001). remission: 3.1 ug/ml, no remission 1.0 ug/ml.<br><br>Significant differences were observed among trough serum infliximab levels at week 54 in patients classified as progressed (0.5 ug/ml), no change (2.0 ug/ml) or improved (3.8 ug/ml) in joint damage (p = 0.0022). Progression of joint damage was most frequently observed in patients with <0.1 ug/ml trough serum level, and none of these patients showed improvement. In contrast, there was no case with progression of joint damage in patients with >10.0 ug/ml trough serum level. |                                   | Missing outcome data: low<br>Outcome measurement: low<br>Selective reporting: Low                                                                                |
| Wolbink 2005                                                              | Prospective observational cohort, monocentric, the Netherlands             | RA infliximab                              | Relationship between serum trough infliximab, clinical response and CRP                         | 105 pts, female 83%, age 56 years, disease duration 12 years, MTX 86/105, DAS28 6.1 | 14 weeks | EULAR response, drug level                           | After 14 weeks of treatment responders had significantly (p<0.01) higher median serum trough infliximab concentrations than non-responders (3.6 (1.4–8.2 ) v 0.5 (0.2–2.2) mg/l.<br><br>% EULAR responders per IFX concentration group at week 14: 0-1.2 mg/l: 50%; 1.3-4.7 mg/l: 90%; 5-25.8 mg/l: 88%                                                                                                                                                                                                                                                                                                                                                                                                                                                                                     | Quality in Prognosis Studies Tool | 1.Study participation: low<br>2.Attrition: high<br>3.Prognostic factor: moderate<br>4.Outcome: low<br>5.Confounding: moderate<br>6.Statistics: low               |
| <b>GOLIMUMAB</b>                                                          |                                                                            |                                            |                                                                                                 |                                                                                     |          |                                                      |                                                                                                                                                                                                                                                                                                                                                                                                                                                                                                                                                                                                                                                                                                                                                                                             |                                   |                                                                                                                                                                  |
| Kneepkens 2014                                                            | Longitudinal observational cohort, multicentric, the Netherlands and Spain | RA GLM                                     | Association between drug level and clinical response                                            | 37 pts, 52 years, 84% female, disease duration 12 years, DAS28 4.4 MTX 65%          | 1 year   | Clinical response (DAS28 < or ≥ 3,2) and drug levels | Golimumab levels were higher for 52 week responders (DAS28<3.2) (1.36 (0.5-1.82) ug/ml), compared with nonresponders (DAS28≥3.2) (0.43 (0.23-0.84) ug/ml) (p=0,023)<br><br>The lowest golimumab level quartile (<0.25 ug/ml) comprised 32% of all nonresponding patients, while the highest quartile (>1.4ug/ml) comprised 47% of all responding patients.                                                                                                                                                                                                                                                                                                                                                                                                                                  | Quality in Prognosis Studies Tool | 1.Study participation: moderate<br>2.Attrition: moderate<br>3.Prognostic factor: moderate<br>4.Outcome: moderate<br>5.Confounding: moderate<br>6.Statistics: low |
| <b>COMBINATION OF TNF INHIBITORS (adalimumab, etanercept, infliximab)</b> |                                                                            |                                            |                                                                                                 |                                                                                     |          |                                                      |                                                                                                                                                                                                                                                                                                                                                                                                                                                                                                                                                                                                                                                                                                                                                                                             |                                   |                                                                                                                                                                  |
| Moots 2017                                                                | Cross-sectional study, multinational                                       | RA adalimumab, etanercept                  | Relationship of anti-drug antibodies and efficacy and patient reported outcome with drug levels | ETN n=200, age 57 years, female 78%, treatment duration 14.6                        | N/A      | CDAI, SDAI, DAS28 ESR/CRP, TJC, HAQ, SF-36, EQ-5D    | In patients treated with etanercept, there were no significant correlations between drug trough level and efficacy endpoints or inflammation markers.<br><br>In patients treated with adalimumab, there were negative correlations between serum trough level and DAS28(ESR) (r=-0.172, p=0.0155), DAS28(CRP) (r=-0.154, p=0.0297), TJC (r=-                                                                                                                                                                                                                                                                                                                                                                                                                                                | Quality in Prognosis Studies Tool | 1.Study participation: moderate<br>2.Attrition: high<br>3.Prognostic factor: ?<br>4.Outcome: moderate<br>5.Confounding: high<br>6.Statistics: low                |

|             |                                                                                                                                                                                                                         |                   |                                                                                                                                                          |                                                                                                                                                                                                                      |           |                                                                                                  |                                                                                                                                                                                                                                                                                                                                                                                                                                                                                                                                                                                                                                                                                                                                                                                                                                                                               |                                   |                                                                                                                                                         |
|-------------|-------------------------------------------------------------------------------------------------------------------------------------------------------------------------------------------------------------------------|-------------------|----------------------------------------------------------------------------------------------------------------------------------------------------------|----------------------------------------------------------------------------------------------------------------------------------------------------------------------------------------------------------------------|-----------|--------------------------------------------------------------------------------------------------|-------------------------------------------------------------------------------------------------------------------------------------------------------------------------------------------------------------------------------------------------------------------------------------------------------------------------------------------------------------------------------------------------------------------------------------------------------------------------------------------------------------------------------------------------------------------------------------------------------------------------------------------------------------------------------------------------------------------------------------------------------------------------------------------------------------------------------------------------------------------------------|-----------------------------------|---------------------------------------------------------------------------------------------------------------------------------------------------------|
|             |                                                                                                                                                                                                                         | and<br>infliximab |                                                                                                                                                          | months, MTX<br>61.5%<br><br>ADA n=199, age<br>54 years, female<br>81%, treatment<br>duration 13.5<br>months, MTX 70%<br><br>IFX n=196, age 61<br>years, female<br>80%, treatment<br>duration 13.1<br>months, MTX 64% |           |                                                                                                  | 0.167, p=0.0187), ESR (r=-0.290, p<0.0001) and CRP (r=-0.440, p<0.0001).<br>In patients treated with infliximab, negative correlations were observed between serum levels and ESR (r=-0.261, p=0.0003) and CRP (r=-0.399, p<0.0001)<br><br>In patients treated with etanercept or infliximab, no statistically significant correlations were observed between drug levels and patient-reported outcomes.<br>In patients with adalimumab, a negative correlation was observed between levels and HAQ-DI (r=-0.225, p=0.0014). Positive correlations were found with: EQ-5D utility score (r = 0.177, p = 0.0126), EQ-5D visual analog scale (VAS) score (r = 0.224, p=0.0014), SF-36 mental component score (r = 0.141, p= 0.0475), SF-36 Role Physical (r = 0.154, p = 0.0297), SF-36 General Health (r = 0.200, p = 0.0047), and SF-36 Role Emotional (r = 0.160, p= 0.0238) |                                   |                                                                                                                                                         |
| Bouman 2017 | Combined data: Patients from the intervention arm of an open RCT investigating non-inferiority of a dose reduction strategy (ADA / ETN) and patients from a longitudinal observational down titration study of IFX, the | ADA ETN<br>IFX RA | Association between drug level and successful dose reduction (increase interval for ADA and ETN, dose reduction for IFX) and discontinuation of the drug | ADA 42 pts ETN<br>76 pts IFX 51 pts.<br>Age 58-61 years, 57-64% female, disease duration 7.5 – 13 years, DAS28 2.4-2.6, duration current treatment: 2.9-5.6 years, MTX 45-68%                                        | 18 months | Predictive value of random drug levels for successful dose reduction and discontinuation of TNFi | Mean drug levels were not significantly different between patients continuing without dose reduction, with dose reduction or discontinuing treatment<br><br>ADA: 6.8, 8.1 and 8.5 ug/ml, resp.<br><br>ETN: 2.4, 2.0 and 2.7 ug/ml, resp.<br><br>IFX: 0.55, 1.7 and 1.0 ug/ml, resp.<br><br>Using ROC analysis, no significant predictive value of serum levels for successful dose reduction or discontinuation could be provided, except for a significant but small inverse association between lower etanercept levels and higher chance for successful dose reduction (AUC 0.36, optimal cut off <2.6 ug/ml)<br><br>For ADA, high trough levels were associated with successful dose reduction (AUC 0.86) with trough levels > 7.8 ug/ml showing a sensitivity of 100% and a specificity of 86%                                                                           | Quality in Prognosis Studies Tool | 1.Study participation: moderate<br>2.Attrition: moderate<br>3.Prognostic factor: moderate<br>4.Outcome: low<br>5.Confounding: high<br>6.Statistics: low |

|               |                                                             |                           |                                                                                                      |                                                                                                                                                                   |           |                                                                                |                                                                                                                                                                                                                                                                                                                                                                                                                                                                                                                                                                                                                                                                                                                                                   |                                     |                                                                                                                                                                                             |
|---------------|-------------------------------------------------------------|---------------------------|------------------------------------------------------------------------------------------------------|-------------------------------------------------------------------------------------------------------------------------------------------------------------------|-----------|--------------------------------------------------------------------------------|---------------------------------------------------------------------------------------------------------------------------------------------------------------------------------------------------------------------------------------------------------------------------------------------------------------------------------------------------------------------------------------------------------------------------------------------------------------------------------------------------------------------------------------------------------------------------------------------------------------------------------------------------------------------------------------------------------------------------------------------------|-------------------------------------|---------------------------------------------------------------------------------------------------------------------------------------------------------------------------------------------|
|               | Netherlands                                                 |                           |                                                                                                      |                                                                                                                                                                   |           |                                                                                |                                                                                                                                                                                                                                                                                                                                                                                                                                                                                                                                                                                                                                                                                                                                                   |                                     |                                                                                                                                                                                             |
| Chen 2015     | Longitudinal observational cohort, Taiwan                   | RA ADA and ETN            | Association between drug levels and therapeutic response                                             | ADA 36 pts, 53 years, 89% female, disease duration 5.4 years, DAS28 6.1, MTX 89% ETN 34 pts, 58 years, 88% female, disease duration 5.4 years, DAS28 5.95 MTX 88% | 12 months | EULAR response and drug level                                                  | <p>There was a significantly higher ADA level in EULAR responders at 6 and 12 months compared to both moderate and poor responders.</p> <p>at 6 months: 6.5, 1.0 and 0.4 mg/l, resp. (<math>p&lt;0.001</math> for both)</p> <p>at 12 months: 5.9, 0.5 and 0.3 mg/l, resp. (<math>p&lt;0.01</math> for both)</p> <p>For ETN 6 month good responders had higher drug levels than moderate responders and nonresponders.</p> <p>12 month good responders had higher drug levels than moderate and non-responders.</p> <p>at 6 months: 2.3, 1.0, 0.2 mg/l, resp. (<math>p&lt;0.05</math> (vs. moderate) ; <math>p&lt;0.001</math> (vs. poor))</p> <p>at 12 months: 1.3, 0.5, 0.1 mg/l, resp. ns (vs moderate) ; <math>p&lt;0.01</math> (vs poor))</p> | Quality in Prognosis Studies Tool   | <p>1.Study participation: high</p> <p>2.Attrition: ?</p> <p>3.Prognostic factor: moderate</p> <p>4.Outcome: low</p> <p>5.Confounding: high</p> <p>6.Statistics: moderate</p>                |
| Sanmarti 2015 | Cross-sectional study                                       | RA etanercept, adalimumab | Confirmation of the study results by Chen et al 2015, optimal cut-offs for adalimumab and etanercept | 127 patients in total, 54 adalimumab, 73 etanercept. 82% female, age 61 years, disease duration 13 years, treatment duration 60 months                            | N/A       | DAS28 $\leq$ 2.6, etanercept and adalimumab trough level cut-offs              | Serum levels of adalimumab and etanercept were significantly higher in patients in remission (DAS28 $\leq$ 2.6) than in those who were not (median (P25–P75) adalimumab 6.9 $\mu$ g/mL (2.7–12) vs 0.5 (0.1–1), $p<0.001$ , etanercept 2.3 $\mu$ g/mL (1.5–3.1) vs 0.8 (0.4–1.8), $p<0.001$ )                                                                                                                                                                                                                                                                                                                                                                                                                                                     | Newcastle-Ottawa for cohort studies | <p>Sum score: ***, -, **</p> <p>Selection: ***</p> <p>Comparability: -</p> <p>Outcome: **</p>                                                                                               |
| Jani 2015     | Prospective observational cohort (BRAGGSS), multicenter, UK | RA ADA, ETN               | Random drug levels, clinical response and adherence to therapy                                       | <p>ADA 160 pts, age 56.2 years, 70% female, disease duration 8.6 years, DAS28 5.7, MTX 55%.</p> <p>ETN 171 pts, 57 years, 80% female, disease duration 7,8</p>    | 12 months | Random drug levels, EULAR response, change in DAS28crp, adherence to treatment | <p>In a multivariable GEE model, after adjusting for confounders BMI, disease duration, age, sex and adherence, there was a relationship between adalimumab level and change in DAS-28 (regression coefficient (rc) 0.060 95% CI 0.015, 0.10, <math>p=0.009</math>), also in a subgroup analysis in MTX treated patients (adjusted for dose) (rc 0.076 95%CI 0.028, 0.12 <math>p=0.002</math>)</p> <p>Drug levels <math>&lt; 1.0</math> ug/ml was associated with no response (rc 2.29 95% CI 1.13-3.44 <math>p&lt;0.0001</math>)</p>                                                                                                                                                                                                             | Quality in Prognosis Studies Tool   | <p>1.Study participation: moderate</p> <p>2.Attrition: moderate</p> <p>3.Prognostic factor: moderate</p> <p>4.Outcome: moderate</p> <p>5.Confounding: moderate</p> <p>6.Statistics: low</p> |

|               |                                                                      |            |                                                                                |                                                                                                                         |          |                                                         |                                                                                                                                                                                                                                                                                                                                                                                                                                                                                                                    |                                     |                                                                            |
|---------------|----------------------------------------------------------------------|------------|--------------------------------------------------------------------------------|-------------------------------------------------------------------------------------------------------------------------|----------|---------------------------------------------------------|--------------------------------------------------------------------------------------------------------------------------------------------------------------------------------------------------------------------------------------------------------------------------------------------------------------------------------------------------------------------------------------------------------------------------------------------------------------------------------------------------------------------|-------------------------------------|----------------------------------------------------------------------------|
|               |                                                                      |            |                                                                                | years, DAS28 5.9, MTX 46%                                                                                               |          |                                                         | Etanercept non trough levels (cut off <3.23ug/mL) at 3 months had a poor value for prediction EULAR no response at 12 months (AUC 0.58 95%CI 0.46-0.70)                                                                                                                                                                                                                                                                                                                                                            |                                     |                                                                            |
| Radstake 2009 | Prospective observational cohort study, monocentric, the Netherlands | RA ADA IFX | Exploring clinical response, antibody formation and drug levels of ADA and IFX | IFX: 35 pts, age 57 years, 86% female, MTX 100%, DAS28 5.6<br>ADA: 34 pts, age 56 years, 79% female, MTX 41%, DAS28 5.7 | 6 months | ADA and IFX levels at 3 and 6 months and EULAR response | IFX: correlation between drug level and good response was $r=0.54$ , $p=0.03$<br>serum infliximab levels for good, moderate and non-responders at 3 and 6 months, respectively: 3.1 (0.8-17), 1.9 (0-5), 0.2 (0-14) and 2.7 (0.9-10), 0.8 (0-9), 0 (0-0)<br><br>ADA: correlation between drug level and good response was $r=0.64$ , $p=0.01$<br>serum adalimumab levels for good, moderate and non-responders at 3 and 6 months, respectively: 31 (3-151), 12 (1-138), 2 (0-7) and 32 (3-150), 14 (2-41), 1 (0-0) | Newcastle-Ottawa for cohort studies | Sum score: ***, -, **<br>Selection: ***<br>Comparability: -<br>Outcome: ** |

**Rheumatoid arthritis + other biologics**

| Study              | Study design                                                                         | Population                      | Scope/Intervention                                                                 | Study population                                                      | Follow-up                                          | Outcome measures                         | Results                                                                                                                                                                                                                                                                                                                                                                                                                                      | Tool used for RoB assessment      | Risk of Bias                                                                                                                                              |
|--------------------|--------------------------------------------------------------------------------------|---------------------------------|------------------------------------------------------------------------------------|-----------------------------------------------------------------------|----------------------------------------------------|------------------------------------------|----------------------------------------------------------------------------------------------------------------------------------------------------------------------------------------------------------------------------------------------------------------------------------------------------------------------------------------------------------------------------------------------------------------------------------------------|-----------------------------------|-----------------------------------------------------------------------------------------------------------------------------------------------------------|
| <b>TOCILIZUMAB</b> |                                                                                      |                                 |                                                                                    |                                                                       |                                                    |                                          |                                                                                                                                                                                                                                                                                                                                                                                                                                              |                                   |                                                                                                                                                           |
| Arad 2019          | Israeli cohort of the TOZURA study (multinational, stage IV, single arm, open label) | RA tocilizumab 162 mg sc weekly | To determine whether trough levels are associated with disease activity / response | 100 pts, 54 years, 80% female, DAS28 5.0, CDAI 31.9                   | 24 weeks                                           | CDAI, Trough level                       | At week 12, in multivariate analysis, for every increase of 10 µg/ml in the serum concentration of TCZ there was a corresponding improvement of 2.22 units in the CDAI score ( $p = 0.002$ ).<br>In a multivariate binary GEE model, every increase of 10 µg/ml in the serum concentration of TCZ was associated with an OR of 1.41 of being in a state of CDAI remission or LDA versus moderate/high disease activity state ( $p = 0.001$ ) | Quality in Prognosis Studies Tool | 1.Study participation: low<br>2.Attrition: high<br>3.Prognostic factor: high<br>4.Outcome: Low<br>5.Confounding: moderate<br>6.Statistics: moderate       |
| Sigaux 2017        | Longitudinal observational cohort study,                                             | RA TCZ (iv)                     | To assess tocilizumab drug levels in RA patients                                   | 40 pts, age 56 years, female 32/8, disease duration 16 months, 24 pts | 21 pts month 0 to 6, 19 patients during follow-up, | Serum levels, delta DAS28crp 0-3 months, | No significant correlation was found between TCZ level and change in DAS28-CRP within the first 3 months ( $p= 0.29$ )                                                                                                                                                                                                                                                                                                                       | Quality in Prognosis Studies Tool | 1.Study participation: moderate<br>2.Attrition: high<br>3.Prognostic factor: high<br>4.Outcome: moderate<br>5.Confounding: high<br>6.Statistics: moderate |

|                  |                                                                                   |                    |                                                      |                                                                                                                               |                               |                                                                                                                            |                                                                                                                                                                                                                                                                                                                                                         |                                     |                                                                              |
|------------------|-----------------------------------------------------------------------------------|--------------------|------------------------------------------------------|-------------------------------------------------------------------------------------------------------------------------------|-------------------------------|----------------------------------------------------------------------------------------------------------------------------|---------------------------------------------------------------------------------------------------------------------------------------------------------------------------------------------------------------------------------------------------------------------------------------------------------------------------------------------------------|-------------------------------------|------------------------------------------------------------------------------|
|                  | bicentric, France                                                                 |                    |                                                      | with DMARD therapy                                                                                                            | mean treatment time 21 months |                                                                                                                            |                                                                                                                                                                                                                                                                                                                                                         |                                     |                                                                              |
| Benucci 2016     | Retrospective longitudinal observational cohort, Italy                            | RA TCZ             | Association between drug level and disease activity  | 126 pts (110 female), 59 years, disease duration 11 years, 107 pts + MTX, 6 pts + LEF, 13 pts TCZ mono. All used prednisolone | 6 months                      | Trough level and disease activity (DAS28, CRP, ESR)                                                                        | Patients with TCZ trough levels below 10 ug/ml (n=84), as compared to patients with TCZ levels >10 ug/ml, had after 6 months of treatment a higher DAS-28 (3.09 vs. 2.78, p=0.0005), ESR (27 vs. 14, p=0.0001) and CRP (1.47 vs. 0.65 mg/dl, p=0.0086).<br><br>There were no statistically significant differences at baseline between these parameters | Newcastle-Ottawa for cohort studies | Sum score: ***, -, ***<br>Selection: ***<br>Comparability: -<br>Outcome: *** |
| <b>RITUXIMAB</b> |                                                                                   |                    |                                                      |                                                                                                                               |                               |                                                                                                                            |                                                                                                                                                                                                                                                                                                                                                         |                                     |                                                                              |
| Boumans 2013     | Combined data of 3 monocentric prospective observational cohorts, the Netherlands | RA RTX (2x 1000mg) | Association between drug level and structural damage | 62 pts, 69-75% female, age 51-58 years, DAS28 6.0-6.6, disease duration 12-14 years, MTX 46-100%                              | 1 year                        | Drug levels at 4, 12-16 and 24 weeks of treatment and radiographic progression between baseline and 1 year after treatment | There were no differences in drug level between radiological progressors (increase Sharp van der Heijde Score $\geq$ 3) and non-progressors: 126 vs 128 ug/ml (p=0.74) and 6.0 vs. 8.2 ug/ml (p=0.68), at week 4 and 12-16, respectively                                                                                                                | Newcastle-Ottawa for cohort studies | Sum score: **, -, *<br>Selection: **<br>Comparability: -<br>Outcome: *       |

**Axial spondyloarthritis + TNF inhibitors**

| Study             | Study design                               | Population        | Scope/Intervention                                                                | Study population                                                                                            | Follow-up       | Outcome measures                  | Results                                                                                                                                                                                                                                                                                                                                | Tool used for risk of bias assessment | Risk of bias                                                                                                                                                 |
|-------------------|--------------------------------------------|-------------------|-----------------------------------------------------------------------------------|-------------------------------------------------------------------------------------------------------------|-----------------|-----------------------------------|----------------------------------------------------------------------------------------------------------------------------------------------------------------------------------------------------------------------------------------------------------------------------------------------------------------------------------------|---------------------------------------|--------------------------------------------------------------------------------------------------------------------------------------------------------------|
| <b>ADALIMUMAB</b> |                                            |                   |                                                                                   |                                                                                                             |                 |                                   |                                                                                                                                                                                                                                                                                                                                        |                                       |                                                                                                                                                              |
| Ducourau 2020     | Prospective, randomised, open label multi- | AxSpA, adalimumab | to evaluate the ability of methotrexate (MTX) to decrease adalimumab immunisation | MTX+ 52 pts, MTX- 55pts, male 42-51%, HLAB27 58-60%, age 43-41 years, disease duration 3-2 years, ASDAS 3.0 | Median 88 weeks | Drug concentration, drug survival | Maintenance of adalimumab in patients within the first quartile of adalimumab concentrations (<4 ug/mL) at W8 was poorer than in others (median survival of 68.6 weeks vs 92.7 weeks, respectively, p=0.09). Adalimumab concentrations measured at W12 and 26 were not statistically associated with adalimumab long-term maintenance. | Cochrane RoB2 for RCT                 | Overall: high<br><br>Randomisation: Low<br>Intervention: some concerns<br>Missing outcome data: low<br>Outcome measurement: high<br>Selective reporting: Low |

|                    |                                                                            |               |                                                                                                                                                                 |                                                                                                                                                               |          |                                                                   |                                                                                                                                                                                                                                                                                                                                                                                                                                  |                                     |                                                                                                                                                                  |
|--------------------|----------------------------------------------------------------------------|---------------|-----------------------------------------------------------------------------------------------------------------------------------------------------------------|---------------------------------------------------------------------------------------------------------------------------------------------------------------|----------|-------------------------------------------------------------------|----------------------------------------------------------------------------------------------------------------------------------------------------------------------------------------------------------------------------------------------------------------------------------------------------------------------------------------------------------------------------------------------------------------------------------|-------------------------------------|------------------------------------------------------------------------------------------------------------------------------------------------------------------|
|                    | center study<br>(2013-2014)                                                |               |                                                                                                                                                                 | - 3.2, CRP (mg/L)<br>2.5 - 4                                                                                                                                  |          |                                                                   |                                                                                                                                                                                                                                                                                                                                                                                                                                  |                                     |                                                                                                                                                                  |
| Ding 2020          | Observational cohort study, monocentric, China                             | AS adalimumab | To determine a concentration-effect curve for adalimumab in patients with AS                                                                                    | 31 pts, age 31 yrs, male 94%, disease duration 7 yrs, CRP 16 mg/l, ASDAScrp 4.06, BASDAI 6.1, NSAIDs 15%                                                      | 12 weeks | ADA concentrations, ASDAS                                         | Week 12 adalimumab levels were significantly associated with primary response at 12 weeks of treatment (median 4.28, IQR 0.34-9.24 vs. 13.26 µg/mL, IQR 10.15-16.63 µg/mL among primary nonresponders vs. primary responders, p=0.0008)<br>response was defined as either a decrease in ASDAS from baseline ( $\Delta$ ASDAS) $\geq$ 2.0 or a moderate disease activity achievement (ASDAS < 2.1) with $\Delta$ ASDAS $\geq$ 1.1 | Quality in Prognosis Studies Tool   | 1.Study participation: moderate<br>2.Attrition: high<br>3.Prognostic factor: ?<br>4.Outcome: low<br>5.Confounding: high<br>6.Statistics: low                     |
| Senabre 2019       | Cross-sectional, monocentric, Spain                                        | AS adalimumab | To assess the prevalence of anti-drug antibodies in patients with axSpA, to investigate their relationship with serum levels of adalimumab and disease activity | 51 pts, 535 male, age 47 years, disease duration 71 months, DMARDs 21.6%, HLAB27 82%, BASDAI 4.2, ASDAScrp 2.0, ASDASesr 2.3, adalimumab treatment 9.8 months | N/A      | BASDAI, ASDAS (CRP/ESR), trough levels                            | Patients classified as inactive disease/low activity (ASDAS-CRP < 2.1, ASDAS-ESR < 2.1 and BASDAI < 4) had higher median adalimumab levels (mg/l) compared to those with moderate/high activity: 9.3 vs 0.3, 9.9 vs 3.0 and 9.5 vs 2.6, respectively. (p<0.001 for ASDAS-CRP & ESR ; p<0.01 for BASDAI)                                                                                                                          | Newcastle-Ottawa for cohort studies | Sum score: **, **, *<br>Selection: **<br>Comparability: **<br>Outcome: *                                                                                         |
| Kneepkens 2015 (2) | Prospective observational cohort, multicentric, the Netherlands and Taiwan | AS ADA        | Association between drug level and clinical response                                                                                                            | 115 pts, 42 years, 68% male, disease duration 8 years, HLAB27 83%, ASDAS 3.5, BASDAI 6.4, NSAIDs 65%                                                          | 24 weeks | BASDAI, BASDAI50 response, ASDAScrp, ESR, drug levels, antibodies | There was no statistically significant difference in adalimumab levels between BASDAI50 responders and nonresponders: 12.0 (3.2-16) vs. 7.4 (4.1-15.5), p=0.3.<br><br>GEE analysis showed a significant association between adalimumab level and disease activity, both ASDAS (p=0.02) and BASDAI (p=0.02), and ESR (p<0.001)                                                                                                    | Quality in Prognosis Studies Tool   | 1.Study participation: moderate<br>2.Attrition: moderate<br>3.Prognostic factor: moderate<br>4.Outcome: moderate<br>5.Confounding: moderate<br>6.Statistics: low |
| <b>ETANERCEPT</b>  |                                                                            |               |                                                                                                                                                                 |                                                                                                                                                               |          |                                                                   |                                                                                                                                                                                                                                                                                                                                                                                                                                  |                                     |                                                                                                                                                                  |
| Dong 2019          | Prospective observational cohort, monocentric, China                       | AS etanercept | To investigate the effective serum level of etanercept in patients with AS                                                                                      | 60 pts, 54/60 male, age 29 years, disease duration 4 years                                                                                                    | 24 weeks | BASDAI, ASDAS CRP/ESR, drug levels                                | Levels were significantly higher in patients with ASDAS-CRP < 2.1 ( $2.56 \pm 1.31$ , $2.43 \pm 1.17$ , and $2.64 \pm 1.22$ µg/mL at week 4, 12, 24, respectively) than in patients with ASDAS-CRP $\geq$ 2.1 ( $1.51 \pm 0.63$ , $1.61 \pm 0.26$ , and $1.66 \pm 1.05$ µg/mL at weeks 4,                                                                                                                                        | Quality in Prognosis Studies Tool   | 1.Study participation: moderate<br>2.Attrition: high<br>3.Prognostic factor: moderate<br>4.Outcome: low                                                          |

|                   |                                                                                                     |                           |                                                       |                                                                                                                             |          |                                      |                                                                                                                                                                                                                                                                                                                                                                                                                                                                                                                                             |                                     |                                                                                                                                                                        |
|-------------------|-----------------------------------------------------------------------------------------------------|---------------------------|-------------------------------------------------------|-----------------------------------------------------------------------------------------------------------------------------|----------|--------------------------------------|---------------------------------------------------------------------------------------------------------------------------------------------------------------------------------------------------------------------------------------------------------------------------------------------------------------------------------------------------------------------------------------------------------------------------------------------------------------------------------------------------------------------------------------------|-------------------------------------|------------------------------------------------------------------------------------------------------------------------------------------------------------------------|
|                   |                                                                                                     |                           |                                                       |                                                                                                                             |          |                                      | 12, and 24, respectively. p-values 0.002, <0.001 and 0.032 at week 4, 12 and 24, respectively.                                                                                                                                                                                                                                                                                                                                                                                                                                              |                                     | 5.Confounding: high<br>6.Statistics: moderate                                                                                                                          |
| Kneepkens 2015    | Prospective observational cohort, monocentric, the Netherlands                                      | AS ETN                    | association between drug levels and clinical response | 162 pts, age 43 years, men 71%, disease duration 8 years, HLAB27 73%, ASDAScrp 3.6, NSAID 70%                               | 24 weeks | ASDASCRP, BASDAI, drug levels        | Etanercept levels were significantly higher for patients with ASDAS<2.1 than for patients with ASDAS>2.1: 3.8 (2.5-5.2) vs.2.3 (1.2-3.4) (p<0.001)<br><br>In the lowest quartile of etanercept levels, (<1.80) comprised 35% of patients with ASDAS >2.1, the highest quartile (> 4.6) comprised only 14%.<br><br>The highest quartile comprised 36% of all patients with ASDAS<2.1, this was statistically significant to the number of patients with ASDAS<2.1 in the lowest quartile (15%, p=0.001)                                      | Quality in Prognosis Studies Tool   | 1.Study participation: moderate<br>2.Attrition: moderate<br>3.Prognostic factor: moderate<br>4.Outcome: moderate<br>5.Confounding: moderate<br>6.Statistics: low       |
| de Vries 2009     | Prospective observational cohort, monocentric, the Netherlands                                      | AS ETN                    | Correlation between ETN level and clinical response   | 53 pts, 76% male, age 41 years, HLAB27 88%, BASDAI 6.4, ESR 22 CRP 17                                                       | 6 months | BASDAI 50 response, drug level       | 48 and 41 samples were available at 3 and 6 months, respectively. Mean etanercept level for BASDAI responders at 3 months was 2.7 ug/ml, for non-responders the level was 2.8. there was no statistical difference between these levels.                                                                                                                                                                                                                                                                                                    | Newcastle-Ottawa for cohort studies | Sum score: ***, -, ***<br><br>Selection: ***<br><br>Comparability: -<br><br>Outcome: ***                                                                               |
| <b>INFLIXIMAB</b> |                                                                                                     |                           |                                                       |                                                                                                                             |          |                                      |                                                                                                                                                                                                                                                                                                                                                                                                                                                                                                                                             |                                     |                                                                                                                                                                        |
| Krzysiek 2009     | Randomized study, infliximab maintenance vs, on demand after induction period, multicentric, France | AS IFX, maintenance group | Association between drug level and clinical response  | 93 pts in continuous group with sufficient data for analysis. 74% male, age 40 years, disease duration 12 years, BASDAI 6.1 | 1 year   | ASAS20 response, drug level          | Treatment failure was not associated with low infliximab concentrations either during induction or after 1 year of treatment.<br>39% of 28 nonresponding patients had an infliximab concentration >10ug/ml at week 52.<br>14% of 65 responding patients had an concentration <1ug/ml.<br><br>Median concentrations for responders (n=65) at week 6, 10, 16, 46 and 52: 24.5, 17.8, 10.1, 7.7, 7.1 ug/ml, resp.<br><br>Median concentrations for nonresponders (n=28) at week 6, 10, 16, 46 and 52: 32.5, 22.4, 16.0, 8.6, 10.1 ug/ml, resp. | Cochrane Rob2 for RCT               | Overall: high<br><br>Randomisation: Low<br>Intervention: some concerns<br>Missing outcome data: high<br>Outcome measurement: some concerns<br>Selective reporting: Low |
| de Vries 2007     | Prospective observational cohort, monocentric, the                                                  | AS IFX (5 mg/kg/6 wk)     | Correlation between IFX level and ASAS response       | 38 pts (68% males, Age 40; HLA 84% : BASDAI 6,4                                                                             | 54 weeks | ASAS20 response criteria, drug level | At week 54, ASAS responders (n=21) had significantly higher drug levels than non-responders (n=17), 8.2 vs 6.3 ug/ml, p<0.01.                                                                                                                                                                                                                                                                                                                                                                                                               | Newcastle-Ottawa for cohort studies | Sum score: ***, *, ***<br><br>Selection: ***<br><br>Comparability: *                                                                                                   |

|                                                                           |                                                                        |                  |                                                                                                   |                                                                                                                                                |           |                                                                    |                                                                                                                                                                                                                                                                                                                                                                                                                                                                                                                                                                                                                                                                                                                                                                                                                                                                                              |                                     |                                                                                                                                                                                 |
|---------------------------------------------------------------------------|------------------------------------------------------------------------|------------------|---------------------------------------------------------------------------------------------------|------------------------------------------------------------------------------------------------------------------------------------------------|-----------|--------------------------------------------------------------------|----------------------------------------------------------------------------------------------------------------------------------------------------------------------------------------------------------------------------------------------------------------------------------------------------------------------------------------------------------------------------------------------------------------------------------------------------------------------------------------------------------------------------------------------------------------------------------------------------------------------------------------------------------------------------------------------------------------------------------------------------------------------------------------------------------------------------------------------------------------------------------------------|-------------------------------------|---------------------------------------------------------------------------------------------------------------------------------------------------------------------------------|
|                                                                           | Netherlands                                                            |                  |                                                                                                   |                                                                                                                                                |           |                                                                    |                                                                                                                                                                                                                                                                                                                                                                                                                                                                                                                                                                                                                                                                                                                                                                                                                                                                                              |                                     | Outcome: ***                                                                                                                                                                    |
| <b>GOLIMUMAB</b>                                                          |                                                                        |                  |                                                                                                   |                                                                                                                                                |           |                                                                    |                                                                                                                                                                                                                                                                                                                                                                                                                                                                                                                                                                                                                                                                                                                                                                                                                                                                                              |                                     |                                                                                                                                                                                 |
| Martinez-Feito 2018                                                       | Prospective observational cohort, multicentric, Spain, the Netherlands | axSpA, golimumab | Association between GLM levels and clinical response, determining the optimal concentration range | 49 pts, 48 years, 73% men, disease duration 10.5 years, HLAB27 69%, ASDAS 3.5, monotherapy 37%                                                 | 52 weeks  | Clinical response: ASDAS, ΔASDAS, GLM levels                       | <p>Patients with ASDAS&lt;2.1 at week 52 (LOCF, n=33, 69%) had higher trough levels than patients with ASDAS≥2.1 (n=16): 1.07 (0.7 – 1.9) vs. 0.6 (0.1 – 1.4) p&lt;0.01.</p> <p>In multivariable regression analysis, there was an association between golimumab levels and ASDAS at 24 weeks: r=-0.455, 95%CI -0.769 - -0.121, p&lt;0.01.</p> <p>Among patients with levels &lt;0.7 mg/l only one (7%) achieved major clinical improvement (ΔASAS ≥1.1). An additional 59% and 62.5% of patients in the 0.7-1.5-4 and &gt;1.4 mg/l group, respectively, achieved this treatment goal (p&gt;0.01).</p> <p>Of patients with levels &lt;0.7mg/l (n=15), 37% had ASDAS&lt;2.1 and 63% had ASDAS≥2.1</p> <p>Of patients with levels 0.7 – 1.4 mg/l, 88% had ASDAS&lt;2.1 and 12% had ASDAS≥2.1</p> <p>Of patients with levels &gt;1.4mg/l (n=16), 75% had ASDAS&lt;2.1 and 25% had ASDAS≥2.1</p> | Newcastle-Ottawa for cohort studies | <p>Sum score: ***, **, **</p> <p>Selection: ***</p> <p>Comparability: **</p> <p>Outcome: **</p>                                                                                 |
| <b>COMBINATION OF TNF INHIBITORS (adalimumab, etanercept, infliximab)</b> |                                                                        |                  |                                                                                                   |                                                                                                                                                |           |                                                                    |                                                                                                                                                                                                                                                                                                                                                                                                                                                                                                                                                                                                                                                                                                                                                                                                                                                                                              |                                     |                                                                                                                                                                                 |
| Arends 2010                                                               | Longitudinal observational cohort, monocentric, the Netherlands        | AS, ADA, IFX ETN | Association drug level and disease activity                                                       | 20 pts per drug (total 60 pts) age 42 63% male, disease duration 8 years, 84% HLA-B27+, DMARD 23% baseline BASDAI 5.9, CRP 17 ESR 25 ASDAS 3.8 | 12 months | drug level, antibodies, disease activity: BASDAI, ASDAS, CRP, ESR) | <p>Serum levels at 3, 6 and 12 months were mean 30.6, 36.3 and 23.4 for IFX, 3.1, 2.8 and 2.9 for ETN and 5.7, 5.5 and 8.0 for ADA, respectively.</p> <p>No significant correlations were found between IFX levels and BASDAI, CRP, ESR or ASDAS. ETN levels were negatively correlated with CRP at 12 months and ESR after 3, 6 and 12 months (p&lt;0.05). ADA levels were negatively correlated with BASDAI after 6 months, CRP after 12 months, ESR after 6 months and ASDAS after 3 months (p&lt;0.05)</p>                                                                                                                                                                                                                                                                                                                                                                               | Quality in Prognosis Studies Tool   | <p>1.Study participation: moderate</p> <p>2.Attrition: high</p> <p>3.Prognostic factor: high</p> <p>4.Outcome: low</p> <p>5.Confounding: high</p> <p>6.Statistics: moderate</p> |

**Peripheral spondyloarthritis including psoriatic arthritis + TNF inhibitors**

| Study             | Study design | Population | Scope/Intervention | Study population | Follow-up | Outcome measures | Results | Tool used for RoB assessment | Risk of Bias |
|-------------------|--------------|------------|--------------------|------------------|-----------|------------------|---------|------------------------------|--------------|
| <b>ADALIMUMAB</b> |              |            |                    |                  |           |                  |         |                              |              |

|                                                               |                                                                   |                                    |                                                                                                                                                        |                                                                                                                           |                                                                                      |                                                                          |                                                                                                                                                                                                                                                                                                                                                                                                                                                                    |                                     |                                                                                                                                                 |
|---------------------------------------------------------------|-------------------------------------------------------------------|------------------------------------|--------------------------------------------------------------------------------------------------------------------------------------------------------|---------------------------------------------------------------------------------------------------------------------------|--------------------------------------------------------------------------------------|--------------------------------------------------------------------------|--------------------------------------------------------------------------------------------------------------------------------------------------------------------------------------------------------------------------------------------------------------------------------------------------------------------------------------------------------------------------------------------------------------------------------------------------------------------|-------------------------------------|-------------------------------------------------------------------------------------------------------------------------------------------------|
| Chimenti 2016                                                 | Cross-sectional, observational, monocentric, Italy                | PsA ADA                            | Explore correlation with drug levels and clinical response                                                                                             | 30 pts, mean age 55 years, disease duration 12 years, treatment duration 56 (± 30) months, DAS 1.4, Serum ADA level 9.1   | N/A                                                                                  | DAS44 < 1.6 or ≥1.6, drug level, CRP, SJC                                | Significant inverse correlations between serum ADA levels and CRP (r=0.43, p<0.05) SJC (r=0.4, p<0.5) and DAS44-CRP (r=0.36, p<0.05).<br><br>Mean ADA concentration was significantly higher in patients with DAS <1.6 (n=18, mean 10.7 ug/ml) than in those with DAS ≥1.6 (n=12, mean 6.5 ug/ml).                                                                                                                                                                 | Newcastle-Ottawa for cohort studies | Sum score: **, - **<br>Selection: **<br>Comparability: -<br>Outcome: **                                                                         |
| Paramarta 2014                                                | Subanalysis of RCT, monocentric, the Netherlands                  | Peripheral SpA, ADA (no AS or PsA) | Association with drug levels and response to treatment                                                                                                 | 26 pts, no more information available                                                                                     | Single measurement, 2 weeks after last injection (treatment duration 12 or 24 weeks) | ASDAS inactive disease, adalimumab trough level                          | Median trough level at the end of this study was 11.5 ug/ml. Levels were not different between responders (12.6 IQR 7.3-16.2 ug/ml) and nonresponders (9.3 IQR 3.1 – 14.5 ug/ml). levels did also not correlate with other end of study disease activity parameters such as global assessment, TJC, SJC, BASDAI, ASDAS, ESR or CRP.                                                                                                                                | Newcastle-Ottawa for cohort studies | Sum score: ***, -, **<br>Selection: ***<br>Comparability: -<br>Outcome: **                                                                      |
| <b>INFLIXIMAB</b>                                             |                                                                   |                                    |                                                                                                                                                        |                                                                                                                           |                                                                                      |                                                                          |                                                                                                                                                                                                                                                                                                                                                                                                                                                                    |                                     |                                                                                                                                                 |
| Plasencia 2012                                                | Observational ambispective cohort study monocentric, Spain        | SpA, IFX                           | Influence of immunogenicity on long term treatment of IFX                                                                                              | 94 pts, 56% men, age 50 years, HLAB27 59%, DMARD therapy 77%, ASDAS 3.08                                                  | > 4 years                                                                            | ASDAS response, ifx level                                                | Patients with inactive disease had higher IFX levels (median, IQR) than those with active disease (inactive: 4992, 2976–8768 ng/ml vs. moderate: 2048, 840–4112 ng/ml vs. high: 1104, 0–3150 ng/ml, p=0.001 at 6 months; inactive: 4128, 2768–7824 ng/ml vs. moderate: 2336, 852–3568 ng/ml vs. high: 1328, 0–3366 ng/ml, p=0.010 at 1 year; inactive: 4192, 2872–5344 ng/ml vs. moderate: 2432, 636–4288 ng/ml vs. high: 308, 0–3296 ng/ml, p=0.009 at >4 years). | Newcastle-Ottawa for cohort studies | Sum score: ***, -, **<br>Selection: ***<br>Comparability: -<br>Outcome: **                                                                      |
| <b>COMBINATION OF TNF INHIBITORS (adalimumab, etanercept)</b> |                                                                   |                                    |                                                                                                                                                        |                                                                                                                           |                                                                                      |                                                                          |                                                                                                                                                                                                                                                                                                                                                                                                                                                                    |                                     |                                                                                                                                                 |
| Jani 2020                                                     | Prospective observational cohort study, multicenter (UK), OUTPASS | PsA, ETN, ADA                      | 1- whether the presence of ADAb/drug levels predicts treatment response 2- identify a drug level threshold for optimal therapeutic response 3- factors | ADA 97 pts, ETN 56 pts, age 51 yrs, BMI 28.9, female gender 46%, disease duration 5 yrs, DAS28: 4.9, CRP 7.5, MTX use 25% | 12 months                                                                            | Adalimumab and etanercept concentrations, disease activity (DAS28 (crp)) | Using GEE, ADA drug levels were significantly associated with ΔDAS28 over 12 months (β 0.055, 95% CI 0.011–0.099; p = 0.014). There was no significant association between ETN drug levels and ΔDAS28 over 12 months (β –0.039, 95% CI –0.31 to 0.23; p = 0.77).                                                                                                                                                                                                   | Quality in Prognosis Studies Tool   | 1.Study participation: moderate<br>2.Attrition: high<br>3.Prognostic factor: high<br>4.Outcome: low<br>5.Confounding: high<br>6.Statistics: low |

|  |  |  |                             |  |  |  |  |  |  |
|--|--|--|-----------------------------|--|--|--|--|--|--|
|  |  |  | associated with drug levels |  |  |  |  |  |  |
|--|--|--|-----------------------------|--|--|--|--|--|--|

**Combination of diseases and TNF inhibitors**

| Study               | Study design                                           | Population                                  | Scope/Intervention                                                                               | Study population                                                                                                                                                                                                                                                                                    | Follow-up | Outcome measures                                                                                          | Results                                                                                                                                                                                                                                                                                                                                                                                                                                                                                                                                                                                                                                                                                                                                                                                                                                                                                                       | Tool used for RoB assessment        | Risk of Bias                                                                                                                              |
|---------------------|--------------------------------------------------------|---------------------------------------------|--------------------------------------------------------------------------------------------------|-----------------------------------------------------------------------------------------------------------------------------------------------------------------------------------------------------------------------------------------------------------------------------------------------------|-----------|-----------------------------------------------------------------------------------------------------------|---------------------------------------------------------------------------------------------------------------------------------------------------------------------------------------------------------------------------------------------------------------------------------------------------------------------------------------------------------------------------------------------------------------------------------------------------------------------------------------------------------------------------------------------------------------------------------------------------------------------------------------------------------------------------------------------------------------------------------------------------------------------------------------------------------------------------------------------------------------------------------------------------------------|-------------------------------------|-------------------------------------------------------------------------------------------------------------------------------------------|
| Gehin 2019          | Observational cohort (NOR-DMARD), multicentric, Norway | RA, SpA, PsA, certolizumab                  | Association between serum levels, antibodies and treatment response                              | 116 SpA, 91 RA and 61 PsA.<br><br>SpA: age 42 years, female 47%, disease duration 2,6 years, ASDAS crp 2.6, DMARDs 19%.<br><br>RA age 54 years, female 79%, disease duration 10 years, DAS28 4.0, DMARDs 74%.<br><br>PsA age 50 years, female 66%, disease duration 6.6 years, DAS28 3.9 DMARDs 67% | 6 months  | Clinical response (ASDAS-CRP, improvement $\geq 1.1$ , DAS28, EULAR good/moderate, improvement $\geq 0.6$ | In multivariate analysis, levels $\geq 20$ mg/l were associated with ASDAS improvement at 3 (p=0.01) and 6 (p<0.01) months, greater improvement in DAS28 at 3 months (p=0.04) and borderline at 6 months (p=0.08) in RA, for PsA there was a trend towards greater improvement of DAS28 (p=0.14 at 3M; p=0.28 at 6months).<br><br>Serum levels $\geq 20$ mg/l were associated with response at 3 and 6 months (OR 2.3, 95% CI 1.2-4.5 p=0.01 and OR 1.9, 95% CI 1.0-3.5, p=0.05). Certolizumab levels $\geq 40$ mg/l were not associated with additional benefit.<br><br>ORs for clinical response with certolizumab levels < 20 vs. $\geq 20$ mg/l at 3 months were 3.4 (1.0-11.1, p<0.05), 1.5 (0.5-5.1, p=0.48) and 4.3 (1.0-17.9, p<0.05) for axSpA, RA and PsA, respectively, and at 6 months 3.3 (1.0-10.8, p<0.05), 1.1 (0.3-3.4, p=0.92), 3.3 (0.8-13.3, p=0.09) for axSpA, RA and PsA, respectively. | Quality in Prognosis Studies Tool   | 1.Study participation: low<br>2.Attrition: high<br>3.Prognostic factor: low<br>4.Outcome: low<br>5.Confounding: high<br>6.Statistics: low |
| Inciarte-Mundo 2016 | Cross-sectional study, monocentric, Spain              | RA, PsA, infliximab, etanercept, adalimumab | To analyse the accuracy of calprotectin and TNF1 trough serum levels in detecting PDUS synovitis | RA: 42 pts, 81% female, age 64 years, disease duration 16 years, treatment duration 83 months, DAS28 2.31<br><br>PsA: 50 pts, female 50%, age                                                                                                                                                       | N/A       | Trough levels, power dopler ultrasound (PDUS)                                                             | RA patients with PDUS synovitis had significantly lower ETN (0.98 (0.7-2.3) vs. 2.54 (0.2-4.7) ug/ml), ADA (1.68 (0.6-12) vs. 8.39 (4.2-12) ug/ml) and IFX (1.68 (0.6-11) vs. 8.39 (4.2-12) ug/ml) trough serum levels. (p<0.05 for all)<br><br>PsA patients with PDUS synovitis had lower trough serum levels of ETN (0.91 (0.6-1.6) vs. 1.38 (0.1-3.5) ug/ml) and ADA (0.88 (0.2-9.8) vs. 6.95 (4.1-12) ug/ml) but not IFX (2.86 (0.1-6.5) vs. 3.21 (0.7-7.7) ug/ml. (p<0,05 for ADA & ETN ; not for IFX)                                                                                                                                                                                                                                                                                                                                                                                                   | Newcastle-Ottawa for cohort studies | Sum score: *, -, *<br><br>Selection: *<br><br>Comparability: -<br><br>Outcome: *                                                          |

|                      |                                                                           |                         |                                                                                      |                                                                                                                                              |                                          |                                                                       |                                                                                                                                                                                                                                                                                                                                                                                                                                                                                                                                                                                            |                                     |                                                                                                                                                |
|----------------------|---------------------------------------------------------------------------|-------------------------|--------------------------------------------------------------------------------------|----------------------------------------------------------------------------------------------------------------------------------------------|------------------------------------------|-----------------------------------------------------------------------|--------------------------------------------------------------------------------------------------------------------------------------------------------------------------------------------------------------------------------------------------------------------------------------------------------------------------------------------------------------------------------------------------------------------------------------------------------------------------------------------------------------------------------------------------------------------------------------------|-------------------------------------|------------------------------------------------------------------------------------------------------------------------------------------------|
|                      |                                                                           |                         |                                                                                      | 55 years, disease duration 15 years, treatment duration 58 months, DAS28 1.82                                                                |                                          |                                                                       | <b>!! values for ADA and IFX RA are the same in the table, probably incorrect for IFX!!</b>                                                                                                                                                                                                                                                                                                                                                                                                                                                                                                |                                     |                                                                                                                                                |
| Ducourau 2011        | Prospective observational cohort                                          | RA, SpA IFX             | Correlation between antibodies, infliximab concentrations and infliximab maintenance | RA 17 pts, age 47-49 years, disease duration 6-10 years, MTX 43-60%.<br><br>SpA 91 pts, age 44-47 years, disease duration 5-9 years, MTX 32% | Up to 40 months (?) not completely clear | Trough level after treatment initiation and maintenance of infliximab | RA: trough concentrations at week 14 above median of >3.2 mg/l and above the first quartile (>0.05 mg/l) showed longer infliximab maintenance although not significantly (logrank 0.06 and 0.2, resp.)<br><br>SpA: trough concentrations at week 12 above median >13.7 mg/l was not associated with longer infliximab maintenance (logrank 0.9)<br><br>However maintenance was longer for SpA patients with concentrations above the first quartile (> 6.5 mg/l, logrank 0.05))                                                                                                            | Quality in Prognosis Studies Tool   | 1.Study participation: low<br>2.Attrition: moderate<br>3.Prognostic factor: high<br>4.Outcome: low<br>5.Confounding: high<br>6.Statistics: low |
| Gehin FRI0536 (2020) | EULAR abstract 2020<br><br>Observational study as part of NOR-DMARD study | RA, axial SpA, PsA, GLM | To identify the therapeutic target concentration of GLM                              | 91 pts (RA:20, PsA:30, AxSpA:41)                                                                                                             | 3 months                                 | Random GLM levels, treatment response (EULAR response, ASDAS, DAPSA)  | Golimumab serum concentrations varied considerably between patients on standard dose (range 0.0-8.2 mg/L) with a median of 2.2 (IQR 1.0-3.5) mg/L. The proportions of responders after 3 months among patients with golimumab concentration <1.0, 1.0-3.9 and ≥4.0 mg/L, were 19%, 49% and 74%, respectively. The proportion of responders was highest among patients with golimumab concentrations ≥4.0 mg/L, but the difference in response between patients with concentrations ≥4.0 mg/L compared to 1.0-4.0 mg/L was not statistically significant (OR 2.1 (95% CI 0.6-7.1), P=0.24). | Newcastle-Ottawa for cohort studies | Sum score: **, **, **<br><br>Selection: **<br><br>Comparability: **<br><br>Outcome: **                                                         |

**Optimal range:****Rheumatoid arthritis + TNF-inhibitors**

| Study             | Study design | Population | Scope/Intervention | Study population | Follow-up | Outcome measures | Results | Tool used for RoB assessment | Risk of Bias |
|-------------------|--------------|------------|--------------------|------------------|-----------|------------------|---------|------------------------------|--------------|
| <b>ADALIMUMAB</b> |              |            |                    |                  |           |                  |         |                              |              |

|             |                                                                                                                                                                                                                         |                                                                     |                                                                                              |                                                                                                                                                                         |           |                                                                |                                                                                                                                                                                                                                                                                                       |                                   |                                                                                                                                                         |
|-------------|-------------------------------------------------------------------------------------------------------------------------------------------------------------------------------------------------------------------------|---------------------------------------------------------------------|----------------------------------------------------------------------------------------------|-------------------------------------------------------------------------------------------------------------------------------------------------------------------------|-----------|----------------------------------------------------------------|-------------------------------------------------------------------------------------------------------------------------------------------------------------------------------------------------------------------------------------------------------------------------------------------------------|-----------------------------------|---------------------------------------------------------------------------------------------------------------------------------------------------------|
| Goss 2018   | RCT, CONCERTO trial, multinational                                                                                                                                                                                      | RA, ADA, 4 different dosages of MTX (2,5 ; 5 ; 10 ; 20mg/wk)        | Effect of MTX on adalimumab pharmacokinetics                                                 | 395 patients, 52 years, 75% female                                                                                                                                      | 26 weeks  | Response rates (DAS28crp <2.6 and < 3.2) and adalimumab levels | Percentage response DAS28crp <2.6 or < 3.2 per adalimumab range: 0-1.845 ug/ml: 24.7 and 40.4 %; 1.845-5.83 ug/ml: 34.8 and 49.4%; 5.83-8.935 ug/ml: 48.9 and 65.9%; >8.935 ug/ml: 48.3 and 68.5%, respectively.<br><br>Higher percentages of response up to 8,935 ug/ml, no additional benefit above | Cochrane RoB2 for RCT             | Overall: low<br><br>Randomisation: Low<br>Intervention: low<br>Missing outcome data: low<br>Outcome measurement: low<br>Selective reporting: Low        |
| Bouman 2017 | Combined data: Patients from the intervention arm of an open RCT investigating non-inferiority of a dose reduction strategy (ADA / ETN) and patients from an observational down titration study of IFX, the Netherlands | ADA ETN IFX RA (results for ADA only)                               | Association between drug level and successful dose reduction and discontinuation of the drug | ADA 42 pts ETN 76 pts IFX 51 pts. Age 58-61 years, 57-64% female, disease duration 7.5 – 13 years, DAS28 2.4-2.6, duration current treatment: 2.9-5.6 years, MTX 45-68% | 18 months | ADA trough level and successful dose reduction                 | For ADA, high trough levels were associated with successful dose reduction (AUC 0.86) with trough levels > 7.8 ug/ml showing a sensitivity of 100% and a specificity of 86%                                                                                                                           | Quality in Prognosis Studies Tool | 1.Study participation: moderate<br>2.Attrition: moderate<br>3.Prognostic factor: moderate<br>4.Outcome: low<br>5.Confounding: high<br>6.Statistics: low |
| Chen 2016   | Longitudinal observational cohort (dose-halving common)                                                                                                                                                                 | RA ADA Remission ( DAS28< 2.6) or low disease activity (DAS28 <3.2) | Correlation between ADA levels, and (persistent) clinical response after dose-halving        | 64 pts, 39% remission, 61% LDA.<br><br>86-92% female, disease duration 9 years, DAS28 2.2-3.15, MTX 86-91%                                                              | 24 weeks  | Optimal cut off drug level for persistent remission or LDA     | Optimal cut-off ADA trough level at baseline for predicting persistent remission after dose-halving was 6.4 ug/ml (AUC 0.998, p<0.001) and for predicting persistent LDA was 1.9 ug/ml (AUC 0.995, p<0.001)                                                                                           | Quality in Prognosis Studies Tool | 1.Study participation: high<br>2.Attrition: high<br>3.Prognostic factor: low<br>4.Outcome: low<br>5.Confounding: moderate<br>6.Statistics: high         |

|                   |                                                          |                |                                                                                                    |                                                                                                                                        |                                             |                                                                                           |                                                                                                                                                                                                                                                                                                                                                                                                               |                                     |                                                                                                                                                |
|-------------------|----------------------------------------------------------|----------------|----------------------------------------------------------------------------------------------------|----------------------------------------------------------------------------------------------------------------------------------------|---------------------------------------------|-------------------------------------------------------------------------------------------|---------------------------------------------------------------------------------------------------------------------------------------------------------------------------------------------------------------------------------------------------------------------------------------------------------------------------------------------------------------------------------------------------------------|-------------------------------------|------------------------------------------------------------------------------------------------------------------------------------------------|
|                   | practice in Taiwan)                                      |                |                                                                                                    |                                                                                                                                        |                                             |                                                                                           |                                                                                                                                                                                                                                                                                                                                                                                                               |                                     |                                                                                                                                                |
| Pouw 2015         | Prospective observational cohort                         | RA ADA         | Determine the concentration-effect relationship of adalimumab in RA                                | 221 pts, 54 years, 80% female, disease duration 8 years, DAS28 5.3, MTX 77%                                                            | 28 weeks                                    | ΔDAS28 and adalimumab level                                                               | To reach a DAS28 improvement of 1.2 or more, trough levels of 3 ug/ml appear to be sufficient. Serum levels up to 8 ug/ml show a positive association with ΔDAS28. However, it appears that levels above 8 μg/mL did not give further improvement of clinical efficacy<br><br>A cut off value of 5 ug/ml had an AUC of 0.695 (95%CI 0.626 – 0.764, p<0.0001) with a sensitivity of 91% and specificity of 43% | Quality in Prognosis Studies Tool   | 1.Study participation: moderate<br>2.Attrition: high<br>3.Prognostic factor: low<br>4.Outcome: low<br>5.Confounding: high<br>6.Statistics: low |
| Rosas 2014        | Cross-sectional study. Multicenter Spain                 | RA, adalimumab | To assess the usefulness of measuring serum adalimumab levels after at least 3 months of treatment | 57 pts, female 79%, age 63 years, disease duration 14 years, concomitant DMARD 100%, DAS28 2.7, SDAI 6.4, treatment duration 2.7 years | N/A                                         | DAS28(ESR): remission<2.6, low activity 2.6–3.1, moderate3.2–5.1, severe >5.1, drug level | A cut-off value of 4.3 mg/l was associated with low disease activity (DAS28 ≤3.2) with an AUC of 0.83 (95% CI 0.688-0.919, sensitivity 88%, specificity 60%)<br>88% of patients with an level> 4.3 mg/l showed a DAS28≤3.2.                                                                                                                                                                                   | Newcastle-Ottawa for cohort studies | Sum score: **, -, *<br>Selection: **<br>Comparability: -<br>Outcome: *                                                                         |
| Ternant 2015      | Prospective observational study, post hoc PK/PD modeling | RA adalimumab  | PK and concentration-effect relationship of adalimumab in RA                                       | 30 pts, female 77%, age 55 years, DAS28 5.6, MTX 100%                                                                                  | 52 weeks                                    | IC50                                                                                      | IC50 11.0 mg/l                                                                                                                                                                                                                                                                                                                                                                                                | Newcastle-Ottawa for cohort studies | Sum score: **, -, **<br>Selection: **<br>Comparability: -<br>Outcome: **                                                                       |
| Ducourau 2014     | Post hoc analysis, France                                | RA adalimumab  | Relationship between drug level and DAS28                                                          | 30 pts,                                                                                                                                | 52 weeks                                    | IC50, DAS28                                                                               | With a baseline DAS28 of 5.7, the IC50 of adalimumab was 11.8 mg/l. There was a large interindividual variability in IC50                                                                                                                                                                                                                                                                                     | Newcastle-Ottawa for cohort studies | Sum score: **, -, **<br>Selection: **<br>Comparability: -<br>Outcome: **                                                                       |
| <b>ETANERCEPT</b> |                                                          |                |                                                                                                    |                                                                                                                                        |                                             |                                                                                           |                                                                                                                                                                                                                                                                                                                                                                                                               |                                     |                                                                                                                                                |
| Breedveld 2018    | Randomised, double blind, placebo controlled,            | RA ETN         | PK and PD assessment of etanercept in dosages ranging from 10 mg once                              | 61 pts, (49 ETN, 12 placebo). Age 49-55 years, female 67-100%, disease duration                                                        | Intervention 4 weeks + 4 weeks of follow-up | Concentration effect curve (SJC and TJC and ESR vs drug level)                            | There was no increase in percentage change of TJC and SJC with etanercept levels above 2000 ng/ml, despite increased etanercept concentrations.                                                                                                                                                                                                                                                               | Cochrane Rob2 for RCT               | Overall: low<br><br>Randomisation: Low<br>Intervention: low<br>Missing outcome data: low                                                       |

|                   |                                                                       |               |                                                                         |                                                                                                                                          |          |                                                                            |                                                                                                                                                                                                                                                                                                                                                                                                                                                             |                                     |                                                                                                                                           |
|-------------------|-----------------------------------------------------------------------|---------------|-------------------------------------------------------------------------|------------------------------------------------------------------------------------------------------------------------------------------|----------|----------------------------------------------------------------------------|-------------------------------------------------------------------------------------------------------------------------------------------------------------------------------------------------------------------------------------------------------------------------------------------------------------------------------------------------------------------------------------------------------------------------------------------------------------|-------------------------------------|-------------------------------------------------------------------------------------------------------------------------------------------|
|                   | parallel-dose study                                                   |               | weekly to 50 mg twice weekly                                            | 3.5-6.5 years, CRP 37-72 mg/L, ESR 31-64 mm/h                                                                                            |          |                                                                            | Percentage change in SJC from baseline per concentration range (ng/ml):<br>0-99 1%; 100-499 14%; 500-999 41%; 1000-1999 33%; 2000-2999 52%; 3000-6080 54%                                                                                                                                                                                                                                                                                                   |                                     | Outcome measurement: low<br>Selective reporting: Low                                                                                      |
|                   |                                                                       |               |                                                                         |                                                                                                                                          |          |                                                                            | Percentage change in TJC from baseline per concentration range (ng/ml):<br>0-99 16%; 100-499 15%; 500-999 31%; 1000-1999 52%; 2000-2999 62%; 3000-6080 69%                                                                                                                                                                                                                                                                                                  |                                     |                                                                                                                                           |
|                   |                                                                       |               |                                                                         |                                                                                                                                          |          |                                                                            | Percentage change in ESR from baseline per concentration range (ng/ml):<br>0-99 9%; 100-499 17%; 500-999 26%; 1000-1999 37%; 2000-2999 22%; 3000-6080 37%                                                                                                                                                                                                                                                                                                   |                                     |                                                                                                                                           |
| Daien 2012        | Prospective observational cohort, pilot, monocentric, France          | RA ETN        | Explore predictive value of etanercept levels for response to treatment | 19 pts, all female, age 56 years, disease duration 5 years, DAS28 4.85, MTX 12 pts, LEF 5 pts                                            | 6 months | DAS28, EULAR response, (remission DAS28<2.6, LDA DAS28 2.6-3.2) drug level | A concentration of 3.1 ug/ml at 3 months was associated with 6 months responder status (sens. 87% spec. 67%)<br>With this threshold, the DAS28 at 6 months was significantly higher in patients with low than in those with high median 3-month ETN concentrations (4.43, IQR 2.50–5.23, vs. 2.94, IQR 1.82–4.57; p = 0.02)<br><br>Therapeutic maintenance was 33 vs. 77% for patients with 3 month ETN levels of <3.1 and ≥3.1 ug/ml, respectively, p=0.11 | Quality in Prognosis Studies Tool   | 1.Study participation: high<br>2.Attrition: low<br>3.Prognostic factor: low<br>4.Outcome: low<br>5.Confounding: high<br>6.Statistics: low |
| <b>INFLIXIMAB</b> |                                                                       |               |                                                                         |                                                                                                                                          |          |                                                                            |                                                                                                                                                                                                                                                                                                                                                                                                                                                             |                                     |                                                                                                                                           |
| Mulleman 2010     | Cross-sectional cohort, followed up for 42 weeks, monocentric, France | RA IFX        | Predictive value of trough levels for sustainable clinical response     | 28 pts, 20 female, age 59 years, treatment duration 45 months, IFX dose: 4.1 (2.7-5.9) mg/kg / 8.1 (5.0-12.4) weeks, DAS28 3.0 (0.8-7.6) | 42 weeks | Infliximab concentration, DAS28 ≤ or > 3.2                                 | An infliximab concentration greater than 1.037 mg/l predicted low disease activity (DAS28≤3.2) with 84% sensitivity and 78% specificity, AUC 0.83 p<0.01                                                                                                                                                                                                                                                                                                    | Newcastle-Ottawa for cohort studies | Sum score: **, -, *<br><br>Selection: **<br><br>Comparability: -<br><br>Outcome: *                                                        |
| Siljehult 2018    | Prospective observational cohort. Sweden                              | RA infliximab | Correlation between drug levels and clinical response                   | 94 pts, female 83%, age disease onset 42 years, disease duration 14 years, DAS28 5.6, DMARDs                                             | 54 weeks | DAS28, infliximab levels                                                   | An IFX concentration ≥ 4.66 µg/mL at 14 weeks predicted a moderate to good response at 52 weeks, with a specificity of 91.3% and a sensitivity of 39.3% (AUC 0.689)                                                                                                                                                                                                                                                                                         | Quality in Prognosis Studies Tool   | 1.Study participation: moderate<br>2.Attrition: high<br>3.Prognostic factor: moderate<br>4.Outcome: moderate<br>5.Confounding: high       |

|                     |                                                               |               |                                                                                            |                                                                                    |           |                                                                                |                                                                                                                                                                                                                                                                                                                                                                                                                                                                                                                                                                                                                                                                                                                                                                                                                                                                                                                                                                                                                                                                                                                                                                                                                                                                                       |                                   |                                                                                                                                                                                                                              |
|---------------------|---------------------------------------------------------------|---------------|--------------------------------------------------------------------------------------------|------------------------------------------------------------------------------------|-----------|--------------------------------------------------------------------------------|---------------------------------------------------------------------------------------------------------------------------------------------------------------------------------------------------------------------------------------------------------------------------------------------------------------------------------------------------------------------------------------------------------------------------------------------------------------------------------------------------------------------------------------------------------------------------------------------------------------------------------------------------------------------------------------------------------------------------------------------------------------------------------------------------------------------------------------------------------------------------------------------------------------------------------------------------------------------------------------------------------------------------------------------------------------------------------------------------------------------------------------------------------------------------------------------------------------------------------------------------------------------------------------|-----------------------------------|------------------------------------------------------------------------------------------------------------------------------------------------------------------------------------------------------------------------------|
|                     |                                                               |               |                                                                                            | 95,7%, MTX 77%, IFX dose 3.3 (±0.6) mg/kg                                          |           |                                                                                | Patients with a good response at 14 weeks and an IFX concentration > 0.5 µg/mL were still good to moderate responders after 52 weeks (16/18; 88.9%).                                                                                                                                                                                                                                                                                                                                                                                                                                                                                                                                                                                                                                                                                                                                                                                                                                                                                                                                                                                                                                                                                                                                  |                                   | 6.Statistics: moderate                                                                                                                                                                                                       |
| Van den Bemt 2013   | Prospective observational cohort. Monocenter, the Netherlands | RA infliximab | Early prediction of clinical response based on disease activity and trough level           | 57 pts, age 57 years, 63% female, disease duration 6.1 years, DAS28 5.0, MTX 59%   | 6 months  | Infliximab trough level at week 2, 6, 14 EULAR response, DAS28                 | <p>Patients with a good EULAR response after 6 months tended to have higher infliximab serum trough concentrations (2 weeks 23.4 mg/l (±20.8), 6 weeks 12.3 mg/l (±6.1)) compared with non- or partially responding patients (2 weeks 16.0 mg/l (±10.4), 6 weeks: 9.0 mg/l (±6.8)).</p> <p>After 14 weeks, infliximab serum trough concentrations tended to be higher in the group of EULAR responders compared with the non-responders (median (interquartile range) 0.9 (0.05–2.6) vs. 2.0 (0.7–5.4) mg l<sup>-1</sup>, P = 0.06).</p> <p>After 6 weeks, all patients with infliximab serum trough concentrations &lt;2.5 mg/l (n = 9) did not attain infliximab response, while 15 of 46 patients with infliximab serum trough concentrations &gt;2.5 mg/l reached good EULAR response (ROC area 0.67 (95% CI 0.52, 0.82), sensitivity 100%, specificity 23%, PPV 35%, NPV 100%)</p> <p>the Youden index was maximized with DAS scores after 6 weeks ≥4.2 and/or infliximab serum trough concentrations ≤2.5 mg/l (sensitivity 100%, specificity: 54%, PP: 45%, NP:100%, Youden index 0.54). Consequently, none of the 21 of 54 (39%) patients with either DAS28 at 6weeks ≥4.2 and/or infliximab serum trough concentrations ≤2.5 mg/l reached EULAR response after 6 months.</p> | Quality in Prognosis Studies Tool | <ol style="list-style-type: none"> <li>1.Study participation: low</li> <li>2.Attrition: high</li> <li>3.Prognostic factor: ?</li> <li>4.Outcome: low</li> <li>5.Confounding: high</li> <li>6.Statistics: low</li> </ol>      |
| <b>CERTOLIZUMAB</b> |                                                               |               |                                                                                            |                                                                                    |           |                                                                                |                                                                                                                                                                                                                                                                                                                                                                                                                                                                                                                                                                                                                                                                                                                                                                                                                                                                                                                                                                                                                                                                                                                                                                                                                                                                                       |                                   |                                                                                                                                                                                                                              |
| Jani 2017           | Prospective observational cohort (BRAGSS) multicenter UK      | RA CZP        | Association between random certolizumab levels, antidrug antibodies and treatment response | 115 pts, age 58 years, female 70%, disease duration 7 years, DAS28 5.9 MTX use 53% | 12 months | Random drug levels, EULAR response, change in DAS28crp, adherence to treatment | <p>In a concentration effect curve, there was a trend for higher certolizumab levels (&gt;23-24 ug/ml) to be associated with improvement in DAS28 from baseline. Patients with the highest certolizumab levels had a higher proportion of EULAR response at 12 months.</p> <p>(no statistics)</p>                                                                                                                                                                                                                                                                                                                                                                                                                                                                                                                                                                                                                                                                                                                                                                                                                                                                                                                                                                                     | Quality in Prognosis Studies Tool | <ol style="list-style-type: none"> <li>1.Study participation: low</li> <li>2.Attrition: moderate</li> <li>3.Prognostic factor: low</li> <li>4.Outcome: low</li> <li>5.Confounding: low</li> <li>6.Statistics: low</li> </ol> |

|                                                               |                                                                                   |                |                                                                                          |                                                                                                                                                                   |           |                                                                                |                                                                                                                                                                                                                                                                                                                                                                                                                                                                                     |                                   |                                                                                                                                                                  |
|---------------------------------------------------------------|-----------------------------------------------------------------------------------|----------------|------------------------------------------------------------------------------------------|-------------------------------------------------------------------------------------------------------------------------------------------------------------------|-----------|--------------------------------------------------------------------------------|-------------------------------------------------------------------------------------------------------------------------------------------------------------------------------------------------------------------------------------------------------------------------------------------------------------------------------------------------------------------------------------------------------------------------------------------------------------------------------------|-----------------------------------|------------------------------------------------------------------------------------------------------------------------------------------------------------------|
| Paul 2020                                                     | Pooled analyses of 3 RCTs (RAPID1 RAPID2 (+ open label extension) and EXXELERATE) | RA CZP         | to identify plasma concentrations of CZP associated with improvement of disease activity | 1935 pts, female 78-82%, age 52-53 yrs, disease duration 6 yrs, BMI 26-28, DAS28 (crp) 5.6-6.1                                                                    | 24 wks    | CZP concentration, DAS28crp                                                    | CZP concentration thresholds of at least 28.0 µg/ml (sensitivity: 86.0%; specificity: 20.2%) at week 12 and 23.2 µg/ml (sensitivity: 89.6%; specificity: 19.7%) at week 24 were associated with achievement of DAS28(CRP) remission (<2.3) at these time points.<br>CZP thresholds of 30.4 µg/ml (sensitivity: 80.0%; specificity: 24.2%) at week 12 and 17.6 µg/ml (sensitivity: 93.3%; specificity: 17.0%) at week 24 were associated with achievement of DAS28(CRP) LDA (≤ 2.7). | Quality in Prognosis Studies Tool | 1.Study participation: moderate<br>2.Attrition: high<br>3.Prognostic factor: high<br>4.Outcome: high<br>5.Confounding: high<br>6.Statistics: low                 |
| <b>COMBINATION OF TNF INHIBITORS (adalimumab, etanercept)</b> |                                                                                   |                |                                                                                          |                                                                                                                                                                   |           |                                                                                |                                                                                                                                                                                                                                                                                                                                                                                                                                                                                     |                                   |                                                                                                                                                                  |
| Chen 2015                                                     | Longitudinal observational cohort, Taiwan                                         | RA ADA and ETN | Association between drug levels and therapeutic response                                 | ADA 36 pts, 53 years, 89% female, disease duration 5.4 years, DAS28 6.1, MTX 89% ETN 34 pts, 58 years, 88% female, disease duration 5.4 years, DAS28 5.95 MTX 88% | 12 months | EULAR response and drug level                                                  | Depending on the assay used, optimal adalimumab and etanercept cut-offs for achieving EULAR good response at 6 and 12 months was:<br><br>ELISA (Progenika) 6 months<br>ADA: 1.27 ug/ml (sens 90%, spec 100%)<br>ETN: 1.24 ug/ml (sens80%, spec 100%)<br>ELISA (Progenika) 12 months<br>ADA 1.05 ug/ml (sens 100%, spec 100%)<br>ETN 0.8 ug/ml (sens 85%, spec 85%)<br><br>ELISA (Sanquin) 12 months<br>ADA 0.801 ug/ml (sens 95%, spec 100%)<br>ETN 0.7 ug/ml (sens 84%, spec 100%) | Quality in Prognosis Studies Tool | 1.Study participation: high<br>2.Attrition: ?<br>3.Prognostic factor: moderate<br>4.Outcome: low<br>5.Confounding: high<br>6.Statistics: moderate                |
| Jani 2015                                                     | Prospective observational cohort (BRAGGSS), multicenter, UK                       | RA ADA, ETN    | Random drug levels, clinical response and adherence to therapy                           | ADA 160 pts, age 56.2 years, 70% female, disease duration 8.6 years, DAS28 5.7, MTX 55%.<br><br>ETN 171 pts, 57 years, 80% female, disease duration 7,8           | 12 months | Random drug levels, EULAR response, change in DAS28crp, adherence to treatment | Concentration effect curve adalimumab: drug concentration < 5ug/ml was associated with lower change in DAS28<br><br>The predictive value of drug levels at 3 months for EULAR response at 12 months was (AUC) 0.66 (95% CI 0.55-0.77) for adalimumab<br><br>Drug levels < 1.0 ug/ml was associated with no response (rc 2.29 95% CI 1.13-3.44 p<0.0001) for adalimumab<br><br>Concentration effect curve for etanercept did not reveal a clear therapeutic window                   | Quality in Prognosis Studies Tool | 1.Study participation: moderate<br>2.Attrition: moderate<br>3.Prognostic factor: moderate<br>4.Outcome: moderate<br>5.Confounding: moderate<br>6.Statistics: low |

|                     |                       |                            |                                                                                                                |                                                                                                                                        |           |                                                                      |                                                                                                                                                                                                                                                                                                                                                                                                                                                                                                                                                                                                                                                                                                                                                                                                                                                                                                                          |                                     |                                                                            |
|---------------------|-----------------------|----------------------------|----------------------------------------------------------------------------------------------------------------|----------------------------------------------------------------------------------------------------------------------------------------|-----------|----------------------------------------------------------------------|--------------------------------------------------------------------------------------------------------------------------------------------------------------------------------------------------------------------------------------------------------------------------------------------------------------------------------------------------------------------------------------------------------------------------------------------------------------------------------------------------------------------------------------------------------------------------------------------------------------------------------------------------------------------------------------------------------------------------------------------------------------------------------------------------------------------------------------------------------------------------------------------------------------------------|-------------------------------------|----------------------------------------------------------------------------|
|                     |                       |                            |                                                                                                                | years, DAS28 5.9, MTX 46%                                                                                                              |           |                                                                      |                                                                                                                                                                                                                                                                                                                                                                                                                                                                                                                                                                                                                                                                                                                                                                                                                                                                                                                          |                                     |                                                                            |
| Van Herwaarden 2015 | Post hoc analysis RCT | RA, adalimumab, etanercept | To investigate whether random timed drug levels are predictive of successful dose reduction or discontinuation | 118 pts,                                                                                                                               | 18 months | Random timed drug level before treatment adaptation (down-titration) | <p>Random timed adalimumab levels for patients who successfully stopped (n=11), successfully dose reduced (n=15) or were not able to reduce the dose (n=16) were 8.5 (2.8), 8.1 (5.2) and 6.8 (4.1) mg/l, respectively. there was no statistically significant difference between these levels.</p> <p>Random timed etanercept levels for patients who successfully stopped (n=11), successfully dose reduced (n=37) or were not able to reduce the dose (n=28) were 2.7 (1.3), 2.0 (0.9) and 2.4 (1.0) mg/l, respectively. there was no statistically significant difference between these levels.</p> <p>ROC analyses showed no significant predictive value of TNFi serum levels for successful dose reduction or discontinuation.</p> <p>In a sensitivity analysis, for adalimumab, high trough levels were associated with successful dose reduction (AUC 0.86, 95% CI 0.58 to 1.00, optimal cut-off 7.8 mg/L).</p> | Newcastle-Ottawa for cohort studies | Sum score: ***, -, **<br>Selection: ***<br>Comparability: -<br>Outcome: ** |
| Sanmarti 2015       | Cross-sectional study | RA etanercept, adalimumab  | Confirmation of the study results by Chen et al 2015, optimal cut-offs for adalimumab and etanercept           | 127 patients in total, 54 adalimumab, 73 etanercept. 82% female, age 61 years, disease duration 13 years, treatment duration 60 months | N/A       | DAS28≤2.6, etanercept and adalimumab trough level cut-offs           | Trough levels with the greatest discriminative capacity for remission (DAS28≤2.6) were 1.336 µg/mL for adalimumab (sensitivity 81.9%, specificity 81%) and 1.56 µg/mL for etanercept (sensitivity 71.1%, specificity 71.4%). For adalimumab AUC was 0.81 (95% CI 0.68 to 0.94) and for etanercept 0.747 (95% CI 0.68 to 0.85)                                                                                                                                                                                                                                                                                                                                                                                                                                                                                                                                                                                            | Newcastle-Ottawa for cohort studies | Sum score: ***, -, **<br>Selection: ***<br>Comparability: -<br>Outcome: ** |

**Rheumatoid arthritis + other biologics**

| Study              | Study design                    | Population                       | Scope/Intervention   | Study population  | Follow-up | Outcome measures | Results                                                                                                         | Tool used for RoB assessment | Risk of Bias                                                                         |
|--------------------|---------------------------------|----------------------------------|----------------------|-------------------|-----------|------------------|-----------------------------------------------------------------------------------------------------------------|------------------------------|--------------------------------------------------------------------------------------|
| <b>TOCILIZUMAB</b> |                                 |                                  |                      |                   |           |                  |                                                                                                                 |                              |                                                                                      |
| Abdallah 2017      | Pooled data RCTs (SUMMACT A and | RA, tocilizumab after inadequate | PK/PD sc tocilizumab | N/A (supp tab S1) | 24 weeks  | PK/PD            | Mean steady state toc iv 8 mg/kg every 4 weeks at 24 weeks was 18 ug/ml. For sc dosing 162 mg weekly: 40 ug/ml. | Cochrane RoB2 for RCT        | Overall: low<br>Randomisation: Low<br>Intervention: low<br>Missing outcome data: low |

|                |                                                   |                          |                                                                                                         |                                                                                                   |          |                                               |                                                                                                                                                                                                                                                                                                                                                                                                                                                                    |                                     |                                                                              |
|----------------|---------------------------------------------------|--------------------------|---------------------------------------------------------------------------------------------------------|---------------------------------------------------------------------------------------------------|----------|-----------------------------------------------|--------------------------------------------------------------------------------------------------------------------------------------------------------------------------------------------------------------------------------------------------------------------------------------------------------------------------------------------------------------------------------------------------------------------------------------------------------------------|-------------------------------------|------------------------------------------------------------------------------|
|                | BREVACTA), population pharmacokinetic model       | DMARD response           |                                                                                                         |                                                                                                   |          |                                               | No concentration response relation was shown for ACR response and trough concentrations for tocilizumab iv. For the weekly SC dose there was a concentration effect observed, patients in the lowest trough level quartile (mean TCZ concentration 14.6 ug/ml) had poorer ACR responses (ACR20 63%; ACR50 39%; ACR70 20%), the concentration effect relation plateaued in the second quartile (mean TCZ concentration 32.7 ug/ml, ACR20 76%, ACR50 52%, ACR70 28%) |                                     | Outcome measurement: low<br>Selective reporting: Low                         |
| Kneepkens 2017 | Prospective observational cohort, the Netherlands | RA TCZ 8mg/kg/4 weeks iv | Investigating the variation in serum TCZ concentrations and the relationship with clinical measurements | 66 pts, age 56 years, female 82%, disease duration 11 years, DAS28 5.4, MTX 64%, prednisolone 70% | 24 weeks | CRP, TCZ levels, DAS28 improvement $\geq 1.2$ | At baseline, 26 patients had a CRP level above 10mg/l with a median of 37.7mg/l (21.9-49.7). TCZ concentrations above 1 mg/l were sufficient to normalize CRP levels.<br><br>The cut off of 1 mg/l was also associated with a clinical relevant improvement in DAS28 ( $\geq 1.2$ ) rc 0.080, 95%CI 0.039-0.113. 12 patients did not achieve this improvement, eight of them had a TCZ concentration below 1 mg/l                                                  | Newcastle-Ottawa for cohort studies | Sum score: ***, -, ***<br>Selection: ***<br>Comparability: -<br>Outcome: *** |

**Axial spondyloarthritis + TNF inhibitors**

| Study             | Study design                                               | Population    | Scope/Intervention                                                                                                              | Study population                                                                                                 | Follow-up | Outcome measures                                                          | Results                                                                                                                                                                                                                                                                                                                                                                 | Tool used for RoB assessment        | Risk of Bias                                                                                                                                             |
|-------------------|------------------------------------------------------------|---------------|---------------------------------------------------------------------------------------------------------------------------------|------------------------------------------------------------------------------------------------------------------|-----------|---------------------------------------------------------------------------|-------------------------------------------------------------------------------------------------------------------------------------------------------------------------------------------------------------------------------------------------------------------------------------------------------------------------------------------------------------------------|-------------------------------------|----------------------------------------------------------------------------------------------------------------------------------------------------------|
| <b>ADALIMUMAB</b> |                                                            |               |                                                                                                                                 |                                                                                                                  |           |                                                                           |                                                                                                                                                                                                                                                                                                                                                                         |                                     |                                                                                                                                                          |
| Marsman 2016      | Observational cohort, multicenter, the Netherlands, Taiwan | AS ADA        | To determine the concentration-effect relationship of ADA in AS                                                                 | 102 pts, 42 years, 67% male, disease duration 7 years, HLAB27 83%, ASDAScrp 3.4, BASDAI 6.2                      | 6 months  | $\Delta$ BASDAI 0-6 months and $\Delta$ ASDAS 0-6 months, CRP, drug level | No significant correlation between adalimumab level at 24 weeks and $\Delta$ ASDAS or $\Delta$ BASDAI was found. No therapeutic window could be identified.<br><br>The median (interquartile) drug level in patients with low CRP was significantly higher than in patients with high CRP at baseline [respectively 10.6 (3.9 – 16.2) vs. 6.9 (1.0 – 12.6); p = 0.019]. | Quality in Prognosis Studies Tool   | 1.Study participation: moderate<br>2.Attrition: high<br>3.Prognostic factor: moderate<br>4.Outcome: moderate<br>5.Confounding: high<br>6.Statistics: low |
| Senabre 2019      | Cross-sectional, Spain                                     | AS adalimumab | To assess the prevalence of anti-drug antibodies in patients with axSpa, to investigate their relationship with serum levels of | 51 pts, age 47 years, disease duration 71 months, HLAB27 82%, BASDAI 4.2, ASDAScrp 2.0, ASDASesr 2.3, adalimumab | N/A       | BASDAI, ASDAS (CRP/ESR), trough levels                                    | The adalimumab level cut-offs and area under the curve (AUC) obtained in the ROC curves were 4.6 mg/l (AUC 81.2%; 95% CI 67.5–94.9), 7.7 mg/l (AUC 82.4%; 95% CI 69.3–95.5) and 6.4 mg/l (AUC 73.5%; 95% CI 58.6–88.3) for ASDAS-CRP<2.1, ASDAS-ESR<2.1 and BASDAI<4, respectively                                                                                      | Newcastle-Ottawa for cohort studies | Sum score: **, **, *<br>Selection: **<br>Comparability: **<br>Outcome: *                                                                                 |

|                                |                                                                |                       |                                                                              |                                                                                                                                                                                                                                                        |          |                                            |                                                                                                                                                                                                                                                                                                                                                                                                                                                                                                                     |                                     |                                                                                                                                                   |
|--------------------------------|----------------------------------------------------------------|-----------------------|------------------------------------------------------------------------------|--------------------------------------------------------------------------------------------------------------------------------------------------------------------------------------------------------------------------------------------------------|----------|--------------------------------------------|---------------------------------------------------------------------------------------------------------------------------------------------------------------------------------------------------------------------------------------------------------------------------------------------------------------------------------------------------------------------------------------------------------------------------------------------------------------------------------------------------------------------|-------------------------------------|---------------------------------------------------------------------------------------------------------------------------------------------------|
|                                |                                                                |                       | adalimumab and disease activity                                              | treatment 9.8 months                                                                                                                                                                                                                                   |          |                                            |                                                                                                                                                                                                                                                                                                                                                                                                                                                                                                                     |                                     |                                                                                                                                                   |
| Ding 2020                      | Observational cohort study, monocentric, China                 | AS adalimumab         | To determine a concentration-effect curve for adalimumab in patients with AS | 31 pts, age 31 yrs, male 94%, disease duration 7 yrs, CRP 16 mg/l, ASDAScrp 4.06, BASDAI 6.1, NSAIDs 15%                                                                                                                                               | 12 weeks | ADA concentrations, ASDAS                  | To reach clinically important improvement ( $\Delta$ ASDAS $\geq$ 1.1), concentrations of $\sim$ 2.5 $\mu$ g/mL seem to be already sufficient. Levels of $\sim$ 8 $\mu$ g/mL show major improvement ( $\Delta$ ASDAS $\geq$ 2.0). Serum levels up to 12 $\mu$ g/mL show a positive association with $\Delta$ ASDAS.<br><br>In general, adalimumab trough concentrations between 8 and 12 $\mu$ g/mL seem optimal.<br>No significant correlation between adalimumab levels at week 12 and $\Delta$ BASDAI was found. | Quality in Prognosis Studies Tool   | 1.Study participation: moderate<br>2.Attrition: high<br>3.Prognostic factor: ?<br>4.Outcome: low<br>5.Confounding: high<br>6.Statistics: low      |
| Senabre-Gallego FRI0295 (2020) | EULAR abstract 2020, cross-sectional                           | Axial SpA, adalimumab | Association between drug retention rates and adalimumab levels               | 51 pts, age 46,9 (18–68), 47.1% female, HLAB27+ 82,4%, disease duration 122,9 months (2-408), duration of treatment 17,8 months (1-69). Concomitant DMARD 21.6% (MTX 15.7%) BASDAI 4.0 $\pm$ 2.3; ASDAS-crp 2.1 $\pm$ 1.1 and ASDAS-esr 2.1 $\pm$ 1.0. | N/A      | Adalimumab drug level, treatment retention | Multivariate analyses showed an ADA level > 3 mg/L was a protective factor for ADA discontinuation (HR 0.01 (0.00-0.59, p=0.026),                                                                                                                                                                                                                                                                                                                                                                                   | Newcastle-Ottawa for cohort studies | Sum score: **, **, **<br><br>Selection: **<br><br>Comparability: **<br><br>Outcome: **                                                            |
| <b>ETANERCEPT</b>              |                                                                |                       |                                                                              |                                                                                                                                                                                                                                                        |          |                                            |                                                                                                                                                                                                                                                                                                                                                                                                                                                                                                                     |                                     |                                                                                                                                                   |
| Kneepkens 2015                 | Prospective observational cohort, monocentric, the Netherlands | AS ETN                | association between drug levels and clinical response                        | 162 pts, age 43 years, men 71%, disease duration 8 years, HLAB27 73%, ASDAScrp 3.6, NSAID 70%                                                                                                                                                          | 24 weeks | ASDASCRP, BASDAI, drug levels              | A clear therapeutic window, based on a concentration effect curve could not be identified                                                                                                                                                                                                                                                                                                                                                                                                                           | Quality in Prognosis Studies Tool   | 1.Study participation: moderate<br>2.Attrition: moderate<br>3.Prognostic factor: low<br>4.Outcome: low<br>5.Confounding: low<br>6.Statistics: low |

|                     |                                                                       |                  |                                                                                                   |                                                                                                |          |                                              |                                                                                                                                                                                                                                                                                                                                                                                                                                                                                                                                                                                                                                                                              |                                     |                                                                                                                                                          |
|---------------------|-----------------------------------------------------------------------|------------------|---------------------------------------------------------------------------------------------------|------------------------------------------------------------------------------------------------|----------|----------------------------------------------|------------------------------------------------------------------------------------------------------------------------------------------------------------------------------------------------------------------------------------------------------------------------------------------------------------------------------------------------------------------------------------------------------------------------------------------------------------------------------------------------------------------------------------------------------------------------------------------------------------------------------------------------------------------------------|-------------------------------------|----------------------------------------------------------------------------------------------------------------------------------------------------------|
| Dong 2019           | Prospective observational cohort. China                               | AS etanercept    | To investigate the effective serum level of etanercept in patients with AS                        | 60 pts, 54/60 male, age 29 years, disease duration 4 years                                     | 24 weeks | BASDAI, ASDAS CRP/ESR, drug levels           | cut-off values of effective etanercept levels when patients achieved ASDAS-CRP < 2.1 at each interval by ROC curve: values at weeks 4, 12, and 24 were 2.32, 2.12, and 2.36 µg/mL, respectively, while the sensitivity and specificity values were 53.7% and 94.4%, 60.8% and 86.7%, and 59.2% and 85.7%, respectively<br>In addition, the area under the curve (AUC) values were 0.758 (p = 0.002, 95% confidence interval (CI), 0.635–0.881), 0.709 (p = 0.005, 95% CI, 0.571–0.846), and 0.723 (p = 0.008, 95% CI, 0.503–0.916) at weeks 4, 12, and 24, respectively                                                                                                      | Quality in Prognosis Studies Tool   | 1.Study participation: moderate<br>2.Attrition: high<br>3.Prognostic factor: moderate<br>4.Outcome: low<br>5.Confounding: high<br>6.Statistics: moderate |
| <b>GOLIMUMAB</b>    |                                                                       |                  |                                                                                                   |                                                                                                |          |                                              |                                                                                                                                                                                                                                                                                                                                                                                                                                                                                                                                                                                                                                                                              |                                     |                                                                                                                                                          |
| Martinez-Feito 2018 | Prospective observational cohort, multicenter, Spain, the Netherlands | axSpA, golimumab | Association between GLM levels and clinical response, determining the optimal concentration range | 49 pts, 48 years, 73% men, disease duration 10.5 years, HLAB27 69%, ASDAS 3.5, monotherapy 37% | 52 weeks | Clinical response: ASDAS, ΔASDAS, GLM levels | A concentration effect curve plotting the ΔASDAS at week 52 and golimumab level showed that concentrations between 0.7 and 1.4 mg/l appeared sufficient to reach the therapeutic aim (ΔASDAS ≥1.1) among patients with levels <0.7 mg/l only one achieved major clinical improvement (ΔASDAS ≥1.1). and 59% and 62.5% of patients in the 0.7-1.5-4 and >1.4 mg/l group, respectively, achieved this treatment goal (p>0.01)<br><br>Of patients with levels <0.7mg/l, 37% had ASDAS<2.1 and 63% had ASDAS≥2.1<br>Of patients with levels 0.7 – 1.4 mg/l, 88% had ASDAS<2.1 and 12% had ASDAS≥2.1<br>Of patients with levels >1.4mg/l, 75% had ASDAS<2.1 and 25% had ASDAS≥2.1 | Newcastle-Ottawa for cohort studies | Sum score: ***, **, **<br>Selection: ***<br>Comparability: **<br>Outcome: **                                                                             |

**Peripheral spondyloarthritis including psoriatic arthritis + TNF inhibitors**

| Study             | Study design                                                  | Population      | Scope/Intervention                                              | Study population                                                                        | Follow-up | Outcome measures  | Results                                                                                                                                                                                                                                                                                                  | Tool used for RoB assessment      | Risk of Bias                                                                                                                                   |
|-------------------|---------------------------------------------------------------|-----------------|-----------------------------------------------------------------|-----------------------------------------------------------------------------------------|-----------|-------------------|----------------------------------------------------------------------------------------------------------------------------------------------------------------------------------------------------------------------------------------------------------------------------------------------------------|-----------------------------------|------------------------------------------------------------------------------------------------------------------------------------------------|
| <b>ADALIMUMAB</b> |                                                               |                 |                                                                 |                                                                                         |           |                   |                                                                                                                                                                                                                                                                                                          |                                   |                                                                                                                                                |
| Vogelzang 2014    | Prospective observational cohort, monocenter, the Netherlands | PsA, adalimumab | Association between adalimumab drug levels and disease activity | 103 pts, male 53%, age 50 years, MTX 78%, disease duration 6 years, DAS28 4.0, PASI 0.6 | 52 weeks  | Drug level, DAS28 | Concentrations of approximately 1.0 mg/L already show reasonable efficacy. Adalimumab concentrations between 5–8 mg/L appear optimal. In 48 (47%) patients, adalimumab concentrations exceeded 8 mg/L. Furthermore, 36 (35%) patients had adalimumab concentrations below 5 mg/L.<br><br>(no statistics) | Quality in Prognosis Studies Tool | 1.Study participation: high<br>2.Attrition: high<br>3.Prognostic factor: low<br>4.Outcome: low<br>5.Confounding: moderate<br>6.Statistics: low |

|           |                                                                   |               |                                                                                                                                                                                    |                                                                                                                           |           |                                                                          |                                                                                                                                                                                                                                                                                                                                                                                                                                                                                                                                                           |                                   |                                                                                                                                                 |
|-----------|-------------------------------------------------------------------|---------------|------------------------------------------------------------------------------------------------------------------------------------------------------------------------------------|---------------------------------------------------------------------------------------------------------------------------|-----------|--------------------------------------------------------------------------|-----------------------------------------------------------------------------------------------------------------------------------------------------------------------------------------------------------------------------------------------------------------------------------------------------------------------------------------------------------------------------------------------------------------------------------------------------------------------------------------------------------------------------------------------------------|-----------------------------------|-------------------------------------------------------------------------------------------------------------------------------------------------|
| Jani 2020 | Prospective observational cohort study, multicenter (UK), OUTPASS | PsA, ETN, ADA | 1- whether the presence of ADAb/drug levels predicts treatment response 2- identify a drug level threshold for optimal therapeutic response 3- factors associated with drug levels | ADA 97 pts, ETN 56 pts, age 51 yrs, BMI 28.9, female gender 46%, disease duration 5 yrs, DAS28: 4.9, CRP 7.5, MTX use 25% | 12 months | Adalimumab and etanercept concentrations, disease activity (DAS28 (crp)) | There was no significant association between ETN drug levels and $\Delta$ DAS28 over 12 months ( $\beta$ -0.039, 95% CI -0.31 to 0.23; $p$ = 0.77).<br><br>ADA concentrations between 4–8 $\mu$ g/ml were associated with an optimal treatment response at 6 months using concentration-effect curves. Of samples with ADA levels measured in the study, distribution of levels was as follows: 19.6% ( $n$ = 19) < 4 $\mu$ g/ml; 35.1% ( $n$ = 34) 4–8 $\mu$ g/ml; 16.5% ( $n$ = 16) > 8 to < 11 $\mu$ g/ml; and 28.9% ( $n$ = 28) $\geq$ 11 $\mu$ g/ml. | Quality in Prognosis Studies Tool | 1.Study participation: moderate<br>2.Attrition: high<br>3.Prognostic factor: high<br>4.Outcome: low<br>5.Confounding: high<br>6.Statistics: low |
|-----------|-------------------------------------------------------------------|---------------|------------------------------------------------------------------------------------------------------------------------------------------------------------------------------------|---------------------------------------------------------------------------------------------------------------------------|-----------|--------------------------------------------------------------------------|-----------------------------------------------------------------------------------------------------------------------------------------------------------------------------------------------------------------------------------------------------------------------------------------------------------------------------------------------------------------------------------------------------------------------------------------------------------------------------------------------------------------------------------------------------------|-----------------------------------|-------------------------------------------------------------------------------------------------------------------------------------------------|

**Combination of diseases and TNF inhibitors**

| Study      | Study design                                                      | Population                 | Scope/Intervention                                                  | Study population                                                                                                                                                                                                                                                                                    | Follow-up | Outcome measures                                                                                         | Results                                                                                                                                                                                                                                                                                                                                                                                                                                                                                                                                                                                                                                                                                                                                                                                                                                                                | Tool used for RoB assessment      | Risk of Bias                                                                                                                              |
|------------|-------------------------------------------------------------------|----------------------------|---------------------------------------------------------------------|-----------------------------------------------------------------------------------------------------------------------------------------------------------------------------------------------------------------------------------------------------------------------------------------------------|-----------|----------------------------------------------------------------------------------------------------------|------------------------------------------------------------------------------------------------------------------------------------------------------------------------------------------------------------------------------------------------------------------------------------------------------------------------------------------------------------------------------------------------------------------------------------------------------------------------------------------------------------------------------------------------------------------------------------------------------------------------------------------------------------------------------------------------------------------------------------------------------------------------------------------------------------------------------------------------------------------------|-----------------------------------|-------------------------------------------------------------------------------------------------------------------------------------------|
| Gehin 2019 | Longitudinal observational cohort (NORDMARD), multicenter, Norway | RA, SpA, PsA, certolizumab | Association between serum levels, antibodies and treatment response | 116 SpA, 91 RA and 61 PsA.<br><br>SpA: age 42 years, female 47%, disease duration 2,6 years, ASDAS crp 2.6, DMARDs 19%.<br><br>RA age 54 years, female 79%, disease duration 10 years, DAS28 4.0, DMARDs 74%.<br><br>PsA age 50 years, female 66%, disease duration 6.6 years, DAS28 3.9 DMARDs 67% | 6 months  | Clinical response (ASDAS-CRP, improvement $\geq$ 1.1, DAS28, EULAR good/moderate, improvement $\geq$ 0.6 | Patients with certolizumab levels of 20-39.9 mg/l had the largest mean improvement in disease activity from baseline to 3 months for all diseases.<br>- for axSpA 53% clinically important improvement of ASDAS vs. 18% and 37% for <20 mg/L and $\geq$ 40 mg/L, resp.<br>- for PsA 77% $\geq$ 0.6 improvement of DAS28 vs. 47% and 77% for <20 mg/L and $\geq$ 40 mg/L, resp.<br>for RA 74% $\geq$ 0.6 improvement of DAS28 vs. 44% and 55% for <20 mg/L and $\geq$ 40 mg/L, resp.<br><br>Having a serum CZP level $\geq$ 20 mg/L was associated with response at 3 and 6 months for all three diagnoses combined (OR 2.3 (95% CI 1.2–4.5, $p$ = 0.01), OR 1.9 (95% CI 1.0–3.5, $p$ = 0.05), respectively). However, CZP levels $\geq$ 40 mg/L were not associated with any additional benefit, and response rates were, on the contrary, lower across all diagnoses. | Quality in Prognosis Studies Tool | 1.Study participation: low<br>2.Attrition: high<br>3.Prognostic factor: low<br>4.Outcome: low<br>5.Confounding: high<br>6.Statistics: low |

|                            |                                                                                              |                               |                                                                  |                                     |          |                                                                                  |                                                                                                                                                                                                                                                                                                                                                                                                                                                                                                                                                                               |                                            |                                                                                        |
|----------------------------|----------------------------------------------------------------------------------------------|-------------------------------|------------------------------------------------------------------|-------------------------------------|----------|----------------------------------------------------------------------------------|-------------------------------------------------------------------------------------------------------------------------------------------------------------------------------------------------------------------------------------------------------------------------------------------------------------------------------------------------------------------------------------------------------------------------------------------------------------------------------------------------------------------------------------------------------------------------------|--------------------------------------------|----------------------------------------------------------------------------------------|
| Gehin<br>FRI0536<br>(2020) | EULAR<br>abstract<br>2020<br><br>Observational study as<br>part of<br>NOR-<br>DMARD<br>study | RA, axial<br>SpA, PsA,<br>GLM | To identify the<br>therapeutic target<br>concentration of<br>GLM | 91 pts (RA:20,<br>PsA:30, AxSpA:41) | 3 months | Random GLM<br>levels, treatment<br>response (EULAR<br>response, ASDAS,<br>DAPSA) | The proportions of responders after 3 months among patients with golimumab concentration <1.0, 1.0-3.9 and ≥4.0 mg/L, were 19%, 49% and 74%, respectively. The likelihood of response after 3 months of treatment was significantly higher among patients with serum golimumab concentration ≥1.0 mg/L compared to those with golimumab concentration <1.0 mg/L (OR 5.8 (95% CI 1.7-19.7), p=0.005). A higher rate of treatment discontinuation in patients with serum golimumab concentration <1.0 mg/L compared to ≥1.0 mg/L was shown (HR 3.6 (95% CI 1.9-6.9), P <0.001). | Newcastle-<br>Ottawa for cohort<br>studies | Sum score: **, **, **<br><br>Selection: **<br><br>Comparability: **<br><br>Outcome: ** |
|----------------------------|----------------------------------------------------------------------------------------------|-------------------------------|------------------------------------------------------------------|-------------------------------------|----------|----------------------------------------------------------------------------------|-------------------------------------------------------------------------------------------------------------------------------------------------------------------------------------------------------------------------------------------------------------------------------------------------------------------------------------------------------------------------------------------------------------------------------------------------------------------------------------------------------------------------------------------------------------------------------|--------------------------------------------|----------------------------------------------------------------------------------------|

**PTC-5:** Routine use of proactive TDM is not recommended in the management of inflammatory arthritis.

| Study                                         | Study design                    | Population                                            | Scope/Intervention                                                                                                                                                                                                                                                                                                  | Study population                                                  | Follow-up                    | Outcome measures                        | Results                                                                                                                                                                                                                                                                                                                                                                                                                                                                                                                                                                                                        | Tool used for RoB assessment        | Risk of Bias                                                                                                                                                              |
|-----------------------------------------------|---------------------------------|-------------------------------------------------------|---------------------------------------------------------------------------------------------------------------------------------------------------------------------------------------------------------------------------------------------------------------------------------------------------------------------|-------------------------------------------------------------------|------------------------------|-----------------------------------------|----------------------------------------------------------------------------------------------------------------------------------------------------------------------------------------------------------------------------------------------------------------------------------------------------------------------------------------------------------------------------------------------------------------------------------------------------------------------------------------------------------------------------------------------------------------------------------------------------------------|-------------------------------------|---------------------------------------------------------------------------------------------------------------------------------------------------------------------------|
| Syversen S. et al, 2020<br><br>EULAR abstract | Randomised controlled trial     | Pts starting IFX with RA, PsA, SpA, UC, CD, Psoriasis | Pts starting IFX therapy were randomly assigned to administration of IFX according to a treatment strategy based on TDM (TDM arm) or to standard administration of INX without TDM (control arm). In the TDM arm, the dose and interval were adjusted according to IFX trough levels to reach the therapeutic range | 398 patients (RA 80, PsA 42, SpA 117, UC 80, CD 57, Psoriasis 22) | 30 weeks                     | Primary endpoint: Remission at week 30. | For all diagnoses, remission at week 30 was reached in 100 (53%) and 106 (54%) of the patients in the TDM and control arm, respectively (adjusted difference, 1.5%; 95% CI, -8.2 to 11.1, p=0.78)<br><br>Remission rates TDM group vs. Control group, by disease:<br>RA: 58% vs. 50%, difference -8.3% (95% CI -30.4-13.8)<br>PsA: 28% vs. 57%, difference 29.4% (95% CI -0.2-59.0)<br>SpA: 40% vs. 37%, difference -3.5% (95% CI -21.4-14.4)<br><br>-Reviewer conclusion: The study did not demonstrate utility of TDM as a general strategy when starting IFX, (but less infusion reactions in the TDM arm). | Cochrane RoB2 for RCT               | Overall: Some concerns<br><br>Randomisation: Low<br>Intervention: High<br>Missing outcome data: Unclear<br>Outcome measurement: Some concerns<br>Selective reporting: Low |
| Méric J-C. et al, 2011                        | Prospective observational study | SpA pts, routinely treated with IFX                   | The preliminary therapeutic decision (based on disease activity) was re-evaluated, based on an algorithm including both disease activity and IFX DL and applied at the next infusion.                                                                                                                               | 32 pts<br>% male: 50<br>Median age: 48 years                      | 3 visits (V2-V4) (16 weeks?) | BASDAI improvement                      | -The preliminary therapeutic decision (based on disease activity alone) was modified (based on IFX DL) in 10 pts (31%).<br><br>- In the 4 patients whose measurement of IFX DL modified the therapeutic decision to an increase in IFX dosage, adaptation of the IFX dose based on DL led to improvement in BASDAI in only 2 out of 4 patients, despite increased DL in all 4.<br><br>-Reviewer conclusion: The study did not demonstrate utility of TDM. Small study without control group.                                                                                                                   | Newcastle-Ottawa for cohort studies | Sum score: **, **<br>Selection: **<br>Comparability: **<br>Outcome: **                                                                                                    |

**PTC-6:** Reactive TDM could be considered in the management of inflammatory arthritis.

Please see evidence tables for PTC 7, 8, 9, 10 and 11, in which evidence for utility of TDM in particular clinical situations are provided.

**PTC-7:** Measurement of biopharmaceutical blood concentrations up to 3 months after commencement of treatment could be considered to predict future efficacy.

| Study                               | Study design                 | Population                 | Scope/Intervention                                                                                                                 | Study population                         | Follow-up | Outcome measures                                                  | Results                                                                                                                                                                                                                                                                                                                                                                                                                                                                                                                                                                                                                                                                                                                                                               | Tool used for RoB assessment              | Risk of Bias                                                                                                                                                |
|-------------------------------------|------------------------------|----------------------------|------------------------------------------------------------------------------------------------------------------------------------|------------------------------------------|-----------|-------------------------------------------------------------------|-----------------------------------------------------------------------------------------------------------------------------------------------------------------------------------------------------------------------------------------------------------------------------------------------------------------------------------------------------------------------------------------------------------------------------------------------------------------------------------------------------------------------------------------------------------------------------------------------------------------------------------------------------------------------------------------------------------------------------------------------------------------------|-------------------------------------------|-------------------------------------------------------------------------------------------------------------------------------------------------------------|
| <b>Infliximab</b>                   |                              |                            |                                                                                                                                    |                                          |           |                                                                   |                                                                                                                                                                                                                                                                                                                                                                                                                                                                                                                                                                                                                                                                                                                                                                       |                                           |                                                                                                                                                             |
| Martinez-Feito A. et al, EULAR 2019 | Prospective observational    | axSpA pts treated with IFX | Association between W14 IFX DL and W24 response evaluated.<br>High or low IFX DL defined as above or below median measured IFX DL. | 81 pts                                   | 24 weeks  | -ASDAS clinical improvement<br>-ΔASDAS                            | Predictive value (OR) for W24 response:<br>-High W14 IFX DL: OR: 3.6; CI 95%: 1.3-10.4 (multivariable model).<br>-W14 s-IFX ≥ 6.7 µg/mL and baseline disease activity score ≥ 3.5, combined, predicted higher ΔASDAS at W24: OR 16, 95%CI: 3.6-71.7 (adjustments NR).<br>- W14 s-IFX ≥ 6.7 µg/mL and ADAb positivity combined, predicted W24 response (by ROC-curve analyses) with a sens. 87.5%, spec. 69.6%, PPV of 75% and NPV of 84.2% (AUC NR).<br>Reviewer conclusion: W14 s-IFX predicted W24 response                                                                                                                                                                                                                                                         | Quality in Prognosis Studies Tool (QUIPS) | 1.Study participation: High<br>2.Attrition: High<br>3.Prognostic factor: Moderate<br>4.Outcome: Low<br>5.Confounding: Moderate<br>6.Statistics: Low         |
| Siljehult F. et al, 2018            | Retrospective observational  | RA pts treated with IFX    | Evaluated s-IFX and ADAb at 14 weeks, in relation to response after 52 weeks                                                       | 94 pts (72 completed 52 weeks follow-up) | 52 weeks  | -EULAR good/moderate                                              | -Predictive value of W14 IFX DL ≥ 4.66 µg/mL for W52 response: AUC 0.69, spec. 91.3% sens. 39.3%.<br>-16/18 (88.9%) of W14 good responders with IFX DL > 0.5 µg/mL were still good to moderate responders at W52.<br>Reviewer conclusion: W14 s-IFX predicts response after 52 weeks (AUC 0.69 (not reported 95%CI or p))                                                                                                                                                                                                                                                                                                                                                                                                                                             | Quality in Prognosis Studies Tool (QUIPS) | 1.Study participation: Moderate<br>2.Attrition: Moderate<br>3.Prognostic factor: Moderate<br>4.Outcome: Low<br>5.Confounding: Moderate<br>6.Statistics: Low |
| Jurado T. et al, 2017               | Restrospective observational | RA pts treated with IFX    | Assess whether IFX trough levels in the induction phase are associated with clinical outcomes at week 54                           | 66 pts<br>Mean age: 56 y<br>% male: 14   | 54 weeks  | -DAS28 score, LDA, remission<br>-EULAR response<br>-Drug survival | W54 DAS28 score in pts stratified by W6 IFX DL:<br>-Pts with W6 IFX DL > 4.4 µg/ml: 3.68±1.26<br>-Pts with W6 IFX DL < 4.4 µg/ml: 4.75±1.27<br>-Difference in W54 DAS28 was statistically significant, p=0.01.<br><br>Proportion of pts with W54 DAS28 LDA or remission stratified by W6 IFX DL:<br>-Pts with W6 IFX DL > 4.4 µg/ml: 20/45 (44%)<br>-Pts with W6 IFX DL < 4.4 µg/ml: 3/19 (16%);<br>-Difference in proportion with W54 DAS28 LDA or remission was statistically significant, p=0.02<br><br>Proportion of W54 EULAR responders stratified by W6 IFX DL:<br>Pts with W6 IFX DL > 4.4 µg/ml: 33/45 (73%)<br>Pts with W6 IFX DL < 4.4 µg/ml: 10/19 (53%);<br>- Difference in proportion with W54 EULAR response was not statistically significant, p=0.08 | Quality in Prognosis Studies Tool (QUIPS) | 1.Study participation: Moderate<br>2.Attrition: Moderate<br>3.Prognostic factor: Moderate<br>4.Outcome: Low<br>5.Confounding: Low<br>6.Statistics: Low      |

|                             |                           |                                         |                                                                                                                                                                                               |                                  |          |                                                                                                   |                                                                                                                                                                                                                                                                                                                                                                                                                                                                                                                                                                                                                                                                                                                                                                                                         |                                           |                                                                                                                                                                                                                                        |
|-----------------------------|---------------------------|-----------------------------------------|-----------------------------------------------------------------------------------------------------------------------------------------------------------------------------------------------|----------------------------------|----------|---------------------------------------------------------------------------------------------------|---------------------------------------------------------------------------------------------------------------------------------------------------------------------------------------------------------------------------------------------------------------------------------------------------------------------------------------------------------------------------------------------------------------------------------------------------------------------------------------------------------------------------------------------------------------------------------------------------------------------------------------------------------------------------------------------------------------------------------------------------------------------------------------------------------|-------------------------------------------|----------------------------------------------------------------------------------------------------------------------------------------------------------------------------------------------------------------------------------------|
|                             |                           |                                         |                                                                                                                                                                                               |                                  |          |                                                                                                   | Reviewer conclusion: W6 IFX DL was associated with response at W54                                                                                                                                                                                                                                                                                                                                                                                                                                                                                                                                                                                                                                                                                                                                      |                                           |                                                                                                                                                                                                                                        |
| Van den Bemt B. et al, 2013 | Prospective observational | RA pts starting IFX                     | Assessed the added predictive value of combining IFX DL with disease activity and at 6 weeks for achieving EULAR good response after 6 months. IFX trough conc. measured at 2, 6 and 26 weeks | 57 pts, Mean age; 57y % male: 37 | 6 months | -EULAR good response                                                                              | <p>The value of adding IFX DL &gt;2.5 mg/L, to disease activity (DAS28 &lt;4.2) at 6 weeks as predictor for response after 6 months, increased the spec. from 49% to 54% without changing the sensitivity (100%),(PPV: 45%, NPV:100%, Youden index 0.54)(compared to disease activity alone)</p> <p>Proportion of responders after 6 months stratified by presence of ADA (no statistics):</p> <p>0/3 of those who were ADA pos at 6 weeks</p> <p>1/9 of those who were ADA pos at 14 weeks</p> <p>Reviewer conclusion: W6 IFX DL, combined with disease activity, slightly increased the predictive value for response after 6 months, compared to disease activity alone.</p>                                                                                                                         | Quality in Prognosis Studies Tool (QUIPS) | <ol style="list-style-type: none"> <li>1.Study participation: Moderate</li> <li>2.Attrition: Moderate</li> <li>3.Prognostic factor: Low</li> <li>4.Outcome: Low</li> <li>5.Confounding: High</li> <li>6.Statistics: Low</li> </ol>     |
| <i>Adalimumab</i>           |                           |                                         |                                                                                                                                                                                               |                                  |          |                                                                                                   |                                                                                                                                                                                                                                                                                                                                                                                                                                                                                                                                                                                                                                                                                                                                                                                                         |                                           |                                                                                                                                                                                                                                        |
| Ding et al. 2020            | Prospective observational | AS pts with active disease starting ADA | ADA trough was measured week 2,4, 8, 12                                                                                                                                                       | 31 pts                           | 12 weeks | Response by week 12, def: $\Delta$ ASDAS $\geq$ 2.0 or ASDAS < 2.1 with $\Delta$ ASDAS $\geq$ 1.1 | <p>W12 nonresponders had significantly lower W4 and W2 ADA DL than W12 responders;</p> <p>W4: median 2.60 <math>\mu</math>g/mL IQR 0.30–3.55 vs. 7.07 <math>\mu</math>g/mL IQR 5.42–7.71, respectively, <math>P &lt; 0.0001</math>;</p> <p>W2: 2.73 <math>\mu</math>g/mL IQR 0.66–3.22 vs. 4.71 <math>\mu</math>g/mL IQR 3.14–4.95, respectively, <math>P = 0.036</math>.</p> <p>W4 or W2 ADA DL below 4.28 <math>\mu</math>g/mL or 3.37 <math>\mu</math>g/mL were significantly associated with W12 non-response,</p> <p>W4: AUC = 0.89, <math>P = 0.0003</math>, sens. 83.3%, spec. 94.7%;</p> <p>W2: AUC = 0.88, <math>P = 0.034</math>, sens. 100%, spec. 70.0%;</p> <p>W4 ADA ADA levels above 5.31 had a 66.7% sens. and 94.7% spec. for W12 nonresponse (AUC = 0.81, <math>P = 0.004</math>)</p> | Quality in Prognosis Studies Tool (QUIPS) | <ol style="list-style-type: none"> <li>1.Study participation: Moderate</li> <li>2.Attrition: Low</li> <li>3.Prognostic factor: Moderate</li> <li>4.Outcome: Low</li> <li>5.Confounding: Moderate</li> <li>6.Statistics: Low</li> </ol> |

|                     |                           |                         |                                                                                                                               |                                                 |           |                     |                                                                                                                                                                                                                                                                                                                                                                                              |                                           |                                                                                                                                                   |
|---------------------|---------------------------|-------------------------|-------------------------------------------------------------------------------------------------------------------------------|-------------------------------------------------|-----------|---------------------|----------------------------------------------------------------------------------------------------------------------------------------------------------------------------------------------------------------------------------------------------------------------------------------------------------------------------------------------------------------------------------------------|-------------------------------------------|---------------------------------------------------------------------------------------------------------------------------------------------------|
|                     |                           |                         |                                                                                                                               |                                                 |           |                     | Reviewer conclusion: The study showed predictive value of W2 and W4 ADA DL and presence of ADAAb for W12 responses. Small study.                                                                                                                                                                                                                                                             |                                           |                                                                                                                                                   |
| Jani M. et al, 2015 | Prospective observational | RA pts treated with ADA | The association between ADAAb and TNFi non-trough levels at 3 months and the treatment response after 12 months was evaluated | ADA : 160 pts<br>Mean age: 57 y<br>% male: 24,5 | 12 months | -EULAR non-response | Predictive value for EULAR non-response at 12 months:<br>-ADA DL <5 µg/ml at 3 months: AUC 0.66 (95% CI 0.55- 0.77)<br>-ADA ADAAb at 3 months: AUC 0.68 (95% CI 0.54-0.81)<br>-Predictive value of both ADA DL <5 µg/ml and anti-ADA-Ab at 3 months, combined,: AUC of 0.71 (95% CI 0.57-0.85)<br><br>Reviewer conclusion: Low ADA DL and ADAAb at 3 months predicted 12 month non-response. | Quality in Prognosis Studies Tool (QUIPS) | 1.Study participation: Low<br>2.Attrition: Moderate<br>3.Prognostic factor: Moderate<br>4.Outcome: Low<br>5.Confounding: Low<br>6.Statistics: Low |
| <b>Etanercept</b>   |                           |                         |                                                                                                                               |                                                 |           |                     |                                                                                                                                                                                                                                                                                                                                                                                              |                                           |                                                                                                                                                   |
| Jani M. et al, 2015 | Prospective observational | RA pts treated with ETN | The association between ADAAb and TNFi non-trough levels at 3 months and the treatment response after 12 months was evaluated | ETN: 171 pts<br>Mean age: 57 y<br>% male: 24,5  | 12 months | -EULAR non-response | Predictive value for EULAR non-response at 12 months:<br>-ETN DL <5 µg/ml at 3 months: AUC of 0.51 (95% CI 0.41, 0.61)<br>-ETN DL <3.23 µg/ml at 3 months: AUC of 0.58 (95% CI 0.46, 0.70).<br><br>Reviewer conclusion: Low serum ETN was not predictive for 12 month response                                                                                                               | Quality in Prognosis Studies Tool (QUIPS) | 1.Study participation: Low<br>2.Attrition: Moderate<br>3.Prognostic factor: Moderate<br>4.Outcome: Low<br>5.Confounding: Low<br>6.Statistics: Low |

|                       |                           |                                        |                                                                                           |                                                                                                                       |          |                                                                                      |                                                                                                                                                                                                                                                                                                                                                                                                                                                                                                                           |                                           |                                                                                                                                                |
|-----------------------|---------------------------|----------------------------------------|-------------------------------------------------------------------------------------------|-----------------------------------------------------------------------------------------------------------------------|----------|--------------------------------------------------------------------------------------|---------------------------------------------------------------------------------------------------------------------------------------------------------------------------------------------------------------------------------------------------------------------------------------------------------------------------------------------------------------------------------------------------------------------------------------------------------------------------------------------------------------------------|-------------------------------------------|------------------------------------------------------------------------------------------------------------------------------------------------|
| Daien Cl. et al, 2012 | Prospective observational | RA pts starting ETN                    | ETN DL and anti-ETN ADAb were measured at baseline and after 3 and 6 months of treatment. | 19 women                                                                                                              | 6 months | -EULAR good/moderate response<br>-ΔDAS28                                             | Median ETN DL at 3 months in pts stratified by response after 6 months<br>-Non-responders: 1.75 µg/ml, IQR 0–3.6,<br>-Responders: 3.70 µg/ml, IQR 1.0–6.7,<br>-The difference in median ETN DL was statistically significant, p = 0.03<br><br>3-month ETN DL correlated significantly with ΔDAS28 at 6 months (r = -0.62, p = 0.006).<br>ETN DL ≥ 3.1 µg/ml at 3 months predicted 6-month response with sens. 87% and spec. of 67% (AUC NR).<br>Reviewer conclusion: 3 months ETN DL was associated with 6 month response | Quality in Prognosis Studies Tool (QUIPS) | 1.Study participation: High<br>2.Attrition: Low<br>3.Prognostic factor: Moderate<br>4.Outcome: Low<br>5.Confounding: High<br>6.Statistics: Low |
| <i>Certolizumab</i>   |                           |                                        |                                                                                           |                                                                                                                       |          |                                                                                      |                                                                                                                                                                                                                                                                                                                                                                                                                                                                                                                           |                                           |                                                                                                                                                |
| Gehin J. et al, 2019  | Prospective observational | axSpA, RA and PsA pts treated with CZP | Associations between 3 months non-trough CZP DL and response after 6 months               | 268 pts, axSpA: 116<br>RA: 91<br>PsA: 61<br>Mean age: axSpA 42 y, RA 54 y, PsA 50 y<br>%male: axSpA 53, RA 22, PsA 34 | 6 months | -ASDAS clinical improvement (axSpA)<br>-EULAR good/moderate (RA)<br>-DAS28 0.6 (PsA) | -3-month CZP DL ≥20 mg/L associated with response after 6 months: OR 1.9 (95% CI 1.0-3.5, P = 0.05)(multivariable logistic regression)<br><br>Reviewer conclusion: 3 month CZP DL associated with response after 6 months                                                                                                                                                                                                                                                                                                 | Quality in Prognosis Studies Tool         | 1.Study participation: low<br>2.Attrition: high<br>3.Prognostic factor: low<br>4.Outcome: low<br>5.Confounding: high<br>6.Statistics: low      |

**PTC-8:** Measurement of biopharmaceutical blood concentrations could be considered to identify those with high biopharmaceutical blood concentrations in whom tapering may be indicated.

| Study                             | Study design              | Population                             | Scope/Intervention                                                                                                                                                                                                                                                                                                        | Study population                        | Follow-up | Outcome measures                                                                   | Results                                                                                                                                                                                                                                                                                                                                                                                                                                                           | Tool used for RoB assessment              | Risk of Bias                                                                                                                                                  |
|-----------------------------------|---------------------------|----------------------------------------|---------------------------------------------------------------------------------------------------------------------------------------------------------------------------------------------------------------------------------------------------------------------------------------------------------------------------|-----------------------------------------|-----------|------------------------------------------------------------------------------------|-------------------------------------------------------------------------------------------------------------------------------------------------------------------------------------------------------------------------------------------------------------------------------------------------------------------------------------------------------------------------------------------------------------------------------------------------------------------|-------------------------------------------|---------------------------------------------------------------------------------------------------------------------------------------------------------------|
| <i>Rheumatoid arthritis</i>       |                           |                                        |                                                                                                                                                                                                                                                                                                                           |                                         |           |                                                                                    |                                                                                                                                                                                                                                                                                                                                                                                                                                                                   |                                           |                                                                                                                                                               |
| Bastida et al. 2020               | PK/PD simulation study    | RA virtual population treated with TCZ | Four tapering strategies were simulated on a virtual population;<br>1. label-dosing<br>2. mild empirical dose-tapering<br>3. intense empirical dose-tapering<br>4. TDM-guided dose tapering<br><br>PK model used to predict individual TCZ DL. The predicted TCZ DLs were related to response by a population PKPD model. | Virtual population of 5000 individuals  | 12 months | Sustained remission/LDA                                                            | -Proportion of simulated pts in remission/LDA after 1 year:<br>Mild empirical group: 80.3%<br>TDM-guided: 78.2%<br>Intense empirical: 69.0%<br><br>-1-year flare rates:<br>Mild empirical group: 6.5%<br>TDM-guided: 10.6%<br>Intense empirical: 24.8%<br><br>Reviewer conclusion: The study did not demonstrate additional value of the TDM-guided vs. the mild empirical tapering strategy with regard to outcome.                                              | Quality in Prognosis Studies Tool (QUIPS) | 1. Study participation: High<br>2. Attrition: Unclear<br>3. Prognostic factor: Moderate<br>4. Outcome: High<br>5. Confounding: Moderate<br>6. Statistics: Low |
| Lamers-Karnebeek FBG. et al, 2019 | Post hoc/ substudy of RCT | RA pts with LDA who discontinued ADA   | Pts in LDA on stable treatment, who were randomised to discontinue ADA were included in post hoc study. Retrospective assessment of trough ADA DL and ADAb as predictors of flare.                                                                                                                                        | 210 pts<br>% male: 31<br>Mean age: 59 y | 52 weeks  | -Flare (increase of >0.6 in DAS28-ESR from baseline, with current DAS28-ESR > 3.2) | -Predictive value of flare for ADA DL: AUC 0.50, 95% CI 0.42-0.58, P = 0.92.<br>-HR for flare in pts with ADA DL $\geq$ 5 vs <5 $\mu\text{g/ml}$ : 0.93, 95% CI: 0.63-1.36 (adjustments not specified in manuscript).<br>-2 out of 4 pts with high ADAb experienced a flare.<br>-10 out of 21 pts with ADA DL <0.1 $\mu\text{g/mL}$ experienced a flare after a median of 24 weeks.<br>Reviewer conclusion: The study did not demonstrate predictive value of TDM | Quality in Prognosis Studies Tool (QUIPS) | 1. Study participation: Low<br>2. Attrition: Low<br>3. Prognostic factor: High<br>4. Outcome: Moderate<br>5. Confounding: High<br>6. Statistics: Low          |

|                                   |                                                                                                                                       |                                              |                                                                                                                                                                                             |                                                                                                                                                  |                                       |                                                                                                                                  |                                                                                                                                                                                                                                                                                                                                                                                                                                                                                                                                                                                                                                                                                                                                                                                                                                                                                                                                                                                                     |                                           |                                                                                                                                                                       |
|-----------------------------------|---------------------------------------------------------------------------------------------------------------------------------------|----------------------------------------------|---------------------------------------------------------------------------------------------------------------------------------------------------------------------------------------------|--------------------------------------------------------------------------------------------------------------------------------------------------|---------------------------------------|----------------------------------------------------------------------------------------------------------------------------------|-----------------------------------------------------------------------------------------------------------------------------------------------------------------------------------------------------------------------------------------------------------------------------------------------------------------------------------------------------------------------------------------------------------------------------------------------------------------------------------------------------------------------------------------------------------------------------------------------------------------------------------------------------------------------------------------------------------------------------------------------------------------------------------------------------------------------------------------------------------------------------------------------------------------------------------------------------------------------------------------------------|-------------------------------------------|-----------------------------------------------------------------------------------------------------------------------------------------------------------------------|
| L'Ami M. et al, 2018              | Randomised, open-label, non-inferiority trial                                                                                         | RA pts treated with ADA                      | Pts with ADL >8 µg/mL randomised (1:1) to prolongation group (40 mg once every 3 weeks) or continuation group (standard interval)                                                           | 55 pts<br>% male: 6<br>Mean age: 60 y                                                                                                            | 28 weeks                              | - ΔDAS28-ESR                                                                                                                     | Mean ΔDAS28 after 28 weeks:<br>-Prolongation group: -0.14±0.61.<br>-Continuation group: 0.30±0.52<br>-Mean difference: 0.44 (95% CI 0.12 to 0.76, p=0.01) (in favour of prolongation group).<br>Reviewer conclusion: The study demonstrated that tapering was safe among RA pts with ADA DL >8 µg/mL. (The study did not include ctrl. Group with lower DLs)                                                                                                                                                                                                                                                                                                                                                                                                                                                                                                                                                                                                                                        | Cochrane RoB2 for RCT                     | Overall: Some concerns<br><br>Randomisation: Low<br>Intervention: High<br>Missing outcome data: Low<br>Outcome measurement: Some concerns<br>Selective reporting: Low |
| Bouman C. et al, 2017             | Post hoc analyses of data for RA pts in two different studies included; 1. An open-label RCT and 2. A prospective observational study | RA pts with LDA treated with ADA, ETN, IFX   | Pts in LDA, were tapered until discontinuation or flare. Non-trough DL for ADA and ETN and trough for IFX, were measured before dose reduction. Tapering was performed independently of DL. | 169 pts<br>ADA: 42<br>ETN: 76<br>IFX: 51<br><br>% male:<br>ADA: 36<br>ETN: 39<br>IFX: 63<br><br>Mean age:<br>ADA: 61 y<br>ETN: 58 y<br>IFX: 59 y | ADA, ETN: 78 weeks.<br>IFX: 52 weeks. | -Successful dose reduction or discontinuation without flare, (def: DAS28 incr. >1.2 or DAS28 incr. >0.6, with current DAS28 ≥ 3) | Predictive value of ADA DL for successful (without flare):<br>-Discontinuation: AUC 0.66, 95% CI 0.50-0.83.<br>-Dose reduction: AUC 0.51, 95% CI 0.32-0.71.<br><br>Predictive value of ETN DL for successful (without flare):<br>-Discontinuation: AUC 0.63, 95% CI 0.43-0.82.<br>-Dose reduction: AUC 0.36, 95% CI 0.23-0.49; cut-off <2.6 mg/l sens 81%, spec 44%.<br><br>Predictive value IFX DL for successful (without flare):<br>-Discontinuation: AUC 0.44, 95% CI 0.30-0.59.<br>-Dose reduction: AUC 0.65, 95% CI 0.50-0.81.<br><br>-Sensitivity analyses: High ADA DL: AUC 0.86, 0.58-1.00; cut-off >7.8 sens 100% and spec. 86%.<br>-ADAb were infrequent and not predictive of successful discontinuation.<br>-Statistics: ROC-analyses. (No correction for multiple testing)<br>Reviewer conclusion: The study did not demonstrate predictive value for successful discontinuation or dose reduction of DL or ADAb, except for sensitivity analyses for subset of pts with high ADA DL. | Quality in Prognosis Studies Tool (QUIPS) | 1.Study participation: Moderate<br>2.Attrition: Low<br>3.Prognostic factor: Moderate<br>4.Outcome: Low<br>5.Confounding: High<br>6.Statistics: Low                    |
| Chen DY. et al, 2016 <sup>5</sup> | Prospective observational                                                                                                             | RA pts in LDA or remission, treated with ADA | All pts underwent ADA dose-halving. Drug levels were measured before dose reduction.                                                                                                        | 64 pts<br>% male: 10<br>Mean age: 55                                                                                                             | 24 weeks                              | Remission LDA<br><br>Persistent remission and LDA (w24)<br><br>Flare (def: DAS28 ≥3.2)                                           | Baseline median (IQR) ADA DL in pts with W24:<br>-Persistent remission: 10.5 (8.1-11.8) µg/ml<br>-LDA: 4.5 (2.9-5.9) µg/ml<br>-Disease flare: 0.9 µg/ml (0.7-1.0)<br>-Significant difference in ADA DL between pts with both remission and LDA vs. flare, P<0.001.<br><br>Predictive value of ADA DL for persistent remission:<br>AUC 0.998, 95% CI 0.94-1.00, P < 0.001; cut-off 6.4 µg/ml sens. 100%, spec. 93%.<br><br>Predictive value of ADA DL for persistent LDA;<br>AUC 0.995, CI 0.93-1.00, P < 0.001; cut-off 1.9 µg/ml sens. 94%, spec. 100%.                                                                                                                                                                                                                                                                                                                                                                                                                                            | Quality in Prognosis Studies Tool (QUIPS) | 1.Study participation: High<br>2.Attrition: High<br>3.Prognostic factor: Low<br>4.Outcome: Low<br>5.Confounding: Moderate<br>6.Statistics: High                       |

|                                |                           |                                     |                                                                                                                                        |                                    |           |                                                                               |                                                                                                                                                                                                                                                                                                                                                                                                                                            |                                           |                                                                                                                                                     |
|--------------------------------|---------------------------|-------------------------------------|----------------------------------------------------------------------------------------------------------------------------------------|------------------------------------|-----------|-------------------------------------------------------------------------------|--------------------------------------------------------------------------------------------------------------------------------------------------------------------------------------------------------------------------------------------------------------------------------------------------------------------------------------------------------------------------------------------------------------------------------------------|-------------------------------------------|-----------------------------------------------------------------------------------------------------------------------------------------------------|
|                                |                           |                                     |                                                                                                                                        |                                    |           |                                                                               | Reviewer conclusion: The study showed predictive value of low ADA DL for flare                                                                                                                                                                                                                                                                                                                                                             |                                           |                                                                                                                                                     |
| <i>Axial spondyloarthritis</i> |                           |                                     |                                                                                                                                        |                                    |           |                                                                               |                                                                                                                                                                                                                                                                                                                                                                                                                                            |                                           |                                                                                                                                                     |
| Redondo C. et al, 2018         | Prospective observational | AxSpA pts with LDA treated with GLM | Pts with LDA at least 6 months before tapering were included. All underwent tapering. Drug levels were measured before dose reduction. | 21 pts,<br>Mean age and % Male N/A | 24 months | -Flare, (def: increase in ASDAS (from the pre-tapering visit) of $\geq 0.9$ ) | -4 of 5 pts with suboptimal ( $<0.7\mu\text{g/ml}$ ) GLM DL at the pre-tapering visit had flares during follow-up.<br>-1 of 11 patients with GLM DL $>0.7\mu\text{g/ml}$ at pre-tapering visit had flares ( $P = 0.003$ ) during follow-up.<br>Reviewer conclusion: Numerically more pts with suboptimal GLM DL had flares, compared to pts with GLM DL $<0.7\mu\text{g/ml}$ , but small sample size and no effect measures were described | Quality in Prognosis Studies Tool (QUIPS) | 1.Study participation: High<br>2.Attrition: High<br>3.Prognostic factor: Low<br>4.Outcome: Low<br>5.Confounding: Moderate<br>6.Statistics: Moderate |

**PTC-9:** Measurement of biopharmaceutical blood concentrations should be considered to understand clinical non-response.

| Study                       | Study design                | Population                                  | Scope/Intervention                                                                                                                                                                     | Study population                              | Follow-up                    | Outcome measures                                      | Results                                                                                                                                                                                                                                                                                                                                                                                                                                                                                                                                                                                                                                                                                                                                                                                          | Tool used for RoB assessment              | Risk of Bias                                                                                                                                                 |
|-----------------------------|-----------------------------|---------------------------------------------|----------------------------------------------------------------------------------------------------------------------------------------------------------------------------------------|-----------------------------------------------|------------------------------|-------------------------------------------------------|--------------------------------------------------------------------------------------------------------------------------------------------------------------------------------------------------------------------------------------------------------------------------------------------------------------------------------------------------------------------------------------------------------------------------------------------------------------------------------------------------------------------------------------------------------------------------------------------------------------------------------------------------------------------------------------------------------------------------------------------------------------------------------------------------|-------------------------------------------|--------------------------------------------------------------------------------------------------------------------------------------------------------------|
| <i>Rheumatoid arthritis</i> |                             |                                             |                                                                                                                                                                                        |                                               |                              |                                                       |                                                                                                                                                                                                                                                                                                                                                                                                                                                                                                                                                                                                                                                                                                                                                                                                  |                                           |                                                                                                                                                              |
| Mulleman D. et al, 2009     | Prospective observational   | RA pts routinely treated with IFX           | The preliminary therapeutic decision (based on disease activity) was re-evaluated, based on an algorithm including both disease activity and IFX DL, and applied at the next infusion. | 24 pts<br>% male: N/A<br>Mean age: 61 y       | 3 visits (V2-V4) (16 weeks?) | ΔDAS28                                                | -For 7 patients, the IFX dosage was increased for the final therapeutic decision (based on TDM and disease activity), as compared with 3 patients for whom the dosage was increased at the preliminary therapeutic decision (disease activity alone).<br>-Of the 7 patients, 6 were considered to have an inadequate control of disease activity (2 with medium and 4 with low IFX DL) and 1 was considered to have acceptable control (with medium IFX DL).<br><br>-For pts with increased IFX dose (n=7), mean DAS28 decreased by about 20% (P < 0.05)<br>-Reviewer conclusion: Study showed DAS28 improvement for 7 pts with increased IFX dose, but only 4 of these had the dose modified as a result of TDM. No separate analyses for those who had a dose modification as a result of TDM. | Newcastle-Ottawa for cohort studies       | Sum score: **, *<br><br>Selection: **<br>Comparability: -<br>Outcome: *                                                                                      |
| Zänker M. et al, 2018       | Prospective observational   | RA pts with active disease treated with ADA | Pts with active RA (CDAI>19) were given additional 40 mg ADA one week after standard injection ADA DL 5.0–10.0 µg/mL was defined as the target concentration                           | 8 pts were boosted<br>Mean age and % male: NR | 14 days                      | -EULAR response (moderate) (Change in CDAI and DAS28) | -Pts therapeutic ADA DL: 3/3 boosted pts achieved moderate EULAR response.<br>-Pts sub-therapeutic ADA DL: 1/2 boosted pts achieved moderate EULAR response.<br>-Pts supra-therapeutic ADA DL: 2/2 boosted pts achieved moderate EULAR response.<br><br>-ADAb pos pts: 1 pts boosted (out of 4 ADAb pos), responded partially to boost injection<br><br>-Reviewer conclusion: Study did not demonstrate utility of TDM. Very small study                                                                                                                                                                                                                                                                                                                                                         | Newcastle-Ottawa for cohort studies       | Sum score: *, *<br><br>Selection: *<br>Comparability: -<br>Outcome: *                                                                                        |
| Plasencia C. et al, 2015    | Retrospective observational | RA pts treated with IFX                     | -IFX dose increased in pts with insufficient response (DAS28 >3.2).<br>-Assessed retrospectively if response was related to IFX DL prior to dose                                       | 42 pts<br>Mean age: 57y<br>% men: 12          | 12 months                    | -EULAR response,<br>-DAS28 score,                     | -Proportion of pts who achieved good response after 1 <sup>st</sup> dose increase, stratified by IFX DL prior to dose increase (no, low, high):<br>No detectable IFX DL group: 11.1%<br>Low: 16.7%<br>High: 12.5%                                                                                                                                                                                                                                                                                                                                                                                                                                                                                                                                                                                | Quality in Prognosis Studies Tool (QUIPS) | 1.Study participation: High<br>2.Attrition: Moderate<br>3.Prognostic factor: Moderate<br>4.Outcome: Low<br>5.Confounding: Moderate<br>6.Statistics: Moderate |

|                                                   |                                 |                                     |                                                                                                                                                                                       |                                              |                              |                    |                                                                                                                                                                                                                                                                                                                                                                                                                                                                                                                                                                                                                                                                                                                                        |                                     |                                                                                          |
|---------------------------------------------------|---------------------------------|-------------------------------------|---------------------------------------------------------------------------------------------------------------------------------------------------------------------------------------|----------------------------------------------|------------------------------|--------------------|----------------------------------------------------------------------------------------------------------------------------------------------------------------------------------------------------------------------------------------------------------------------------------------------------------------------------------------------------------------------------------------------------------------------------------------------------------------------------------------------------------------------------------------------------------------------------------------------------------------------------------------------------------------------------------------------------------------------------------------|-------------------------------------|------------------------------------------------------------------------------------------|
|                                                   |                                 |                                     | increase, no detectable, low (<1.1 µg/mL) or high (≥1.1 µg/mL).                                                                                                                       |                                              |                              |                    | <p>-Proportion of pts who remained non-responders after 1<sup>st</sup> dose increase, stratified by IFX DL prior to dose increase (no, low, high):<br/>No detectable IFX DL group: 44.4%<br/>Low: 58.3%<br/>High: 37.5%</p> <p>-Proportion of pts who achieved good response after 12 months after the dose increase, stratified by IFX DL prior to dose increase (no, low, high):<br/>No: 25%<br/>Low: 0%<br/>High: 0%</p> <p>-Proportion of pts who remained non-responders after 12 months, stratified by IFX DL prior to dose increase (no, low, high):<br/>No: 50%<br/>Low: 77.8%<br/>High: 71.4%</p> <p>-Reviewers conclusion: The study did not show a clear utility of TDM for prediction of response after dose increase.</p> |                                     |                                                                                          |
| <i>Spondyloarthritis / Ankylosing spondylitis</i> |                                 |                                     |                                                                                                                                                                                       |                                              |                              |                    |                                                                                                                                                                                                                                                                                                                                                                                                                                                                                                                                                                                                                                                                                                                                        |                                     |                                                                                          |
| Méric J-C. et al, 2011                            | Prospective observational study | SpA pts, routinely treated with IFX | The preliminary therapeutic decision (based on disease activity) was re-evaluated, based on an algorithm including both disease activity and IFX DL and applied at the next infusion. | 32 pts<br>% male: 50<br>Median age: 48 years | 3 visits (V2-V4) (16 weeks?) | BASDAI improvement | <p>-The preliminary therapeutic decision (based on disease activity alone) was modified (based on IFX DL) in 10 pts (31%).<br/>- In the 4 patients whose measurement of IFX DL modified the therapeutic decision to an increase in IFX dosage, adaptation of the IFX dose based on DL led to improvement in BASDAI in only 2 out of 4 patients, despite increased DL in all 4.</p> <p>-Reviewer conclusion: The study did not demonstrate utility of TDM. Small study.</p>                                                                                                                                                                                                                                                             | Newcastle-Ottawa for cohort studies | <p>Sum score: **, **</p> <p>Selection: **</p> <p>Comparability: -</p> <p>Outcome: **</p> |

|                                    |                                   |                                                                                          |                                                                                                                                                                                                                                                                                                                                         |                                                                                                 |                         |                              |                                                                                                                                                                                                                                                                                                                                                                   |                                           |                                                                                                                                                      |
|------------------------------------|-----------------------------------|------------------------------------------------------------------------------------------|-----------------------------------------------------------------------------------------------------------------------------------------------------------------------------------------------------------------------------------------------------------------------------------------------------------------------------------------|-------------------------------------------------------------------------------------------------|-------------------------|------------------------------|-------------------------------------------------------------------------------------------------------------------------------------------------------------------------------------------------------------------------------------------------------------------------------------------------------------------------------------------------------------------|-------------------------------------------|------------------------------------------------------------------------------------------------------------------------------------------------------|
| Inman RD. et al, 2008              | Substudy of RCT (phase III-study) | AS pts with insufficient response to treatment with GLM                                  | Pts randomly assigned in a 1:1.8:1.8 ratio to receive placebo or GLM 50 mg or 100 mg. At week 16, pts who achieved <20% improvement from baseline entered early escape. Pts in the placebo, 50-mg and 100-mg group received GLM 50 mg, 100 mg, and continued 100 mg, respectively. The decision of dose escalation was not based on DL. | 356 pts in main study, % male: 72<br>Mean age: 39.5 y                                           | 24 weeks                | ASAS20 response              | -Median serum GLM (assessed retrospectively) among the<br>-21 pts without ASAS20 response after early escape: 1.04 µg/ml<br>-4 pts with ASAS20 response: 0.90 µg/ml.<br>-Reviewers conclusion: No clear difference in GLM DL between those who achieved response after dose escalation , vs. those who did not                                                    | Cochrane RoB2 for RCT                     | Overall: Low<br><br>Randomisation: Low<br>Intervention: Low<br>Missing outcome data: Low<br>Outcome measurement: Low<br>Selective reporting: Low     |
| <b>Drug levels</b>                 |                                   |                                                                                          |                                                                                                                                                                                                                                                                                                                                         |                                                                                                 |                         |                              |                                                                                                                                                                                                                                                                                                                                                                   |                                           |                                                                                                                                                      |
| Ulijn E. et al, 2020 <sup>12</sup> | Retrospective observational       | RA pts who discontinued ADA after >3 months due to inefficacy and started another bDMARD | ADA and ADAb measured retrospectively in non-trough samples collected ≥8 weeks after start ADA and within 2 weeks of discontinuation.                                                                                                                                                                                                   | 137 pts (47 switched to second TNFi and 90 to non TNFi bDMARD)<br>Mean age: 64,4y<br>%male: 31% | 3-6 months after switch | EULAR good response          | ADA levels were not predictive for response in patients that switched to a TNFi (sensitivity/specificity 50%/52%, AUC 0.50 (95% CI 0.29-0.71)) and patients that switched to a non-TNFi (sensitivity/specificity 32%/69%, AUC 0.50 (95% CI 0.34-0.65)).<br><br>Reviewer conclusion: Study did not demonstrate predictive value of DLs for response to next bDMARD | Quality in Prognosis Studies Tool (QUIPS) | 1.Study participation: Moderate<br>2.Attrition: High<br>3.Prognostic factor: Moderate<br>4.Outcome: High<br>5.Confounding: High<br>6.Statistics: Low |
| L'Ami M. et al, 2019               | Prospective observational         | RA pts who started ETN; after switch from ADA (71% discontinued ADA due to failure)      | Pts switching from ADA divided into subgroups based on ADA DL before switch: < 0.5 µg/mL, 0.5–5.0 µg/mL, and ≥ 5.0 µg/mL                                                                                                                                                                                                                | Switchers: 69 pts                                                                               | 52 weeks                | EULAR good/moderate response | Proportion of pts with EULAR good or moderate response, stratified by ADA DL prior to switch:<br>ADA DL < 0.5 µg/mL: 72%<br>ADA DL 0.5–5.0 µg/mL: 50%<br>ADA DL ≥ 5.0 µg/mL: 52%<br><br>Reviewer conclusion: Numerically more pts had response to ETN among pts with ADA DL < 0.5 µg/mL before switch, compared to higher DL                                      | Quality in Prognosis Studies Tool (QUIPS) | 1.Study participation: Low<br>2.Attrition: Moderate<br>3.Prognostic factor: Moderate<br>4.Outcome: Low<br>5.Confounding: High<br>6.Statistics: Low   |

|                                    |                                                                                         |                                                                                          |                                                                                                                                                                                         |                                                                                                                                            |                         |                                                                        |                                                                                                                                                                                                                                                                                                                                                                                                                                                                                                                                                                                                                                                                                                                                                                                                                                                                                                                                        |                                           |                                                                                                                                                               |
|------------------------------------|-----------------------------------------------------------------------------------------|------------------------------------------------------------------------------------------|-----------------------------------------------------------------------------------------------------------------------------------------------------------------------------------------|--------------------------------------------------------------------------------------------------------------------------------------------|-------------------------|------------------------------------------------------------------------|----------------------------------------------------------------------------------------------------------------------------------------------------------------------------------------------------------------------------------------------------------------------------------------------------------------------------------------------------------------------------------------------------------------------------------------------------------------------------------------------------------------------------------------------------------------------------------------------------------------------------------------------------------------------------------------------------------------------------------------------------------------------------------------------------------------------------------------------------------------------------------------------------------------------------------------|-------------------------------------------|---------------------------------------------------------------------------------------------------------------------------------------------------------------|
| Vincent FB. et al, 2016            | Prospective observational multicenter study (retrospective assessments from one center) | RA and AS pts, switching to second TNFi due to failure to first TNFi                     | DL measured when decision of failure was made and before the switch. No modifications in dose was made (physicians' awareness of DL not specified) Response to subsequent TNFi assessed | 75 pts, RA: 44 and AS: 31<br>First TNFi: IFX 30, ADA 15, ETN 30<br>Second TNFi: IFX 10, ADA 38, ETN 28<br><br>Mean age 49,7y<br>% male: 29 | 3 months                | -EULAR response for RA<br>-BASDAI 20 points (0-100) improvement for AS | Mean [SD] DL of first TNFi in:<br>Responders to 2 <sup>nd</sup> (all TNFi) (n = 36): 4.4 ±7.1<br>Non-responders to 2 <sup>nd</sup> (n = 23): 8.7 ±24.3, p=0.37<br><br>IFX DL (as 1 <sup>st</sup> TNFi) in responders to 2 <sup>nd</sup> TNFi: 2.9 ±6.5<br>IFX DL (as 1 <sup>st</sup> TNFi) in non-responders to 2 <sup>nd</sup> TNFi: 3.2 ±6.5, p=0.91<br><br>ADA DL (as 1 <sup>st</sup> TNFi) in responders to 2 <sup>nd</sup> TNFi: 10.0 ±10.5<br>ADA DL (as 1 <sup>st</sup> TNFi) in non-responders to 2 <sup>nd</sup> TNFi: 29.9 ±53.3, p=0.45<br><br>ETN DL (as 1 <sup>st</sup> TNFi) in responders to 2 <sup>nd</sup> TNFi: 2.8 ±3.0<br>ETN DL (as 1 <sup>st</sup> TNFi) in non-responders to 2 <sup>nd</sup> TNFi: 4.0 ±4.3, p=0.66<br><br>Reviewer conclusion: Mean [SD] DLs of the 1 <sup>st</sup> TNFi were numerically lower, but not significantly different, among responders vs. non-responders to 2 <sup>nd</sup> TNFi. | Quality in Prognosis Studies Tool (QUIPS) | 1.Study participation: Moderate<br>2.Attrition: Moderate<br>3.Prognostic factor: High<br>4.Outcome: Moderate<br>5.Confounding: High<br>6.Statistics: Moderate |
| <i>Anti-drug antibodies (ADAb)</i> |                                                                                         |                                                                                          |                                                                                                                                                                                         |                                                                                                                                            |                         |                                                                        |                                                                                                                                                                                                                                                                                                                                                                                                                                                                                                                                                                                                                                                                                                                                                                                                                                                                                                                                        |                                           |                                                                                                                                                               |
| Ulijn E. et al, 2020               | Retrospective observational                                                             | RA pts who discontinued ADA after >3 months due to inefficacy and started another bDMARD | ADA and ADAb measured retrospectively in non-trough samples collected ≥8 weeks after start ADA and within 2 weeks of discontinuation. ADAb within 12 weeks after discontinuation.       | 137 pts (47 switched to second TNFi and 90 to non TNFi bDMARD)<br>Mean age: 64,4y<br>%male: 31%                                            | 3-6 months after switch | EULAR good response                                                    | ADAb presence was not predictive for response in switchers to a TNFi (sensitivity/specificity 18%/75%, AUC 0.46 (95%CI 0.32-0.59)) or a non-TNFi (sensitivity/specificity 33%/70%, AUC 0.52 (95%CI 0.42-0.63)).<br><br>Reviewer conclusion: Study did not demonstrate predictive value of ADAb for response to next bDMARD                                                                                                                                                                                                                                                                                                                                                                                                                                                                                                                                                                                                             | Quality in Prognosis Studies Tool (QUIPS) | 1.Study participation: Moderate<br>2.Attrition: High<br>3.Prognostic factor: Moderate<br>4.Outcome: High<br>5.Confounding: High<br>6.Statistics: Low          |
| Vincent FB. et al, 2016            | Prospective observational                                                               | RA and AS pts, switching to second TNFi due to failure to first TNFi (primary or         | ADAb measured when decision of failure was made and before the switch. No modifications in dose was made (physicians'                                                                   | 75 pts, RA: 44 and AS: 31<br>First TNFi: IFX 30, ADA 15, ETN 30<br>Second TNFi: IFX 10, ADA 38, ETN 28<br>Mean age 49,7y                   | 3 months                | -EULAR response for RA<br>-BASDAI 20 points (0-100) improvement for AS | ADAb to the 1 <sup>st</sup> (failed) TNFi was present in 18 (72%) of responders and 7 (28%) of non-responders to 2 <sup>nd</sup> TNFi, respectively, p 0.31.<br><br>Reviewer conclusion: Presence of ADAb was numerically more frequent, but not significantly different, among responders vs. non-responders to 2 <sup>nd</sup> TNFi.                                                                                                                                                                                                                                                                                                                                                                                                                                                                                                                                                                                                 | Quality in Prognosis Studies Tool (QUIPS) | 1.Study participation: Moderate<br>2.Attrition: Moderate<br>3.Prognostic factor: High<br>4.Outcome: Moderate<br>5.Confounding: High<br>6.Statistics: Moderate |

|                          |                                  |                                                                                                          |                                                                                                           |                                                                                                                    |          |                                        |                                                                                                                                                                                                                                                                                                                                                                                                                                                                                                                                                                                                                                                                                                                                                                                                                                                                |                                           |                                                                                                                                                                  |
|--------------------------|----------------------------------|----------------------------------------------------------------------------------------------------------|-----------------------------------------------------------------------------------------------------------|--------------------------------------------------------------------------------------------------------------------|----------|----------------------------------------|----------------------------------------------------------------------------------------------------------------------------------------------------------------------------------------------------------------------------------------------------------------------------------------------------------------------------------------------------------------------------------------------------------------------------------------------------------------------------------------------------------------------------------------------------------------------------------------------------------------------------------------------------------------------------------------------------------------------------------------------------------------------------------------------------------------------------------------------------------------|-------------------------------------------|------------------------------------------------------------------------------------------------------------------------------------------------------------------|
|                          |                                  | secondary failure or intolerance)                                                                        | awareness of ADAb status not specified) Response to subsequent TNFi assessed                              | % male: 29                                                                                                         |          |                                        |                                                                                                                                                                                                                                                                                                                                                                                                                                                                                                                                                                                                                                                                                                                                                                                                                                                                |                                           |                                                                                                                                                                  |
| Plasencia C. et al, 2013 | Ambispective observational study | SpA starting second TNFi due to failure (93%) and/or AE (19%) to first TNFi                              |                                                                                                           | 42 pts<br>Mean age: 50<br>% male: 55<br>-1st TNFi: 20 IFX, 5 ADA, 17 ETN<br>-2nd TNFi: 9 IFX, 19 ADA, 8 ETN, 6 GLM | 6 months | -ASDAS<br>-ASDAS high disease activity | ASDAS (mean $\pm$ SD) 6 months after switch to second TNFi, stratified by presence of ADAb to first TNFi:<br>-Pts with previous ADAb: 1.62 $\pm$ 0.93<br>-Pts without previous ADAb: 2.79 $\pm$ 1.01<br>-Significant difference in mean ASDAS, p = 0.002<br><br>Proportion of pts with ASDAS high disease activity 6 months after switch to second TNFi, stratified by presence of ADAb to first TNFi:<br>-Pts with previous ADAb: 3 out of 11 (27.3%)<br>-Pts without previous ADAb: 25 out of 31 (80.6%)<br>-Proportion of pts with ASDAS high disease activity significantly different, p = 0.002<br><br>Reviewer conclusion: Presence of ADAb to previous TNFi was significantly associated with response to subsequent TNFi                                                                                                                               | Quality in Prognosis Studies Tool (QUIPS) | 1.Study participation: Moderate<br>2.Attrition: Moderate<br>3.Prognostic factor: Moderate<br>4.Outcome: Low<br>5.Confounding: Moderate<br>6.Statistics: Moderate |
| Jamnitski A. et al, 2011 | Prospective observational        | RA pts with active disease starting ETN after switch from IFX or ADA due to failure (n=76) or AE (n=12). | Switchers divided into groups with/without ADAb to previous IFX or ADA. ADAb measured prior to start ETN. | -89 pts (in switcher group)<br>Mean age: 53 y<br>% male: 12                                                        | 28 weeks | - $\Delta$ DAS28<br>-EULAR response    | Response to ETN, stratified by presence of ADAb to 1st TNFi:<br>-Switchers with ADAb to 1st TNFi: $\Delta$ DAS28=2.0 $\pm$ 1.3;<br>-Switchers without ADAb to 1st TNFi: $\Delta$ DAS28=1.2 $\pm$ 1.3;<br>-Difference in $\Delta$ DAS28 was statistically significant, p=0.017 (after adjustment for baseline DAS28).<br><br>- EULAR response among switchers with ADAb to first TNFi: 29% good, 62% moderate and 9% were non-responders, compared to 24% good, 43% moderate and 33% non-responders in the switchers without ADAb. In the post hoc analysis only the percentage of EULAR non-responders was different between two groups (p=0.014).<br><br>-Statistics: Mann-Whitney test and multiple regression models adjusted for baseline DAS28.<br><br>Reviewer conclusion: Switchers with ADAb to first TNFi had better responses when switching to ETN. | Quality in Prognosis Studies Tool (QUIPS) | 1.Study participation: Low<br>2.Attrition: Low<br>3.Prognostic factor: Moderate<br>4.Outcome: Low<br>5.Confounding: Low<br>6.Statistics: Moderate                |

|                             |                           |                                                                |                                                                                                                                      |                                                                                               |          |                               |                                                                                                                                                                                                                                                                                                                                                                                                                                                                                                                                                                                                                                                                                            |                                           |                                                                                                                                                     |
|-----------------------------|---------------------------|----------------------------------------------------------------|--------------------------------------------------------------------------------------------------------------------------------------|-----------------------------------------------------------------------------------------------|----------|-------------------------------|--------------------------------------------------------------------------------------------------------------------------------------------------------------------------------------------------------------------------------------------------------------------------------------------------------------------------------------------------------------------------------------------------------------------------------------------------------------------------------------------------------------------------------------------------------------------------------------------------------------------------------------------------------------------------------------------|-------------------------------------------|-----------------------------------------------------------------------------------------------------------------------------------------------------|
| Bartelds GM. et al, 2010    | Prospective observational | RA pts with active disease starting ADA, after switch from IFX | IFX ADAb was determined before the start of ADA. ADA ADAb was determined at time points between baseline and 28 weeks.               | -52 pts switched from IFX<br>Mean age: 52 y<br>% male: 17                                     | 28 weeks | -ΔDAS28                       | Response ΔDAS28 (mean ± SD) to ADA in pts stratified by previous IFX ADAb:<br>-Switchers without previous IFX ADAb: 0.9±1.4<br>-Switchers with previous IFX ADAb: 1.2±1.3<br>-Mean ΔDAS28 did not differ significantly between switchers with and without IFX ADAb; p=0.969 (adjusted, "multiple regression analyses")<br><br>Reviewer conclusion: No difference response (ΔDAS28) to ADA (second TNFi), between switchers with vs. without ADAb to IFX (first TNFi)                                                                                                                                                                                                                       | Quality in Prognosis Studies Tool (QUIPS) | 1.Study participation: Low<br>2.Attrition: Low<br>3.Prognostic factor: Moderate<br>4.Outcome: Low<br>5.Confounding: Low<br>6.Statistics: Low        |
| Bingham C. et al, 2009      | Prospective observational | RA pts who have failed IFX, starting ETN                       | IFX ADAb measured at baseline and after 16 weeks of ETN-treatment                                                                    | 201 pts<br>-Primary IFX-failure: 29<br>-Secondary failure: 172<br>Mean age: 57y<br>% male: 20 | 16 weeks | -EULAR good/moderate response | Proportion of pts (n,%) with baseline IFX ADAb, stratified by response to ETN:<br>-ETN responders: 42 (36%)<br>-ETN non-responders: 24 (29%)<br><br>-Subanalyses of pts with high levels (≥ 1600 ng/mL; above the quantifiable limit) of IFX ADAb at baseline: included 18 (15%) ETN-responders and 7 (8%) non-responders<br>Reviewer conclusion: No clear difference in proportion of IFX ADAb at baseline among ETN-responders, vs. non-responders.                                                                                                                                                                                                                                      | Quality in Prognosis Studies Tool (QUIPS) | 1.Study participation: Low<br>2.Attrition: Low<br>3.Prognostic factor: Low<br>4.Outcome: Low<br>5.Confounding: Moderate<br>6.Statistics: Moderate   |
| Van Der Bijl A. et al, 2008 | Prospective observational | RA pts who have failed previous IFX-treatment, starting ADA    | Pts with previous treatment failure to IFX due to lack or loss of response or intolerance. Response to ADA evaluated after 16 weeks. | 41 pts, 37 completed 16 weeks<br>Mean age: 55y<br>% male: 12                                  | 16 weeks | EULAR and ACR20/50 response   | Proportion of pts with W16 ACR20 response to ADA, stratified by presence of IFX ADAb:<br>-Switchers with previous IFX ADAb: 47%<br>-Switchers with previous IFX ADAb: 43%<br><br>Proportion of pts with W16 ACR50 response to ADA, stratified by presence of IFX ADAb:<br>-Switchers with previous IFX ADAb: 47%<br>-Switchers with previous IFX ADAb: 7%<br><br>Proportion of pts with W16 EULAR good/moderate response to ADA, stratified by presence of IFX ADAb:<br>-Switchers with previous IFX ADAb: 53%<br>-Switchers with previous IFX ADAb: 53%<br><br>Reviewer conclusion: No clear difference in response to ADA, in previous IFX ADAb pos vs. neg, (except for ACR50 response) | Quality in Prognosis Studies Tool (QUIPS) | 1.Study participation: Moderate<br>2.Attrition: Low<br>3.Prognostic factor: High<br>4.Outcome: Low<br>5.Confounding: High<br>6.Statistics: Moderate |

|                       |                           |                                                                                   |                                                                                                                                                                                                                                                                                                           |                                                                                                     |                                                                                                                          |                                                   |                                                                                                                                                                                                                                                                                                                                                                                                                                                                                                                                                                                                                                                                                                                                                                                                                                                                                                                                                                                                                                                                                                                                                                                                                                                                                                                                                                                                                                                                                                                                                                                                                                                                                                                                                                                                                                                                                                                                                                                                                                                                                                                                                                                                                                                                                                                                                                                                                                                             |                                           |                                                                                                                                                                                                                                          |
|-----------------------|---------------------------|-----------------------------------------------------------------------------------|-----------------------------------------------------------------------------------------------------------------------------------------------------------------------------------------------------------------------------------------------------------------------------------------------------------|-----------------------------------------------------------------------------------------------------|--------------------------------------------------------------------------------------------------------------------------|---------------------------------------------------|-------------------------------------------------------------------------------------------------------------------------------------------------------------------------------------------------------------------------------------------------------------------------------------------------------------------------------------------------------------------------------------------------------------------------------------------------------------------------------------------------------------------------------------------------------------------------------------------------------------------------------------------------------------------------------------------------------------------------------------------------------------------------------------------------------------------------------------------------------------------------------------------------------------------------------------------------------------------------------------------------------------------------------------------------------------------------------------------------------------------------------------------------------------------------------------------------------------------------------------------------------------------------------------------------------------------------------------------------------------------------------------------------------------------------------------------------------------------------------------------------------------------------------------------------------------------------------------------------------------------------------------------------------------------------------------------------------------------------------------------------------------------------------------------------------------------------------------------------------------------------------------------------------------------------------------------------------------------------------------------------------------------------------------------------------------------------------------------------------------------------------------------------------------------------------------------------------------------------------------------------------------------------------------------------------------------------------------------------------------------------------------------------------------------------------------------------------------|-------------------------------------------|------------------------------------------------------------------------------------------------------------------------------------------------------------------------------------------------------------------------------------------|
| Mazilu D. et al, 2014 | Prospective observational | RA pts treated with RTX, IFX, ADA or ETN, included at time of inadequate response | Pts tested for both serum drug level and ADAb at the time of their first sign of inadequate response (baseline)<br>Def. Flare: one of the following: an increase in SDAI, an increase in ESR and/or CRP, increase in DAS score to moderate or high disease activity, and a lower class in EULAR response. | 154 pts incl. Final cohort: 72 pts.<br>RTX: 25 IFX: 20<br>ETN: 18 ADA: 9<br>Mean age and % male: NR | 2 years. Disease activity/persistence of flare was evaluated after 6 months for RTX, 2 months for IFX, 3 months for ETN. | -DAS28<br>-SDAI<br>-EULAR good/moderate response. | <p>RTX: Disease activity 6 months after first sign of inadequate response, stratified by RTX DL at baseline (time of first sign of inadequate response);<br/>-Mean (SD) DAS28 <math>2.93 \pm 1.20</math> in pts with detectable RTX at baseline, vs. <math>3.27 \pm 1.47</math> in pts with undetectable RTX at baseline (<math>P = 0.01</math>).<br/>-Mean (SD) SDAI <math>12.23 \pm 14.1320</math> in pts with detectable RTX at baseline, vs. <math>14.83 \pm 20.51</math> in pts with undetectable RTX at baseline (<math>P = 0.033</math>).<br/>-EULAR response achieved in 12/16 pts with detectable RTX at baseline, vs. 3/9 pts with undetectable RTX at baseline (<math>P=0.038</math>).</p> <p>IFX: Disease activity 2 months after first sign of inadequate response, stratified by IFX DL at baseline (time of first sign of inadequate response);<br/>-Mean (SD) DAS28 <math>3.67 \pm 1.24</math> in pts with detectable IFX at baseline, vs. <math>5.59 \pm 1.07</math> in pts with undetectable IFX at baseline (<math>P = 0.002</math>).<br/>-Mean (SD) SDAI <math>17.26 \pm 12.29</math> in pts with detectable IFX at baseline, vs. <math>44.33 \pm 18.22</math> in pts with undetectable IFX at baseline (<math>P = 0.001</math>).<br/>-EULAR response achieved in 7/7 pts with detectable IFX at baseline, vs. 1/11 pts with undetectable RTX at baseline (<math>P=0.002</math>).<br/>IFX ADAb detected in 9/20 IFX-pts; All 9 had no EULAR response after 2 months.</p> <p>ETN: Disease activity 3 months after first sign of inadequate response stratified by ETN DL at baseline (time of first sign of inadequate response);<br/>-Mean (SD) DAS28 <math>7.17 \pm 1.21</math> in pts with detectable ETN at baseline, vs. <math>3.57 \pm 1.65</math> in pts with undetectable ETN at baseline (<math>P = 0.003</math>).<br/>-Mean (SD) SDAI <math>19.06</math> in pts with detectable ETN at baseline, vs. <math>58.73</math> in pts with undetectable ETN at baseline (<math>P = 0.026</math>).<br/>-EULAR response achieved in 12/15 pts with detectable ETN at baseline, vs. 0/3 pts with undetectable ETN at baseline (<math>P=0.023</math>).</p> <p>ADA: sample size too small<br/>Reviewer conclusion: Statistically significant differences in disease activity and/or response at time of evaluation, in pts stratified by DL at baseline. Pts with detectable DLs at baseline had lower disease activity at evaluation.</p> | Quality in Prognosis Studies Tool (QUIPS) | <ol style="list-style-type: none"> <li>1.Study participation: High</li> <li>2.Attrition: Moderate</li> <li>3.Prognostic factor: Moderate</li> <li>4.Outcome: Moderate</li> <li>5.Confounding: High</li> <li>6.Statistics: Low</li> </ol> |
|-----------------------|---------------------------|-----------------------------------------------------------------------------------|-----------------------------------------------------------------------------------------------------------------------------------------------------------------------------------------------------------------------------------------------------------------------------------------------------------|-----------------------------------------------------------------------------------------------------|--------------------------------------------------------------------------------------------------------------------------|---------------------------------------------------|-------------------------------------------------------------------------------------------------------------------------------------------------------------------------------------------------------------------------------------------------------------------------------------------------------------------------------------------------------------------------------------------------------------------------------------------------------------------------------------------------------------------------------------------------------------------------------------------------------------------------------------------------------------------------------------------------------------------------------------------------------------------------------------------------------------------------------------------------------------------------------------------------------------------------------------------------------------------------------------------------------------------------------------------------------------------------------------------------------------------------------------------------------------------------------------------------------------------------------------------------------------------------------------------------------------------------------------------------------------------------------------------------------------------------------------------------------------------------------------------------------------------------------------------------------------------------------------------------------------------------------------------------------------------------------------------------------------------------------------------------------------------------------------------------------------------------------------------------------------------------------------------------------------------------------------------------------------------------------------------------------------------------------------------------------------------------------------------------------------------------------------------------------------------------------------------------------------------------------------------------------------------------------------------------------------------------------------------------------------------------------------------------------------------------------------------------------------|-------------------------------------------|------------------------------------------------------------------------------------------------------------------------------------------------------------------------------------------------------------------------------------------|

**PTC-10:** Measurement of ADAb should be considered in the case of immunogenic biopharmaceuticals, alongside biopharmaceutical blood concentrations, at the time of clinical non-response.

| Study                                  | Study design                             | Population                              | Scope/Intervention                                                             | Study population                | Follow-up                                  | Outcome measures                  | Results                                                                                                                                                                                                                                                                                                                                                      | Tool used for RoB assessment        | Risk of Bias                                                                 |
|----------------------------------------|------------------------------------------|-----------------------------------------|--------------------------------------------------------------------------------|---------------------------------|--------------------------------------------|-----------------------------------|--------------------------------------------------------------------------------------------------------------------------------------------------------------------------------------------------------------------------------------------------------------------------------------------------------------------------------------------------------------|-------------------------------------|------------------------------------------------------------------------------|
| <b>Senabre Gallego JM. et al, 2019</b> | Cross-sectional observational study      | Pts with axial SpA                      | Measurement of ADAb (bELISA: specific detection)                               | 51 pts                          | >3 months                                  | Clinical response                 | ASDAS-CRP<2.1: ADAb+(4%); ASDAS-CRP≥2.1: ADAb+(52%); p<0.001<br>ASDAS-ESR<2.1: ADAb+(0%); ASDAS-CRP≥2.1: ADAb+(46%); p<0.01<br>BASDAI<4: ADAb+(0%); BASDAI≥4: ADAb+(47%); p<0.001<br><br>Results were not adjusted for confounders                                                                                                                           | Newcastle-Ottawa for cohort studies | Sum score: **, **, *<br><br>Selection: **<br>Comparability: **<br>Outcome: * |
| <b>Burmester GR. et al, 2017</b>       | Post-hoc analysis of several RCT         | RA pts treated with TCZ                 | Measurement of ADAb (by bELISA, specific detection)                            | 8974 pts from the different RCT | TCZ-SC (up to 3.5yr)<br>Tcz-IV (up to 5yr) | Clinical response                 | Incidence of ADAb:<br>- 1.5% (n=47) pts who received TCZ-SC developed ADAb<br>- 1.2% (n=69) pts who received TCZ-IV developed ADAb<br><br>Among all patients who developed ADAb with neutralising potential following TCZ treatment, none experienced loss of efficacy, regardless of administration route.<br><br>Results were not adjusted for confounders | AMSTAR-2                            | HIGH<br><br>3x YES<br>3x partial-YES<br>9x NO<br>1x N/A                      |
| <b>Hoxha A. et al, 2016</b>            | Open-label multicenter prospective study | Pts with RA, AS or PsA treated with ADA | Measurement of ADAb (sandwich ELISA: specific detection) at 4, 12 and 24 weeks | 58 pts                          | 24 weeks                                   | Treatment failure within 24 weeks | ADAb at week 4 were significantly associated with lack of response and/or loss of efficacy (treatment failure) within 24 weeks: OR 4.5, 95% CI 1.1-18.2; p=0.035<br><br>Results were not adjusted for confounders                                                                                                                                            | Newcastle-Ottawa for cohort studies | Sum score: **, -, *<br><br>Selection: **<br>Comparability: -<br>Outcome: *   |

|                                 |                                   |                                                 |                                                                                                                                                                                                                                                                |                                                                                                            |                   |                                        |                                                                                                                                                                                                                                                                                                                                                                                                                                                                                                                                                 |                                           |                                                                                                                                                  |
|---------------------------------|-----------------------------------|-------------------------------------------------|----------------------------------------------------------------------------------------------------------------------------------------------------------------------------------------------------------------------------------------------------------------|------------------------------------------------------------------------------------------------------------|-------------------|----------------------------------------|-------------------------------------------------------------------------------------------------------------------------------------------------------------------------------------------------------------------------------------------------------------------------------------------------------------------------------------------------------------------------------------------------------------------------------------------------------------------------------------------------------------------------------------------------|-------------------------------------------|--------------------------------------------------------------------------------------------------------------------------------------------------|
| <b>Arstikyte I. et al, 2015</b> | Retrospective observational study | Pts with RA or SpA treated with ADA, Ifx or ETN | Measurement of ADAb (sandwich ELISA: specific detection)<br>Blood samples collected at:<br>Ifx: at 42 (12-66) months after treatment initiation<br>AdDA: at 6 (3-18) months after treatment initiation<br>ETN: at 30 (12-54) months after treatment initiation | 143 pts (62 with RA and 81 with SpA).<br>ADA: 25 pts (17.4%)<br>ETN: 61 pts (42.7%)<br>Ifx: 57 pts (39.9%) | 2 years           | - Dose increasing<br>- Stop treatment  | 15 (10%) pts developed ADAb:<br>Ifx:<br>14 (25%) pts developed ADAb<br><br>Patients with ADAb have lower odds to continue with the same dose of Ifx: OR 0.2 (95% CI 0.05-0.69); p<0.05<br><br>Association between ADAb and the stop of the treatment: OR 9.28 (95% CI 1.64-52.52); p<0.05<br><br><u>ADA:</u><br>1 (4%) pts developed ADAb<br><u>ETN:</u><br>0 (0%) pts developed ADAb<br><br>Results were not adjusted for confounders                                                                                                          | Quality in Prognosis Studies Tool (QUIPS) | 1.Study participation: high<br>2.Attrition: high<br>3.Prognostic factor: High<br>4.Outcome: Low<br>5.Confounding: High<br>6.Statistics: Moderate |
| <b>Krintel SB. et al, 2013</b>  | Prospective observational study   | TNFi naïve pts with RA treated with Ifx         | Measurement of ADAb after 6, 14 and 52 weeks (biochip platform: specific capture but non-specific detection)                                                                                                                                                   | 218 pts                                                                                                    | 52 weeks          | Treatment response                     | - There was no significant association between ADAb status after 6 (p=0.1) and 14 (p=0.6) weeks of treatment and withdrawal due to treatment failure during the 52-week follow-up.<br>- ADAb+ pts were less likely to achieve sustained minimal disease activity (DAS28<3.2) compared with ADAb- pts (HR=0.49, 95% CI 0.27-0.92, p=0.023).<br>- ADAb+ pts were less likely to achieve sustained remission (DAS28<2.6) compared with patients without ADAb (HR=0.53, 95% CI 0.28-0.98; p=0.04).<br><br>Results were not adjusted for confounders | Newcastle-Ottawa for cohort studies       | Sum score: **, -, *<br><br>Selection: **<br>Comparability: -<br>Outcome: *                                                                       |
| <b>Plasencia C. et al, 2012</b> | Ambispective observational study  | Pts with SpA treated with Ifx                   | Measurement of ADAb (by bELISA, specific detection)                                                                                                                                                                                                            | 94 pts                                                                                                     | A mean of 7 years | - Clinical response<br>- TNFi survival | - ΔASDAS was lower in ADAb+ pts at any time:<br>At 6 months: 0.48±0.73 vs 1.47±1.66; p=0.029<br>At 1 year: 0.81±1.20 vs 1.56±1.67; p=0.098<br>At >4 years: 0.45±0.82 vs 1.43±1.25; p=0.022<br><br>- The median Ifx survival time was 4.25 years (95% CI: 3.06 to 5.43) in ADAb+ pts vs. 8.19 years (95% CI: 7.54 to 8.85) in ADAb- pts (p<0.001)<br><br>Results were not adjusted for confounders                                                                                                                                               | Newcastle-Ottawa for cohort studies       | Sum score: ***, -, **<br><br>Selection: ***<br>Comparability: -<br>Outcome: **                                                                   |

|                                       |                                        |                              |                                                                                                    |         |           |                                                                             |                                                                                                                                                                                                                                                                                                                                                                                                                                                                                                                                                                                                                                                                                                                                                                                                                                                                                                                                                     |                                           |                                                                                                                                                   |
|---------------------------------------|----------------------------------------|------------------------------|----------------------------------------------------------------------------------------------------|---------|-----------|-----------------------------------------------------------------------------|-----------------------------------------------------------------------------------------------------------------------------------------------------------------------------------------------------------------------------------------------------------------------------------------------------------------------------------------------------------------------------------------------------------------------------------------------------------------------------------------------------------------------------------------------------------------------------------------------------------------------------------------------------------------------------------------------------------------------------------------------------------------------------------------------------------------------------------------------------------------------------------------------------------------------------------------------------|-------------------------------------------|---------------------------------------------------------------------------------------------------------------------------------------------------|
| <b>Bartelds GM. et al, 2011</b>       | Prospective observational cohort study | Pts with RA treated with ADA | Measurement of ADAb (by RIA, specific detection) at 4, 16, 28, 40, 52, 78, 104, 130, and 156 weeks | 272 pts | 3 years   | - Treatment failure<br>- Treatment discontinuation                          | - Minimal disease activity (DAS28<3.2): ADAb+ pts less often achieved sustained minimal disease activity compared with ADAb- pts:<br>Unadjusted model: p<0.001<br>Adjusted model: Correction for confounding variables (methotrexate dosage, ESR, and C-reactive protein): HR=3.6; 95% CI, 1.8-7.2; p<0.001<br><br>- Clinical remission: ADAb+ pts less often achieved clinical remission compared with ADAb- pts:<br>Unadjusted model: p<0.001<br>Adjusted model: Correction for confounding variables (methotrexate dosage, ESR, and C-reactive protein): HR=7.1; 95% CI, 2.1-23.4; p<0.001<br><br>- Discontinuation due to treatment failure: ADAb+ pts more often discontinued the treatment than ADAb- pts [29 (38%) vs. 28 (14%), respectively]:<br>Unadjusted model: p<0.001<br>Adjusted model: Correction for confounding variables (methotrexate use, number of previous DMARDs, and C-reactive protein): HR=3.0; 95% CI, 1.6-5.5; p<0.001 | Quality in Prognosis Studies Tool (QUIPS) | 1.Study participation: low<br>2.Attrition: moderate<br>3.Prognostic factor: low<br>4.Outcome: Low<br>5.Confounding: moderate<br>6.Statistics: low |
| <b>Pascual-Salcedo D. et al, 2011</b> | Retrospective observational study      | Pts with RA                  | Measurement of ADAb (by bELISA, specific detection)                                                | 85 pts  | >4years   | - Treatment discontinuation<br>- Clinical response                          | - IFX discontinuation was higher in pts who developed ADAb [23 (82.1%) out of 28 vs 22 (39.3%) out of 57; p<0.001].<br><br>- ADAb+ pts had higher DAS28 values at 6-month follow-up [4.85 (1.24) vs 3.67 (1.12); p=0.004], 1 year [4.95 (1.24) vs 3.13 (1.17); p=0.002] and >4 years [4.00 (1.35) vs 3.46 (1.22), p=0.004]<br><br>Results were not adjusted for confounders                                                                                                                                                                                                                                                                                                                                                                                                                                                                                                                                                                         | Newcastle-Ottawa for cohort studies       | Sum score: ***, -, **<br><br>Selection: ***<br>Comparability: -<br>Outcome: **                                                                    |
| <b>Bendtzen K. et al, 2006</b>        | Retrospective observational study      | Pts with RA treated with IFX | Measurement of ADAb (by RIA, specific detection) at 1.5, 3 and 6 months                            | 106 pts | >6 months | - Treatment discontinuation<br>- Dose increasing due to inadequate response | - Early formation of ADAb was also associated with subsequent discontinuation of therapy (within 18 months); (any discontinuation: p=0.0001):<br>Therapy failure: p=0.009<br>Infusion reaction: p=0.001<br><br>- Detection of ADAb at an early time point (3 months) was associated with later dose increases (within 18 months) necessitated by inadequate clinical response (p=0.0005)<br><br>Results were not adjusted for confounders                                                                                                                                                                                                                                                                                                                                                                                                                                                                                                           | Newcastle-Ottawa for cohort studies       | Sum score: **, -, *<br><br>Selection: **<br>Comparability: -<br>Outcome: *                                                                        |

|                                |                                 |                              |                                                  |        |        |                   |                                                                                                                                                                                                                                                       |                                           |                                                                                                                                                |
|--------------------------------|---------------------------------|------------------------------|--------------------------------------------------|--------|--------|-------------------|-------------------------------------------------------------------------------------------------------------------------------------------------------------------------------------------------------------------------------------------------------|-------------------------------------------|------------------------------------------------------------------------------------------------------------------------------------------------|
| <b>Wolbink GJ. et al, 2006</b> | prospective observational study | Pts with RA treated with IFX | Measurement of ADAb (by RIA, specific detection) | 51 pts | 1 year | Clinical response | ADAb- pts were significantly more often classified as responders when compared with ADAb+ pts (20 of 29 without antibodies [69%] versus 8 of 22 with antibodies [36%] considered responders); p=0.04<br><br>Results were not adjusted for confounders | Quality in Prognosis Studies Tool (QUIPS) | 1.Study participation: moderate<br>2.Attrition: high<br>3.Prognostic factor: low<br>4.Outcome: Low<br>5.Confounding: high<br>6.Statistics: low |
|--------------------------------|---------------------------------|------------------------------|--------------------------------------------------|--------|--------|-------------------|-------------------------------------------------------------------------------------------------------------------------------------------------------------------------------------------------------------------------------------------------------|-------------------------------------------|------------------------------------------------------------------------------------------------------------------------------------------------|

| Study             | Study design                                                   | Population    | Scope/Intervention                                                           | Study population                                                                                                 | Follow-up | Outcome measures                         | Results                                                                                                                                                                                                                                                                                                                                                                               | Tool used for RoB assessment              | Risk of Bias                                                                                                                                        |
|-------------------|----------------------------------------------------------------|---------------|------------------------------------------------------------------------------|------------------------------------------------------------------------------------------------------------------|-----------|------------------------------------------|---------------------------------------------------------------------------------------------------------------------------------------------------------------------------------------------------------------------------------------------------------------------------------------------------------------------------------------------------------------------------------------|-------------------------------------------|-----------------------------------------------------------------------------------------------------------------------------------------------------|
| <b>ADALIMUMAB</b> |                                                                |               |                                                                              |                                                                                                                  |           |                                          |                                                                                                                                                                                                                                                                                                                                                                                       |                                           |                                                                                                                                                     |
| Bartelds 2007     | Prospective observational cohort, monocentric, the Netherlands | RA ADA        | Association antibodies with drug level and clinical response                 | 121 pts, 79% female, age 53, baseline DAS28 5.3, diseases duration 12 years, MTX use 79%                         | 28 weeks  | Drug levels and antibodies               | Adalimumab concentrations were significantly lower in patients with detectable anti-adalimumab antibodies than in patients without antibodies. Median 1.2, range 0.0 – 5.6 mg/l vs. median 11.0, range 2.0 – 33 mg/l (p<0.001)                                                                                                                                                        | Quality in Prognosis Studies Tool (QUIPS) | 1.Study participation: moderate<br>2.Attrition: moderate<br>3.Prognostic factor: high<br>4.Outcome: Low<br>5.Confounding: high<br>6.Statistics: low |
| Ding 2020         | Observational cohort study, monocentric, China                 | AS adalimumab | To determine a concentration-effect curve for adalimumab in patients with AS | 31 pts, age 31 yrs, male 94%, disease duration 7 yrs, CRP 16 mg/l, ASDAScrp 4.06, BASDAI 6.1, NSAIDs 15%         | 12 weeks  | ADA concentrations, anti-drug antibodies | Patients who were antibody negative had significantly higher adalimumab levels than patients who were antibody positive (week 4: median 7.53 µg/mL IQR 5.94–8.30<br><br>vs. 3.57 µg/mL IQR 2.33–6.42, respectively, p=0.001; week 8: 11.35 µg/mL IQR 9.76–16.03 vs. 5.85 µg/mL IQR 2.69–10.07, p=0.001; week 12: 16.57 µg/mL IQR 11.97–19.37 vs. 7.41 µg/mL IQR 3.07–12.22, p=0.0005) | Quality in Prognosis Studies Tool (QUIPS) | 1.Study participation: moderate<br>2.Attrition: high<br>3.Prognostic factor: ?<br>4.Outcome: Low<br>5.Confounding: high<br>6.Statistics: low        |
| Rosas 2017        | Cross-sectional study, monocentric, Spain                      | AS adalimumab | To determine whether obesity affects serum levels of adalimumab              | 57 pts, male 65%, age 47 years, BMI 27.6, disease duration 9.8 years, HLAB27 77%, treatment duration 1.44 years, | N/A       | adalimumab level, antibodies             | When the groups of patients with and without positive anti-ADA antibodies (n=4, 7%) were compared, patients with positive antibodies showed a significantly lower mean ADA concentration (<0.024 vs. 8.0 [4.3] mg/L, p<0.001)                                                                                                                                                         | Quality in Prognosis Studies Tool (QUIPS) | 1.Study participation: low<br>2.Attrition: high<br>3.Prognostic factor: moderate<br>4.Outcome: Low<br>5.Confounding: high<br>6.Statistics: moderate |

|                    |                                                                         |                               |                                                                         |                                                                                                                       |           |                                  |                                                                                                                                                                                                                                                                                                                                                                                                                                           |                                           |                                                                                                                                                                  |
|--------------------|-------------------------------------------------------------------------|-------------------------------|-------------------------------------------------------------------------|-----------------------------------------------------------------------------------------------------------------------|-----------|----------------------------------|-------------------------------------------------------------------------------------------------------------------------------------------------------------------------------------------------------------------------------------------------------------------------------------------------------------------------------------------------------------------------------------------------------------------------------------------|-------------------------------------------|------------------------------------------------------------------------------------------------------------------------------------------------------------------|
|                    |                                                                         |                               |                                                                         | BASDAI4.05,<br>ASDAS(esr) 2.36                                                                                        |           |                                  |                                                                                                                                                                                                                                                                                                                                                                                                                                           |                                           |                                                                                                                                                                  |
| Kneepkens 2015 (2) | Prospective observational cohort, multicentric, the Netherlands, Taiwan | AS ADA                        | Association between drug level and clinical response                    | 151 pts, 42 years, 68% male, disease duration 8 years, HLAB27 83%, ASDAS 3.5, BASDAI 6.4, NSAIDs 65%                  | 24 weeks  | drug levels, antibodies          | Adalimumab levels were significantly different for patients without and with antibodies: 12.7 (8.2-18) and 1.2 (0-2.0), respectively (p<0.001).                                                                                                                                                                                                                                                                                           | Quality in Prognosis Studies Tool (QUIPS) | 1.Study participation: moderate<br>2.Attrition: moderate<br>3.Prognostic factor: moderate<br>4.Outcome: moderate<br>5.Confounding: moderate<br>6.Statistics: low |
| Van Kuijk 2010     | Prospective observational cohort, monocentric, the Netherlands          | PSA, adalimumab               | Relationship between clinical response and serum levels                 | 22 pts, male 14/8, age 43 years, disease duration 6.3 years, MTX 55%, DAS28 4.9, PASI 5.7                             | 12 months | Drug level, anti-drug antibodies | Patients with anti-adalimumab antibodies had lower median adalimumab concentrations than those without: 1.7 vs 8.1 mg/l (p=0.007) at 3 months, and 1.7 vs 9.8 mg/l (p=0.031) at 12 months.                                                                                                                                                                                                                                                | Quality in Prognosis Studies Tool (QUIPS) | 1.Study participation: high<br>2.Attrition: high<br>3.Prognostic factor: moderate<br>4.Outcome: Low<br>5.Confounding: high<br>6.Statistics: low                  |
| Vogelzang 2014     | Prospective observational cohort, monocentric, the Netherlands          | PSA, adalimumab               | Association between adalimumab drug levels and disease activity         | 103 pts, male 53%, age 50 years, MTX 78%, disease duration 6 years, DAS28 4.0, PASI 0.6                               | 52 weeks  | Drug level, anti-drug antibodies | At week 28, patients who had detectable ADA had significant lower median adalimumab concentrations: 1.3 mg/L (0.0–3.2 IQR) compared with 8.7 mg/L (5.7–11.5 IQR) in patients without ADA, p<0.001. At 52 weeks median adalimumab concentration in patients with detectable ADA, was significantly lower (p=0.0001) than in patients without detectable ADA (respectively, median 0.9 mg/L, IQR 0.0–2.9 vs median 9.4 mg/L, IQR 5.7–12.1). | Quality in Prognosis Studies Tool (QUIPS) | 1.Study participation: high<br>2.Attrition: high<br>3.Prognostic factor: low<br>4.Outcome: Low<br>5.Confounding: high<br>6.Statistics: low                       |
| <b>INFLIXIMAB</b>  |                                                                         |                               |                                                                         |                                                                                                                       |           |                                  |                                                                                                                                                                                                                                                                                                                                                                                                                                           |                                           |                                                                                                                                                                  |
| Dervieux 2012      | Cross-sectional study                                                   | RA IFX (median 6 mg/kg/8 wks) | Correlation between drug level, MTX polyglutamates and disease activity | 61 pts, 64 years, 77% female, disease duration 11 years, MTX dose 15 (10-20) mg, treatment duration 70 months, CDAI 8 | N/A       | Drug level, anti-drug antibodies | Patients with anti-drug antibodies (n=11, 18%) had lower IFX levels than patients without antibodies (median 5.0 vs. <0.5 ug/ml, p<0.001).                                                                                                                                                                                                                                                                                                | Quality in Prognosis Studies Tool (QUIPS) | 1.Study participation: moderate<br>2.Attrition: ?<br>3.Prognostic factor: ?<br>4.Outcome: Low<br>5.Confounding: high<br>6.Statistics: low                        |
| <b>ETANERCEPT</b>  |                                                                         |                               |                                                                         |                                                                                                                       |           |                                  |                                                                                                                                                                                                                                                                                                                                                                                                                                           |                                           |                                                                                                                                                                  |

|                                                                |                                                             |                |                                                                                            |                                                                                                                                                                          |           |                                          |                                                                                                                                                                                                                                                                                                                                                                                                                                                                                                                                                                                                                                                                          |                                           |                                                                                                                                                                                                                                          |
|----------------------------------------------------------------|-------------------------------------------------------------|----------------|--------------------------------------------------------------------------------------------|--------------------------------------------------------------------------------------------------------------------------------------------------------------------------|-----------|------------------------------------------|--------------------------------------------------------------------------------------------------------------------------------------------------------------------------------------------------------------------------------------------------------------------------------------------------------------------------------------------------------------------------------------------------------------------------------------------------------------------------------------------------------------------------------------------------------------------------------------------------------------------------------------------------------------------------|-------------------------------------------|------------------------------------------------------------------------------------------------------------------------------------------------------------------------------------------------------------------------------------------|
| Dong 2019                                                      | Prospective observational cohort, monocentric, China        | AS etanercept  | To investigate the effective serum level of etanercept in patients with AS                 | 60 pts, 54/60 male, age 29 years, disease duration 4 years                                                                                                               | 24 weeks  | drug levels, anti-drug antibodies        | <p>Cut-off drug level values of effective (ASDAS-CRP &lt; 2.1) etanercept treatment based on results of ROC curves at weeks 4, 12, and 24 were 2.32, 2.12, and 2.36 µg/mL, respectively.</p> <p>Etanercept levels were significantly higher in patients who were antibody-negative than those who were antibody-positive at weeks 4, 12, and 24, respectively (2.46 ± 0.63 vs 1.97 ± 0.98 µg/mL, p = 0.044; 2.55 ± 0.94 vs 2.10 ± 0.58 µg/mL, p=0.023 and 2.85±1.09 vs 2.22±0.74 µg/mL, p= 0.042)</p>                                                                                                                                                                    | Quality in Prognosis Studies Tool (QUIPS) | <ol style="list-style-type: none"> <li>1.Study participation: moderate</li> <li>2.Attrition: high</li> <li>3.Prognostic factor: moderate</li> <li>4.Outcome: Low</li> <li>5.Confounding: high</li> <li>6.Statistics: moderate</li> </ol> |
| <b>CERTOLIZUMAB</b>                                            |                                                             |                |                                                                                            |                                                                                                                                                                          |           |                                          |                                                                                                                                                                                                                                                                                                                                                                                                                                                                                                                                                                                                                                                                          |                                           |                                                                                                                                                                                                                                          |
| Jani 2017                                                      | Prospective observational cohort (BRAGGSS) multicentric, UK | RA CZP         | Association between random certolizumab levels, antidrug antibodies and treatment response | 115 pts, age 58 years, female 70%, disease duration 7 years, DAS28 5.9 MTX use 53%                                                                                       | 12 months | Random drug levels, anti-drug antibodies | <p>Antidrug antibodies levels were strongly correlated (in multivariate analysis) with drug levels. -0.044 (-0.059 – -0.028), p&lt;0.0001.</p> <p>The presence of antibodies was significantly associated with lower drug levels over 12 months using GEE (β=-0.037, 95% CI -0.055 to -0.018, p&lt;0.0001).</p>                                                                                                                                                                                                                                                                                                                                                          | Quality in Prognosis Studies Tool (QUIPS) | <ol style="list-style-type: none"> <li>1.Study participation: low</li> <li>2.Attrition: moderate</li> <li>3.Prognostic factor: low</li> <li>4.Outcome: Low</li> <li>5.Confounding: low</li> <li>6.Statistics: low</li> </ol>             |
| <b>RHEUMATOID ARTHRITIS AND TNF-INHIBITORS (ADA, IFX, ETN)</b> |                                                             |                |                                                                                            |                                                                                                                                                                          |           |                                          |                                                                                                                                                                                                                                                                                                                                                                                                                                                                                                                                                                                                                                                                          |                                           |                                                                                                                                                                                                                                          |
| Chen 2015 (2)                                                  | Observational cohort, Taiwan                                | RA ADA and ETN | Association between drug levels and therapeutic response                                   | <p>ADA 36 pts, 53 years, 89% female, disease duration 5.4 years, DAS28 6.1, MTX 89% ETN 34 pts, 58 years, 88% female, disease duration 5.4 years, DAS28 5.95 MTX 88%</p> | 12 months | Anti-drug antibodies and drug level      | <p>Adalimumab: patients with negative antibodies had significantly higher drug levels at 6 and 12 months, median 4.25 and 4.19 ug/ml, respectively vs. 0.51 and 0.35 ug/ml, respectively, for those with positive antibodies (measured with ELISA) (p&lt;0.001 for both).</p> <p>There was an inverse correlation between antibody levels (bridging ELISA) and drug trough levels (Progenika) (r=-0.667, p&lt;0.001; r= -0.575, p&lt;0.001, at the 6th and 12th month, respectively).</p> <p>Similarly, there was an inverse correlation between antibody levels (RIA) and drug trough levels (Sanquin) at the 12 months of anti-TNF therapy (r=-0.612, p&lt;0.001).</p> | Quality in Prognosis Studies Tool (QUIPS) | <ol style="list-style-type: none"> <li>1.Study participation: high</li> <li>2.Attrition: high</li> <li>3.Prognostic factor: ?</li> <li>4.Outcome: Low</li> <li>5.Confounding: high</li> <li>6.Statistics: low</li> </ol>                 |

|            |                                                             |                                          |                                                                                                                                                   |                                                                                                                                                                                                                                                                     |           |                                                            |                                                                                                                                                                                                                                                                                                                                                                                                                                                                                                                                      |                                           |                                                                                                                                                                  |
|------------|-------------------------------------------------------------|------------------------------------------|---------------------------------------------------------------------------------------------------------------------------------------------------|---------------------------------------------------------------------------------------------------------------------------------------------------------------------------------------------------------------------------------------------------------------------|-----------|------------------------------------------------------------|--------------------------------------------------------------------------------------------------------------------------------------------------------------------------------------------------------------------------------------------------------------------------------------------------------------------------------------------------------------------------------------------------------------------------------------------------------------------------------------------------------------------------------------|-------------------------------------------|------------------------------------------------------------------------------------------------------------------------------------------------------------------|
| Jani 2015  | Prospective observational cohort (BRAGGSS) multicentric, UK | RA ADA, ETN                              | Random drug levels, clinical response and adherence to therapy                                                                                    | ADA 160 pts, age 56.2 years, 70% female, disease duration 8.6 years, DAS28 5.7, MTX 55%.<br><br>ETN 171 pts, 57 years, 80% female, disease duration 7.8 years, DAS28 5.9, MTX 46%                                                                                   | 12 months | Random drug levels, anti-drug antibodies                   | Presence of antidrug antibodies was significantly associated with lower adalimumab levels ( $r = -0.51$ $p < 0.0001$ ).<br><br>Median Adalimumab levels for anti-drug antibodies positive vs. negative patients at 3, 6 and 12 months of treatment, respectively, were 4.6, 2.1 and 1.7 ug/ml vs. 12.0, 12.0 and 12.0 ug/ml (no statistics).<br><br>In analysis for predictors of low drug levels, for adalimumab, anti-drug antibodies remained the strongest predictor (regression coefficient 1.27 95%CI 0.44-2.09 $p = 0.003$ ). | Quality in Prognosis Studies Tool (QUIPS) | 1.Study participation: moderate<br>2.Attrition: moderate<br>3.Prognostic factor: moderate<br>4.Outcome: moderate<br>5.Confounding: moderate<br>6.Statistics: low |
| Eng 2015   | Cross-sectional, multicentric, DANBIO registry              | RA, ADA and IFX                          | Evaluation of correlation between anti-drug antibodies and drug levels in patients with clinical remission (DAS28(CRP) <2.6) at time of inclusion | IFX 44 pts, age 63 years, female 61%, DAS28 1.6, MTX 89%, disease duration 11 years, treatment 55 months, remission 17 months.<br><br>ADA 49 pts, age 54 years, female 57%, DAS28 1.6, MTX 82%, disease duration 16 years, treatment 68 months, remission 20 months | N/A       | Serum levels in patients with and without antibodies (RIA) | Median drug levels for IFX in antibody positive (n=8, 18%) were 1.6 ug/ml, and for antibody negative patients 4.7 ug/ml ( $p = 0.048$ )<br><br>Median drug levels for ADA antibody positive patients (n=1, 2%) 0.7 ug/ml, and for antibody negative patients 9.7 ug/ml (no statistics)                                                                                                                                                                                                                                               | Quality in Prognosis Studies Tool (QUIPS) | 1.Study participation: low<br>2.Attrition: ?<br>3.Prognostic factor: ?<br>4.Outcome: Low<br>5.Confounding: high<br>6.Statistics: moderate                        |
| Moots 2017 | Cross-sectional study, multinational                        | RA adalimumab, etanercept and infliximab | Relationship of anti-drug antibodies and efficacy and patient reported outcome with drug levels                                                   | ETN n=200, age 57 years, female 78%, treatment duration 14.6 months, MTX 61.5%<br><br>ADA n=199, age 54 years, female                                                                                                                                               | N/A       | Drug level, anti-drug antibodies                           | The mean ( $\pm$ SD) serum trough ETN concentration was 1.8 (1.03) ug/ml; the effect of anti-drug antibodies on serum trough drug concentration could not be determined for patients treated with ETN since no patient was positive for anti-drug antibodies.<br><br>For adalimumab, patients without detectable anti-drug antibodies, mean drug concentration was 7.7 mg/ml, vs. 1.5 mg/ml for patients with detectable antibodies                                                                                                  | Quality in Prognosis Studies Tool (QUIPS) | 1.Study participation: moderate<br>2.Attrition: high<br>3.Prognostic factor: ?<br>4.Outcome: moderate<br>5.Confounding: high<br>6.Statistics: low                |

|                                                             |                                                                 |                            |                                                                                                |                                                                                                                                                     |           |                                                     |                                                                                                                                                                                                                                                                                                                                                                                                                                                                                                                                                                                                                            |                                           |                                                                                                                                                      |
|-------------------------------------------------------------|-----------------------------------------------------------------|----------------------------|------------------------------------------------------------------------------------------------|-----------------------------------------------------------------------------------------------------------------------------------------------------|-----------|-----------------------------------------------------|----------------------------------------------------------------------------------------------------------------------------------------------------------------------------------------------------------------------------------------------------------------------------------------------------------------------------------------------------------------------------------------------------------------------------------------------------------------------------------------------------------------------------------------------------------------------------------------------------------------------------|-------------------------------------------|------------------------------------------------------------------------------------------------------------------------------------------------------|
|                                                             |                                                                 |                            |                                                                                                | 81%, treatment duration 13.5 months, MTX 70%<br><br>IFX n=196, age 61 years, female<br>80%, treatment duration 13.1 months, MTX 64%                 |           |                                                     | (p<0.0001).<br>For infliximab, patients without detectable anti-drug antibodies, mean drug concentration was 9.8 mg/ml, vs. 0.2 mg/ml for patients with detectable antibodies (p=0.0003).                                                                                                                                                                                                                                                                                                                                                                                                                                  |                                           |                                                                                                                                                      |
| <b>SPONDYLARTHROSIS AND TNF-INHIBITORS (ADA, IFX, ETN)</b>  |                                                                 |                            |                                                                                                |                                                                                                                                                     |           |                                                     |                                                                                                                                                                                                                                                                                                                                                                                                                                                                                                                                                                                                                            |                                           |                                                                                                                                                      |
| Arends 2010                                                 | Longitudinal observational cohort, monocentric, the Netherlands | AS, ADA, IFX ETN           | Association drug level and disease activity                                                    | 20 pts per drug (total 60 pts)<br>age 42 63% male, disease duration 8 years, 84% HLA-B27+, DMARDs 23%, baseline BASDAI 5.9, CRP 17 ESR 25 ASDAS 3.8 | 12 months | drug level, antibodies                              | Serum levels at 3, 6 and 12 months were 30.6, 36.3 and 23.4 for IFX, 3.1, 2.8 and 2.9 for ETN and 5.7, 5.5 and 8.0 for ADA, respectively.<br><br>Patients with antibodies had lower drug levels than patients without. For IFX: 0.1, 0.0 and 0.6 ug/ml at 3, 6 and 12 months, respectively, for patients with detectable antibodies and 20.3, 30.7 and 15.1 ug/ml for patients without antibodies. (p<0,05 at 6 & 12 months)<br><br>For ADA: 1.5, 1.5 and 0.0 ug/ml for patients with and 6.4, 6.8 and 8.0 ug/ml for patients without detectable antibodies at 3, 6 and 12 months, respectively (p<0,05 at 6 & 12 months). | Quality in Prognosis Studies Tool (QUIPS) | 1.Study participation: moderate<br>2.Attrition: high<br>3.Prognostic factor: high<br>4.Outcome: Low<br>5.Confounding: high<br>6.Statistics: moderate |
| Ancuta SAT0277 (2018)                                       | Abstract EULAR 2018, cross-sectional                            | axSpA IFX ADA ETN          | To evaluate the immunogenicity of TNF inhibitors and the potential effect on serum drug levels | ADA: 28 pts<br>IFX: 19 pts<br>ETA: 40 pts                                                                                                           | N/A       | Drug level, anti-drug antibodies (ELISA, Progenika) | 11 patients had detectable anti-drug antibodies, 8 under ADA (28.57%) and 3 under IFX (15.78%), with significant decrease in drug levels (3.97 µg/mL vs. 0.07 µg/mL ADA, p<0.05; 1.82 µg/mL vs. 0.05 µg/mL IFX, p<0.05)                                                                                                                                                                                                                                                                                                                                                                                                    | Quality in Prognosis Studies Tool (QUIPS) | 1.Study participation: high<br>2.Attrition: high<br>3.Prognostic factor: high<br>4.Outcome: moderate<br>5.Confounding: high<br>6.Statistics: high    |
| <b>RA, SpA AND TNF-INHIBITORS (ADA, IFX, ETN, CPZ, GLM)</b> |                                                                 |                            |                                                                                                |                                                                                                                                                     |           |                                                     |                                                                                                                                                                                                                                                                                                                                                                                                                                                                                                                                                                                                                            |                                           |                                                                                                                                                      |
| Gehin 2019                                                  | Observational cohort (NOR-DMARD), multicentric, Norway          | RA, SpA, PsA, certolizumab |                                                                                                |                                                                                                                                                     | 6 months  | Drug level, anti-drug antibodies                    | Stratified by diagnosis, median (IQR) CZP level was 35.0 (21.3–45.3) mg/L in axSpA patients, 34.7 (17.6–44.6) mg/L in RA and 31.0 (13.6–39.9) mg/L in PsA.<br><br>Anti-drug antibody-positive patients had significantly lower CZP levels than antibody-negative patients, i.e.,                                                                                                                                                                                                                                                                                                                                           | Quality in Prognosis Studies Tool         | 1.Study participation: low<br>2.Attrition: high<br>3.Prognostic factor: low<br>4.Outcome: low<br>5.Confounding: high<br>6.Statistics: low            |

|                          |                                                              |                                           |                                                                                                                              |                                                                                                                                                     |                                                        |                                                                |                                                                                                                                                                                                                                                                                                          |                                   |                                                                                                                                                                                |
|--------------------------|--------------------------------------------------------------|-------------------------------------------|------------------------------------------------------------------------------------------------------------------------------|-----------------------------------------------------------------------------------------------------------------------------------------------------|--------------------------------------------------------|----------------------------------------------------------------|----------------------------------------------------------------------------------------------------------------------------------------------------------------------------------------------------------------------------------------------------------------------------------------------------------|-----------------------------------|--------------------------------------------------------------------------------------------------------------------------------------------------------------------------------|
|                          |                                                              |                                           |                                                                                                                              |                                                                                                                                                     |                                                        |                                                                | median (IQR) 1.0 (0.2–6.8) vs. 34.4 (21.2–44.7) mg/L (p < 0.01).                                                                                                                                                                                                                                         |                                   |                                                                                                                                                                                |
| Chen 2015 (1)            | Observational cohort, Taiwan                                 | RA AS GLM                                 | Association between GLM levels and anti-drug antibodies                                                                      | RA 33 pts, 88-100% female, disease duration 7 years, DAS28 6.27-6.51<br><br>AS 43 pts, 39 years, 77-91% male, BASDAI 6.3-6.5, ADASCRP 4, MTX 11-24% | 24 weeks                                               | GLM levels and anti-drug antibody status                       | Antibody positive RA patients (15%) had barely detectable drug levels (median 0.022 ug/ml) in contrast to antibody negative patients (median 1.05 ug/ml) (p<0.001)<br><br>No numbers for AS, since only one antibody positive patient                                                                    | Quality in Prognosis Studies Tool | 1.Study participation: high<br>2.Attrition: ?<br>3.Prognostic factor: moderate<br>4.Outcome: low<br>5.Confounding: high<br>6.Statistics: moderate                              |
| <b>OTHER BIOLOGICALS</b> |                                                              |                                           |                                                                                                                              |                                                                                                                                                     |                                                        |                                                                |                                                                                                                                                                                                                                                                                                          |                                   |                                                                                                                                                                                |
| Wells 2019               | Open label, randomised study, multicenter                    | RA, sarilumab 150 or 200 mg every 2 weeks | Assess immunogenicity of sarilumab in RA                                                                                     | 132 pts (65 with 150mg, 67 with 200) ; 80% female ; Age 52,4 ; duration disease 10,5y ; DAS28 5,9                                                   | 30 weeks: 24 weeks of treatment + 6 weeks of follow-up | Anti-drug antibodies, drug level                               | Mean (standard deviation) sarilumab concentrations at steady state (week 12) in antibody-negative and antibody-positive patients were 5.36 (SD 6.25 [n = 41]) and 2.10 (SD 2.76 [n = 13]) at 150 mg q2w and 15.62 (13.95 [n = 45]) and 9.39 (9.26 [n = 10]) at 200 mg q2w, respectively. (no statistics) | Cochrane RoB2 for RCT             | Overall: some concerns<br><br>Randomisation: Low<br>Intervention: some concerns<br>Missing outcome data: Low<br>Outcome measurement: some concerns<br>Selective reporting: Low |
| Thurlings 2010           | Perspective observational cohort, bicentric, the Netherlands | RA, rituximab (2x 1000 mg)                | Whether persistence of synovial B lineage cells and lack of clinical response are associated with low rituximab serum levels | 58pts, female 71-80%, DAS28 6.0-6.5, MTX 75-100%                                                                                                    | 24 weeks                                               | drug levels at week 4, 12/16 and 24, anti-rituximab antibodies | Rituximab levels in anti-drug antibody-positive patients were lower than in antibody-negative patients, from 4 weeks after treatment (p=0.003, p=0.096, p=0.001 and p,0.001 after 4, 12, 16 and 24 weeks, respectively.                                                                                  | Quality in Prognosis Studies Tool | 1.Study participation: high<br>2.Attrition: high<br>3.Prognostic factor: high<br>4.Outcome: high<br>5.Confounding: high<br>6.Statistics: moderate                              |

**PTC-11:** Measurement of ADAb should be considered in the case of a hypersensitivity reaction, mainly related to infusions.

| Study                            | Study design                      | Population                                 | Scope/Intervention                                                                                                                                                                                                                                            | Study population                                                                                           | Follow-up                                  | Outcome measures   | Results                                                                                                                                                                                                                                                                                                                                                                                                                                                                                                                                                              | Tool used for RoB assessment      | Risk of Bias                                                                                                                                                                                                                     |
|----------------------------------|-----------------------------------|--------------------------------------------|---------------------------------------------------------------------------------------------------------------------------------------------------------------------------------------------------------------------------------------------------------------|------------------------------------------------------------------------------------------------------------|--------------------------------------------|--------------------|----------------------------------------------------------------------------------------------------------------------------------------------------------------------------------------------------------------------------------------------------------------------------------------------------------------------------------------------------------------------------------------------------------------------------------------------------------------------------------------------------------------------------------------------------------------------|-----------------------------------|----------------------------------------------------------------------------------------------------------------------------------------------------------------------------------------------------------------------------------|
| <b>Burmester GR. et al, 2017</b> | Post-hoc analysis of several RCT  | RA pts treated with TCZ                    | Measurement of ADAb (by bELISA, specific detection)                                                                                                                                                                                                           | 8974 pts from the different RCT                                                                            | TCZ-SC (up to 3.5yr)<br>TCZ-IV (up to 5yr) | Adverse effects    | <p>Incidence of ADAb:</p> <ul style="list-style-type: none"> <li>- 1.5% (n=47) pts who received TCZ-SC developed ADAb</li> <li>- 1.2% (n=69) pts who received TCZ-IV developed ADAb</li> </ul> <p>There was no clear impact of ADAb and safety (very low incidence of infusion reactions, hypersensitivity, injection-site reactions):</p> <ul style="list-style-type: none"> <li>- Hypersensitivity (leading to withdrawal): TCZ-SC=0.03%; TCZ-IV=0.2%</li> <li>- Injection-site reactions: TCZ-SC=0.1%</li> </ul> <p>Results were not adjusted for confounders</p> | AMSTAR-2                          | <p>HIGH</p> <p>3x YES<br/>3x <i>partial</i>-YES<br/>9x NO<br/>1x N/A</p>                                                                                                                                                         |
| <b>Arstikyte I. et al, 2015</b>  | Retrospective observational study | Pts RA or SpA treated with ADA, IFX or ETN | Measurement of ADAb (Sandwich ELISA: specific detection)<br>Blood samples collected at:<br>IFX: at 42 (12-66) months after treatment initiation<br>ADA: at 6 (3-18) months after treatment initiation<br>ETN: at 30 (12-54) months after treatment initiation | 143 pts (62 with RA and 81 with SpA).<br>AdA: 25 pts (17.4%)<br>ETN: 61 pts (42.7%)<br>IFX: 57 pts (39.9%) | 2 years                                    | Infusion reactions | <p>ADAb development: 14 by IFX, 1 by ADA, 0 by ETN<br/><u>IFX</u></p> <p>Association between ADAb and infusion reaction: OR 5.88 (95% CI 1.04-33.28); p&lt;0.05</p> <p>Results were not adjusted for confounders</p>                                                                                                                                                                                                                                                                                                                                                 | Quality in Prognosis Studies Tool | <ol style="list-style-type: none"> <li>1.Study participation: high</li> <li>2.Attrition: high</li> <li>3.Prognostic factor: high</li> <li>4.Outcome: low</li> <li>5.Confounding: high</li> <li>6.Statistics: moderate</li> </ol> |

|                                       |                                   |                                         |                                                                                                              |         |                   |                                                      |                                                                                                                                                                                                                                                                                                                                                                                                                                                                                                                                                                                                                                                                                                                                                                                                                                                                                                                     |                                     |                                                                                               |
|---------------------------------------|-----------------------------------|-----------------------------------------|--------------------------------------------------------------------------------------------------------------|---------|-------------------|------------------------------------------------------|---------------------------------------------------------------------------------------------------------------------------------------------------------------------------------------------------------------------------------------------------------------------------------------------------------------------------------------------------------------------------------------------------------------------------------------------------------------------------------------------------------------------------------------------------------------------------------------------------------------------------------------------------------------------------------------------------------------------------------------------------------------------------------------------------------------------------------------------------------------------------------------------------------------------|-------------------------------------|-----------------------------------------------------------------------------------------------|
| <b>Krintel SB. et al, 2013</b>        | Prospective observational study   | TNFi naïve pts with RA treated with IFX | Measurement of ADAb after 6, 14 and 52 weeks (biochip platform: specific capture but non-specific detection) | 218 pts | 52 weeks          | Risk of withdrawal due to adverse drug reactions     | <p>ADAb+ : 118/218 pts</p> <p>- ADAb+ pts after 6 weeks of treatment had an increased risk of withdrawal due to adverse drug reactions during the 52-week follow-up compared with ADAb- pts (HR = 5.06, 95% CI 2.36-10.84; P &lt; 0.0001).</p> <p>- ADAb+ pts after 14 weeks of treatment had an increased risk of withdrawal due to adverse drug reactions during the 52-week follow-up compared with ADAb- pts (HR = 3.30, 95% CI 1.56-6.99; P = 0.0009).</p> <p>- ADAb+ pts during the 52-week follow-up had an increased risk of adverse drug reactions compared with ADAb- pts [21 (18%) vs 7 (7%), P &lt; 0.018].</p> <p>- ADAb+ pts during the 52-week follow-up had an increased risk of infusion reactions [17 (14%) vs 0 (0%), P &lt; 0.001]. 12/17 pts (71%) who withdrew due to infusion reactions had detectable ADAb after 6 weeks of treatment.</p> <p>Results were not adjusted for confounders</p> | Newcastle-Ottawa for cohort studies | <p>Sum score: **, -, *</p> <p>Selection: **</p> <p>Comparability: -</p> <p>Outcome: *</p>     |
| <b>Plasencia C. et al, 2012</b>       | Ambispective observational study  | Pts with SpA treated with IFX           | Measurement of ADAb (by bELISA, specific detection)                                                          | 94 pts  | A mean of 7 years | Association of ADAb With Safety                      | <p>-ADAb associated with hypersensitivity reactions: OR(95%CI)=17(3.29-87.85)</p> <p>-Infusion-related reactions were seen in 11/94 pts, most of whom had detectable ADAb (8 (72.7%) vs 3 (27.3%), p=0.001). ADAb levels (median, IQR) at the times of the infusion reactions were significantly higher in the patients who developed infusion reactions (12931, 853-82437 AU/ml vs 2454, 449-7718 AU/ml; p=0.028). OR(95%CI)=11.2(3.8-40.9), p&lt;0.001.</p> <p>Results were not adjusted for confounders</p>                                                                                                                                                                                                                                                                                                                                                                                                      | Newcastle-Ottawa for cohort studies | <p>Sum score: ***, -, **</p> <p>Selection: ***</p> <p>Comparability: -</p> <p>Outcome: **</p> |
| <b>Pascual-Salcedo D. et al, 2011</b> | Retrospective observational study | Pts with RA treated with IFX            | Measurement of ADAb (by bELISA, specific detection)                                                          | 85 pts  | >4years           | Relation between infusion-related reactions and ADAb | <p>9 (10.5%) pts, all of them with high-serum ADAb levels, developed infusion-related reactions. ADAb levels at the time of infusion reaction were higher in the patients who developed reactions (20565 AU/ml) than in those patients with detectable ADA, but without infusion related reactions [10152 AU/ml]; p=0.041.</p> <p>Results were not adjusted for confounders</p>                                                                                                                                                                                                                                                                                                                                                                                                                                                                                                                                     | Newcastle-Ottawa for cohort studies | <p>Sum score: ***, -, **</p> <p>Selection: ***</p> <p>Comparability: -</p> <p>Outcome: **</p> |

|                                 |                                                                                                           |                                                                                                                                  |                                                                                                                   |         |          |                                        |                                                                                                                                                                                                                                                        |                                     |                                                                                                                                                                                |
|---------------------------------|-----------------------------------------------------------------------------------------------------------|----------------------------------------------------------------------------------------------------------------------------------|-------------------------------------------------------------------------------------------------------------------|---------|----------|----------------------------------------|--------------------------------------------------------------------------------------------------------------------------------------------------------------------------------------------------------------------------------------------------------|-------------------------------------|--------------------------------------------------------------------------------------------------------------------------------------------------------------------------------|
| <b>De Vries MK. et al, 2009</b> | Prospective observational study                                                                           | Pts with AS treated with ADA                                                                                                     | Measurement of ADAb (by RIA, specific detection)                                                                  | 35 pts  | 6 months | Association of ADAb With Safety        | 31% (11/35) of patients developed ADAb within 6 months of treatment. 1 of them had an allergic reaction with flushing, dyspnea and undetectable serum ADA levels. OR(95%IC)=7.00(0.26-186.26); p>0.05<br><br>Results were not adjusted for confounders | Newcastle-Ottawa for cohort studies | Sum score: ***, -, ***<br><br>Selection: ***<br>Comparability: -<br>Outcome: ***                                                                                               |
| <b>Braun J. et al, 2008</b>     | RCT<br>A placebo controlled, double-blind trial                                                           | Pts with AS treated with IFX                                                                                                     | Measurement of IFX and antibodies-to-IFX at baseline and after 1.5, 3 and 6 months                                | 277 pts | 2 years  | Safety of IFX                          | 61% of ADAb+ pts developed infusion reactions. ADAb associated with hypersensitivity reactions: OR(95%IC)=9.64(3.84-24.25)<br><br>Results were not adjusted for confounders                                                                            | Cochrane RoB2 for RCT               | Overall: some concerns<br><br>Randomisation: Low<br>Intervention: low<br>Missing outcome data: Low<br>Outcome measurement: some concerns<br>Selective reporting: some concerns |
| <b>Bender NK. et al. 2007</b>   | Prospective observational study                                                                           | Pts with RA treated with ADA                                                                                                     | Measurement of ADAb (by bELISA, specific detection).                                                              | 15 pts  | 72 weeks | Correlation of ADAb and adverse events | 2/15 patients (with ADAb) developed exantheme. ADAb associated with hypersensitivity reactions: OR(95%IC)=0.18(0.01-4.26), p>0.05<br><br>Results were not adjusted for confounders                                                                     | Newcastle-Ottawa for cohort studies | Sum score: **, -, *<br><br>Selection: **<br>Comparability: -<br>Outcome: *                                                                                                     |
| <b>Abe T et al. 2006</b>        | RCT<br>A placebo controlled, double-blind trial (the first 14 weeks) + open label trial (during 32 weeks) | Placebo and Pts with RA treated with IFX (during the double-blind trial: 3mg/kg or 10mg/kg; during the open label trial: 3mg/kg) | Measurement of ADAb (by RIA, specific detection) at baseline, at 14 weeks and at 20 weeks after the last infusion | 129 pts | 32 weeks | Safety of IFX                          | ADAb associated with hypersensitivity reactions: OR(95%IC)=1.31(0.64-2.69), p>0.05<br><br>Results were not adjusted for confounders                                                                                                                    | Cochrane RoB2 for RCT               | Overall: high<br><br>Randomisation: Low<br>Intervention: high<br>Missing outcome data: Low<br>Outcome measurement: some concerns<br>Selective reporting: high                  |

|                                |                                   |                                              |                                                                                            |                        |           |                                            |                                                                                                                                                                                                                                                                                                                                                                |                                     |                                                                                                                                                |
|--------------------------------|-----------------------------------|----------------------------------------------|--------------------------------------------------------------------------------------------|------------------------|-----------|--------------------------------------------|----------------------------------------------------------------------------------------------------------------------------------------------------------------------------------------------------------------------------------------------------------------------------------------------------------------------------------------------------------------|-------------------------------------|------------------------------------------------------------------------------------------------------------------------------------------------|
| <b>Bendtzen K. et al, 2006</b> | Retrospective observational study | Pts with RA treated with IFX (naïve to TNFi) | Measurement of ADAb (by RIA, specific detection) at baseline and after 1.5, 3 and 6 months | 106 consecutive RA pts | >6 months | Discontinuation of therapy                 | 30% of pts developed ADAb at 3 months. 22/106 (20%) pts discontinued therapy due to infusion reaction (within 18 months). Early formation of ADAb (3 months) was associated with subsequent discontinuation of therapy due to infusion reaction (within 18 months): p=0.001 OR(95%IC)=2.96(1.16-7.77); p<0.05<br><br>Results were not adjusted for confounders | Newcastle-Ottawa for cohort studies | Sum score: **, -, *<br><br>Selection: **<br>Comparability: -<br>Outcome: *                                                                     |
| <b>Wolbink GJ. et al, 2006</b> | prospective observational study   | Pts with RA treated with IFX                 | Measurement of ADA (by RIA, specific detection)                                            | 51 pts                 | 1 year    | Association of ADA with infusion reactions | 22/51 pts developed ADA within 1 year of treatment. 3 pts developed infusion reactions (these 3 pts also developed ADA). OR(95%IC)=10.59(0.52-216.54); p>0.05<br><br>Results were not adjusted for confounders                                                                                                                                                 | Quality in Prognosis Studies Tool   | 1.Study participation: moderate<br>2.Attrition: high<br>3.Prognostic factor: low<br>4.Outcome: low<br>5.Confounding: high<br>6.Statistics: low |

**PTC-12:** Measurement of ADAb is not recommended in the case of an injection-site reaction.

| Study                     | Study design                     | Population              | Scope/Intervention                                  | Study population                | Follow-up                                  | Outcome measures | Results                                                                                                                                                                                                                                                                                                                                                                                                                                                                                                                                                              | Tool used for RoB assessment | Risk of Bias                                                                                         |
|---------------------------|----------------------------------|-------------------------|-----------------------------------------------------|---------------------------------|--------------------------------------------|------------------|----------------------------------------------------------------------------------------------------------------------------------------------------------------------------------------------------------------------------------------------------------------------------------------------------------------------------------------------------------------------------------------------------------------------------------------------------------------------------------------------------------------------------------------------------------------------|------------------------------|------------------------------------------------------------------------------------------------------|
| Burmester GR. et al, 2017 | Post-hoc analysis of several RCT | RA pts treated with TCZ | Measurement of ADAb (by bELISA, specific detection) | 8974 pts from the different RCT | TCZ-SC (up to 3.5yr)<br>TCZ-IV (up to 5yr) | Adverse effects  | <p>Incidence of ADAb:</p> <ul style="list-style-type: none"> <li>- 1.5% (n=47) pts who received TCZ-SC developed ADAb</li> <li>- 1.2% (n=69) pts who received TCZ-IV developed ADAb</li> </ul> <p>There was no clear impact of ADAb and safety (very low incidence of infusion reactions, hypersensitivity, injection-site reactions):</p> <ul style="list-style-type: none"> <li>- Hypersensitivity (leading to withdrawal): TCZ-SC=0.03%; Tcz-IV=0.2%</li> <li>- Injection-site reactions: TCZ-SC=0.1%</li> </ul> <p>Results were not adjusted for confounders</p> | AMSTAR-2                     | <p><b>HIGH</b></p> <p><b>3x YES</b><br/><b>3x partial-YES</b><br/><b>9x NO</b><br/><b>1x N/A</b></p> |

**PTC-13:** Cost-effectiveness of TDM should be considered according to local context and standard of care.

| Study                  | Study design                                       | Population                             | Scope/Intervention                                                                                                                                                                                                                                                                                                                                                                                                                                                                                                                          | Study population                                                                         | Follow-up | Outcome measures                                          | Results                                                                                                                                                                                                                                                                                                                                                                                                                                                                                                                                                                                                                                                                                                                                                                    | Tool used for RoB assessment                 | Risk of Bias                              |
|------------------------|----------------------------------------------------|----------------------------------------|---------------------------------------------------------------------------------------------------------------------------------------------------------------------------------------------------------------------------------------------------------------------------------------------------------------------------------------------------------------------------------------------------------------------------------------------------------------------------------------------------------------------------------------------|------------------------------------------------------------------------------------------|-----------|-----------------------------------------------------------|----------------------------------------------------------------------------------------------------------------------------------------------------------------------------------------------------------------------------------------------------------------------------------------------------------------------------------------------------------------------------------------------------------------------------------------------------------------------------------------------------------------------------------------------------------------------------------------------------------------------------------------------------------------------------------------------------------------------------------------------------------------------------|----------------------------------------------|-------------------------------------------|
| Krieckaert et al, 2015 | Modeling approach (Markov Model) (The Netherlands) | RA<br>ADA                              | Modelling to evaluate the cost-effectiveness of personalized treatment based on clinical response and drug level compared to usual care.<br><br>Protocol, after 6 months of treatment :<br>A. EULAR good or moderate Response + DL <5mg/L : stop treatment<br>B. EULAR good or moderate Response + DL [5-12mg/L] : continue<br>C. EULAR good or moderate Response + DL >12mg/L : reduction of frequency<br>D. No EULAR Response + DL >5mg/L : other bDMARD (not Anti-TNFa)<br>E. No EULAR Response + DL <5mg/L : switch to another anti-TNF | 5000 simulations based on 272 patients, (81% female, mean age 54 (+/- 12); 74% MTX)      | 36 months | Quality Adjusted Life Years (QALYs), Costs                | 1. The simulations show a higher effectiveness for the cohort receiving personalized care. A personalized treatment permits a cost saving with a gain of QALYs in 72 % of simulations. The other 28% of simulations in this group were cost-savings but involve a loss of QALYs.<br><br>2. Considering a small loss of QALYs is usually acceptable, the probability of cost-effectiveness of personalized treatment was close to 100% versus usual care<br><br>3. For the whole cohort, after 3 years, the incremental cost effectiveness ratio was -666,541 euro per QALY gained using the societal perspective (- 2450.5 euro/patient, 816.8 euro/patient/year) and -646,266 euro per QALY from a healthcare perspective (- 2,376 euro/patient, - 792 euro/patient/year) | Consensus on health Economic Criteria (CHEC) | Moderate<br><br>14x Yes<br>5x No          |
| Jani et al, 2016       | Microcosting study (England)                       | All rheumatic diseases<br><br>Anti-TNF | To identify the direct medical costs associated with providing TNFi drug level and ADAb testing in clinical practice                                                                                                                                                                                                                                                                                                                                                                                                                        | Trough level analysis, in duplicate for each patient<br>Analysis of 40 samples per batch | /         | Cost of measurements /patient (both drug levels and ADAb) | Costs for monitoring one patient once by measurement of drug level and ADAb = £152.52/patient (147.68-159.24)<br><br>Incremental costs due to:<br><br>New appointment to acquire blood sample at trough level (67% of total cost ; £105.5/patient)<br><br>Consumables (ELISA kits, reagents, pipettes, well plates...) (23% of total cost ; £37.47/patient)                                                                                                                                                                                                                                                                                                                                                                                                                | Consensus on health Economic Criteria (CHEC) | Moderate<br><br>9x Yes<br>5x No<br>5x N/A |

|                   |                                                      |                 |                                                                                        |                                                                                                              |               |      |                                                                                                                                                                                                                                                                                                                                                                                                                                                                   |                                              |                          |
|-------------------|------------------------------------------------------|-----------------|----------------------------------------------------------------------------------------|--------------------------------------------------------------------------------------------------------------|---------------|------|-------------------------------------------------------------------------------------------------------------------------------------------------------------------------------------------------------------------------------------------------------------------------------------------------------------------------------------------------------------------------------------------------------------------------------------------------------------------|----------------------------------------------|--------------------------|
|                   |                                                      |                 |                                                                                        |                                                                                                              |               |      | Labour ( <i>work time of clerical assistant, medical lab assistant, biomedical scientist</i> ) (10% of total cost)                                                                                                                                                                                                                                                                                                                                                |                                              |                          |
| Laine et al, 2016 | Modeling approach (Markov Model) (Helsinki, Finland) | RA<br>ADA ; IFX | Cost estimation of drugs levels and ADAb combined measurement compared to non-testing. | 100 hypothetical patients per group<br>Simulation from database (1137 samples for IFX ; 436 samples for ADA) | 3 to 6 months | Cost | Cost of testing 100 patients = 20,000 Euro ( <i>each drug test costs 200 euro</i> )<br><br>In the non-testing cohort, ineffective treatment of 5 patients monitored every 3 months or 2,5 patients monitored every 6 months is estimated to cost 22,065 Euro<br><br>Based on the fact that TDM can prevent ineffective treatment, it can be cost-saving as soon as 2,5-5 /100 patients are treated non-optimally for 3-6 months ( $22,065 - 20,000 = 2,065$ euro) | Consensus on health Economic Criteria (CHEC) | High<br>6x Yes<br>13x No |

**abbreviations:**

ABT: abatacept; ACPA: anti-citrullinated protein antibody; ACR: American college of rheumatology; ADA: adalimumab; ADAb: anti-drug antibodies; AE: adverse event; anti-ccp: anti cyclic citrullinated peptide; AS: ankylosing spondylitis; ASAS: assessment in spondyloarthritis international society; ASDAS: ankylosing spondylitis disease activity score; AU: arbitrary units; AUC: area under the curve; BASDAI: Bath ankylosing spondylitis disease activity index; bELISA: bridging enzyme-linked immunosorbent assay; BMI: body mass index; c: concentration; CD: Crohn's disease; CDAl: clinical disease activity index; cELISA: competitive enzyme-linked immunosorbent assay; ; Cmax: maximal concentration; Cmin: minimal concentration; Ctrough: trough concentration; DL: drug level; ESR: erythrocyte sedimentation rate; EULAR: European alliance of associations for rheumatology; CI: confidence interval; CPZ: certolizumab pegol; CRP: C-reactive protein; DAS28: disease activity in 28 joints; DAS44: disease activity in 44 joints; (b)DMARD: (biological) disease modifying anti-rheumatic drug; ECLIA: electrochemiluminescence assay; EIA: enzyme immunoassay; ELISA: enzyme-linked immunosorbent assay; ETN: etanercept; EQ-5D: EuroQol 5 dimensions; GEE: general equation estimation; GLM: golimumab; HAQ: health assessment questionnaire; HLA-B27: human leucocyte antigen B27; HMSA: homogeneous mobility shift assay; HR: hazard ratio; IBD: inflammatory bowel disease; ICC: intra-class correlation coefficient; IFMA: immunofluorometric assay; IFX: infliximab; IQR: interquartile range; LC-MS/MS: liquid chromatography coupled with tandem mass spectrometry; LEF: leflunomide; LFA: lateral-flow assay; LDA: low disease activity; LOCF: last observation carried forward; MTX: methotrexate; N/A: not available; NPV: negative predictive value; NSAID: non-steroidal anti-inflammatory drug; OR: odds ratio; PASI: psoriasis area severity index; PD: pharmacodynamics; PDUS: power Doppler ultrasound; PG: polyglutamates; PK: pharmacokinetics; POC: point-of-care method; PPV: positive predictive value; QALY: quality adjusted life years; QB: Quantum blue point-of-care method; PsA: psoriatic arthritis; pts: patients; RA: rheumatoid arthritis; rc: regression coefficient; RCT: randomized clinical trial; RF: rheumatoid factor; RGA: cell-based reporter gene assay; RIA radioimmunoassay; RoB: risk of bias; ROC: receiver operator curve; RTX: rituximab; SD: standard deviation; SDAl: simplified disease activity index; SF-36: short form 36; SJC: swollen joint count; (ax)SpA: (axial) spondyloarthritis; SPR: surface plasmon resonance point-of-care method; TCZ: tocilizumab; TDM: therapeutic drug monitoring; TJC: tender joint count; TSS: total Sharp score; IV: intravenous; SC: subcutaneous; TNFi: tumour necrosis factor inhibitor; UC: ulcerative colitis; W: week;
